# Supplementary material for: Chimpanzee facial gestures and the implications for the evolution of language
Source: PeerJ journal article supplement (doi:10.7717/peerj.12237), 2021-09-22
Supplement: Florkiewicz_and_Campbell_Data_S1_FINAL.xlsx [file Florkiewicz_and_Campbell_Data_S1_FINAL.xlsx]

## Sheet: Raw Data
Video File	Begin Time	Modality	SignalType	Elaboration1 (@End)?	Mechanically Ineffective?	Persistence (@End)?	Receiver Immediate Response	ReceiverAttn	RecipientID	Response Waiting (@End)?	Response Waiting (while Persisting)?	Response Wait Overall	SignalerID	InteractionOutcome	PresumedGoal	General Behavioral Context
10_7_17 GLENN (A)_2.eaf	00:04:23.054000	FE	PANT HOOT FACE	1	1	1	1	1	1	0	1	1	PANDORA	1	1	AFFILIATIVE
10_7_17 GLENN (A)_2.eaf	00:04:45.429000	FE	AMBIGUOUS FACE	1	1	1	1	1	1	0	1	1	PANDORA	1	1	AFFILIATIVE
10_7_17 GLENN (A)_2.eaf	00:04:50.483000	GE	PRESENT BODY PART	1	1	1	1	1	1	1	1	1	BEN	1	1	AFFILIATIVE
10_7_17 GLENN (A)_2.eaf	00:04:55.132000	GE	AMB TOUCH	0	1	0	0	1	1	0	0	0	PANDORA	1	1	AFFILIATIVE
10_7_17 GLENN (A)_2.eaf	00:17:07.365000	GE	REACH	0	1	1	1	1	1	0	1	1	YOSHI	1	1	FOOD
10_7_17 GLENN (B)_2.eaf	00:05:26.687000	GE	PRESENT CLIMB ON ME	1	1	1	1	0	1	0	1	1	GRACIE	1	1	LOCOMOTION
10_7_17 JAKE (A)_2.eaf	00:04:45.702000	GE	SWING/ROCK	1	1	1	1	0	0	0	0	0	JAKE	0	0	AROUSAL (GENERAL)
10_7_17 JAKE (A)_2.eaf	00:06:29.080000	GE	SWING/ROCK	1	1	1	1	0	0	0	0	0	JAKE	1	0	AROUSAL (GENERAL)
10_7_17 JAKE (A)_2.eaf	00:16:54	GE	SWING/ROCK	1	1	1	0	0	0	0	0	0	JAKE	1	0	AROUSAL (GENERAL)
10_7_17 JAKE (A)_2.eaf	00:17:29.400000	FE	PANT HOOT FACE	1	1	1	1	0	0	0	0	0	JAKE	1	0	AROUSAL (GENERAL)
10_7_17 JAKE (A)_2.eaf	00:17:32.900000	FE	PANT HOOT FACE	1	1	1	1	1	1	0	0	0	SHAUN	1	0	AROUSAL (GENERAL)
10_7_17 JAKE (A)_2.eaf	00:17:37.050000	GE	SWING/ROCK	1	1	1	0	1	1	0	0	0	SHAUN	1	0	AROUSAL (GENERAL)
10_7_17 JAKE (A)_2.eaf	00:21:03.729000	GE	SWING/ROCK	1	1	1	1	0	0	0	0	0	JAKE	0	0	AROUSAL (GENERAL)
10_7_17 JAKE (A)_2.eaf	00:21:03.918000	FE	PANT HOOT FACE	1	1	1	1	0	0	0	0	0	JAKE	0	0	AROUSAL (GENERAL)
10_7_17 JAKE (A)_2.eaf	00:22:35.918000	GE	SWING/ROCK	1	1	1	0	0	0	0	0	0	JAKE	0	0	AROUSAL (GENERAL)
10_7_17 JAKE (A)_2.eaf	00:22:37.648000	FE	PANT HOOT FACE	1	1	1	1	0	0	0	0	0	JAKE	0	0	AROUSAL (GENERAL)
10_7_17 SHAUN (A).eaf	00:06:07.080000	FE	PANT HOOT FACE	1	1	1	0	0	1	0	0	0	REGINA	0	0	AROUSAL (GENERAL)
10_7_17 SHAUN (A).eaf	00:15:13.377000	FE	PANT HOOT FACE	1	1	1	0	0	1	0	0	0	YOSHI	0	0	AROUSAL (GENERAL)
10_7_17 SHAUN (A).eaf	00:15:49.346000	GE	BITE	1	1	1	0	0	1	0	0	0	YOSHI	0	0	AROUSAL (GENERAL)
10_7_17 SHAUN (A).eaf	00:19:28.993000	FE	PANT HOOT FACE	1	1	1	0	1	1	0	1	1	REGINA	1	0	AROUSAL (GENERAL)
10_7_17 SHAUN (A).eaf	00:19:32.134000	GE	SWING/ROCK	1	1	1	0	1	1	0	1	1	REGINA	1	0	AROUSAL (GENERAL)
10_7_17 SHAUN (A).eaf	00:20:03.887000	GE	SWING/ROCK	1	1	1	1	0	1	0	1	1	SHAUN	1	0	AROUSAL (GENERAL)
10_8_17 JOHARI (A)_2.eaf	00:00:42.216000	GE	AMB TOUCH	1	1	1	1	0	1	0	1	1	JOHARI	1	1	LOCOMOTION
10_8_17 JOHARI (A)_2.eaf	00:04:27.432000	GE	TANDEM WALK	1	1	1	1	0	1	0	1	1	JOHARI	1	1	PLAY
10_8_17 JOHARI (A)_2.eaf	00:07:28.918000	GE	ROLL OVER	1	1	1	1	1	1	0	1	1	JULIE	1	1	PLAY
10_8_17 JOHARI (A)_2.eaf	00:07:43.702000	GE	REACH	1	1	1	1	1	1	1	0	1	JULIE	1	1	PLAY
10_8_17 JOHARI (A)_2.eaf	00:07:52.297000	GE	AMB TOUCH	1	1	1	1	1	1	1	1	1	JULIE	1	1	PLAY
10_8_17 JOHARI (A)_2.eaf	00:08:03.188000	GE	THROW OBJECT	1	1	0	1	1	1	0	0	0	JOHARI	1	1	PLAY
10_8_17 JOHARI (A)_2.eaf	00:08:05.161000	GE	SLAP OTHER	1	1	0	1	1	1	0	0	0	JOHARI	1	1	PLAY
10_8_17 JOHARI (A)_2.eaf	00:14:09.026000	GE	AMB TOUCH	0	1	1	1	1	1	0	1	1	ZOE	1	1	PLAY
10_8_17 JULIE (A).eaf	00:00:52.097000	GE	AMB TOUCH	1	1	1	1	0	1	0	1	1	JULIE	1	1	LOCOMOTION
10_8_17 JULIE (A).eaf	00:00:54.286000	GE	AMB TOUCH	1	1	1	1	1	1	0	0	0	JULIE	1	1	LOCOMOTION
10_8_17 JULIE (A).eaf	00:01:03.070000	GE	TANDEM WALK	1	1	1	1	0	1	0	1	1	JOHARI	1	1	LOCOMOTION
10_8_17 JULIE (A).eaf	00:01:07.638000	GE	PRESENT CLIMB ON ME	1	1	1	1	1	1	0	1	1	JULIE	1	1	LOCOMOTION
10_8_17 JULIE (A).eaf	00:02:37.246000	GE	EMBRACE	1	1	1	1	1	1	0	0	0	OLIVER	1	1	AFFILIATIVE
10_8_17 JULIE (A).eaf	00:02:38.813000	GE	SWING/ROCK	1	1	1	1	0	1	0	0	0	OLIVER	1	1	AFFILIATIVE
10_8_17 JULIE (A).eaf	00:02:40.462000	GE	SWING/ROCK	1	1	1	1	1	1	0	0	0	JULIE	1	1	AFFILIATIVE
10_8_17 JULIE (A).eaf	00:02:43.462000	FE	PANT HOOT FACE	1	1	1	0	0	0	0	0	0	JULIE	1	1	AFFILIATIVE
11_7_17 BEN (A)_2.eaf	00:08:47.891000	GE	AMB TOUCH	0	1	0	1	0	1	0	0	0	JULIE	1	1	GROOM
11_7_17 JEAN (A)_2.eaf	00:21:26.877000	GE	LOOK	1	1	1	0	0	1	0	1	1	JULIE	0	1	FOOD
11_7_17 JERRARD (A)_2.eaf	00:00:56.862000	FE	AMBIGUOUS FACE	1	1	0	1	1	1	1	0	1	GRACIE	1	1	LOCOMOTION
11_7_17 JERRARD (A)_2.eaf	00:00:57.214000	GE	AMB TOUCH	1	1	1	1	1	1	1	0	1	GRACIE	1	1	LOCOMOTION
11_7_17 JERRARD (A)_2.eaf	00:05:59.335000	GE	LOOK	1	1	1	0	0	1	0	1	1	KIMA	0	1	REST
11_7_17 JERRARD (A)_2.eaf	00:21:35.026000	FE	SCREAM FACE	1	1	1	1	1	1	0	1	1	JULIE	1	1	AGONISTIC
11_7_17 JERRARD (A)_2.eaf	00:21:35.772000	GE	AMB TOUCH	1	1	0	1	1	1	0	0	0	BEN	1	1	AGONISTIC
11_7_17 JERRARD (A)_2.eaf	00:22:06.780000	FE	RASPBERRY FACE	1	1	1	1	0	1	0	0	0	PANDORA	1	1	GROOM
11_7_17 JERRARD (A)_2.eaf	00:22:07.455000	FE	RASPBERRY FACE	0	1	1	1	0	1	0	0	0	BEN	1	1	GROOM
11_7_17 JERRARD (B)_2.eaf	00:00:01.081000	FE	BARED TEETH FACE	1	1	1	1	1	1	0	0	0	GRACIE	1	1	SEX
11_7_17 JERRARD (B)_2.eaf	00:00:03.216000	FE	AMBIGUOUS FACE	1	1	0	1	0	1	1	0	1	SHAUN	1	1	SEX
11_7_17 JERRARD (B)_2.eaf	00:00:17.951000	GE	SWING/ROCK	1	1	1	1	0	1	0	1	1	SHAUN	1	1	SEX
11_7_17 JERRARD (B)_2.eaf	00:00:18.789000	GE	PRESENT SEXUAL	0	1	1	1	1	1	0	1	1	GRACIE	1	1	SEX
11_7_17 JERRARD (B)_2.eaf	00:00:21.472000	GE	SWING/ROCK	1	1	1	1	0	1	0	1	1	SHAUN	1	1	SEX
11_7_17 JERRARD (B)_2.eaf	00:00:22.850000	GE	DIRECTED PUSH	1	0	0	1	0	1	0	1	1	SHAUN	1	1	SEX
11_7_17 JERRARD (B)_2.eaf	00:00:24.310000	GE	BITE	1	1	0	0	0	1	0	0	0	SHAUN	1	1	SEX
11_7_17 JERRARD (B)_2.eaf	00:01:33.108000	GE	ARM RAISE	1	1	0	1	1	1	1	1	1	GRACIE	1	1	AGONISTIC
11_7_17 JERRARD (B)_2.eaf	00:01:36.757000	GE	PRESENT BODY PART	1	1	1	1	1	1	0	1	1	GRACIE	1	1	AGONISTIC
11_7_17 JERRARD (B)_2.eaf	00:01:37.567000	FE	SCREAM FACE	1	1	1	1	0	1	0	1	1	GRACIE	1	1	AGONISTIC
11_7_17 JERRARD (B)_2.eaf	00:01:38.365000	FE	PANT HOOT FACE	1	1	1	1	0	1	0	1	1	BEN	1	1	AGONISTIC
11_7_17 JERRARD (B)_2.eaf	00:01:39.621000	GE	SWING/ROCK	1	1	1	1	0	1	0	1	1	BEN	1	1	AGONISTIC
11_7_17 JERRARD (B)_2.eaf	00:01:42.986000	GE	THROW OBJECT	1	1	0	1	1	1	0	0	0	BEN	1	1	AGONISTIC
11_7_17 JERRARD (B)_2.eaf	00:01:44.446000	GE	CLAP	1	1	1	1	1	1	0	0	0	BEN	1	1	AGONISTIC
11_7_17 JERRARD (B)_2.eaf	00:01:46.378000	GE	HAND FLING	1	1	0	1	0	1	1	0	1	GRACIE	1	1	AGONISTIC
11_7_17 JERRARD (B)_2.eaf	00:02:17.181000	FE	RASPBERRY FACE	1	1	1	0	1	1	0	1	1	PANDORA	1	1	GROOM
11_7_17 JERRARD (B)_2.eaf	00:04:25.229000	FE	AMBIGUOUS FACE	1	1	1	0	1	1	0	1	1	PANDORA	1	1	GROOM
11_7_17 JERRARD (B)_2.eaf	00:04:27.445000	FE	RASPBERRY FACE	1	1	1	0	1	1	0	1	1	BEN	1	1	GROOM
11_7_17 JERRARD (B)_2.eaf	00:04:27.526000	GE	AMB TOUCH	0	1	1	1	0	1	0	1	1	BEN	1	1	GROOM
11_7_17 JERRARD (B)_2.eaf	00:04:27.851000	FE	RASPBERRY FACE	0	1	0	1	0	1	1	1	1	PANDORA	1	1	GROOM
11_7_17 PANDORA (A).eaf	00:00:13.080000	GE	AMB TOUCH	0	1	0	1	1	1	1	0	1	JERRARD	1	1	LOCOMOTION
11_7_17 PANDORA (A).eaf	00:00:25.296000	GE	AMB TOUCH	0	1	0	1	0	1	0	0	0	GRACIE	1	1	LOCOMOTION
11_7_17 PANDORA (A).eaf	00:00:38.783000	GE	AMB TOUCH	1	1	1	1	1	1	0	1	1	JOHARI	1	1	LOCOMOTION
11_7_17 PANDORA (A).eaf	00:01:13.188000	GE	AMB TOUCH	1	1	1	1	0	1	0	1	1	KIMA	1	1	LOCOMOTION
11_7_17 PANDORA (A).eaf	00:01:25.080000	GE	PUNCH OTHER	1	1	1	1	0	1	1	1	1	JERRARD	0	1	REST
11_7_17 PANDORA (A).eaf	00:19:39.864000	GE	BITE	1	0	1	1	1	1	0	0	0	PANDORA	1	0	GROOM
11_7_17 PANDORA (A).eaf	00:20:11.729000	GE	BITE	1	0	1	1	0	1	0	0	0	PANDORA	1	0	GROOM
11_7_17 PANDORA (A).eaf	00:20:42.404000	GE	BITE	1	0	1	1	1	1	0	0	0	PANDORA	1	0	GROOM
11_7_17 PANDORA (A).eaf	00:21:02.783000	FE	AMBIGUOUS FACE	1	1	1	1	1	1	0	1	1	KIMA	1	0	GROOM
11_7_17 PANDORA (A).eaf	00:21:08.431000	GE	BITE	1	1	1	1	1	1	0	0	0	PANDORA	1	0	GROOM
11_7_17 PANDORA (A).eaf	00:21:21.378000	GE	PUSH	1	1	1	1	1	1	0	1	1	GRACIE	1	1	LOCOMOTION
11_7_17 PANDORA (A).eaf	00:21:25.378000	GE	AMB TOUCH	1	1	1	1	1	1	0	1	1	GRACIE	1	1	LOCOMOTION
11_7_17 PANDORA (A).eaf	00:21:37.486000	GE	BITE	1	1	1	1	1	1	0	1	1	KIMA	1	1	REST
11_7_17 PANDORA (A).eaf	00:21:38.377000	GE	AMB TOUCH	1	1	1	1	1	1	0	1	1	JERRARD	1	1	REST
11_7_17 PANDORA (A).eaf	00:21:51.810000	GE	AMB TOUCH	1	1	1	1	1	1	0	1	1	KIMA	1	1	REST
11_7_17 PANDORA (A).eaf	00:21:55.918000	GE	AMB TOUCH	1	1	1	1	1	1	0	1	1	KIMA	1	1	REST
11_7_17 PANDORA (A).eaf	00:21:57.540000	GE	AMB TOUCH	1	0	1	1	1	1	0	0	0	JERRARD	1	1	REST
11_8_17 GRACIE (A)_2.eaf	00:16:56.361000	GE	AMB TOUCH	0	1	1	1	0	1	0	1	1	GRACIE	1	1	AFFILIATIVE
11_8_17 KIMA (A).eaf	00:23:06.981000	GE	LOOK	1	1	1	0	1	1	0	1	1	UKI	1	1	PLAY
11_8_17 KIMA (A).eaf	00:23:12.846000	GE	ROLL OVER	0	1	1	1	1	1	0	1	1	UKI	1	1	PLAY
11_8_17 KIMA (B).eaf	00:00:01.135000	GE	PUSH	1	1	0	1	0	1	0	0	0	JOHARI	1	1	LOCOMOTION
11_8_17 ZURI (A).eaf	00:00:55.534000	GE	SLAP OTHER WITH OBJECT	1	1	1	1	1	1	0	1	1	JOHARI	1	1	PLAY
11_8_17 ZURI (A).eaf	00:00:57.749000	GE	PUNCH OTHER	1	1	1	1	1	1	1	1	1	NAN	1	1	PLAY
11_8_17 ZURI (A).eaf	00:00:58.789000	FE	LOWER LIP RELAXER FACE	0	1	0	1	1	1	1	1	1	NAN	1	1	PLAY
12_6_17 JEAN (A)_2.eaf	00:00:46.161000	GE	AMB TOUCH	1	1	1	1	0	1	0	1	1	JULIE	1	1	LOCOMOTION
12_6_17 JULIE (B).eaf	00:04:21.265000	GE	AMB TOUCH	0	1	1	1	1	1	0	1	1	JULIE	1	1	LOCOMOTION
12_6_17 JULIE (B).eaf	00:04:50.999000	GE	REACH	1	1	1	1	1	1	0	1	1	JULIE	1	1	AFFILIATIVE
12_6_17 JULIE (B).eaf	00:04:55.567000	GE	EMBRACE	1	1	1	1	0	1	0	0	0	JULIE	1	1	AFFILIATIVE
12_6_17 JULIE (B).eaf	00:04:57.336000	GE	SWING/ROCK	1	1	1	0	0	1	0	0	0	JULIE	1	1	AFFILIATIVE
12_6_17 OLIVER (A).eaf	00:01:15.514000	GE	AMB TOUCH	1	1	1	1	1	1	0	1	1	JULIE	1	1	AFFILIATIVE
12_6_17 OLIVER (A).eaf	00:01:18.595000	GE	EMBRACE	1	1	1	1	0	1	0	0	0	JULIE	1	1	AFFILIATIVE
12_6_17 OLIVER (A).eaf	00:01:22.297000	GE	SWING/ROCK	1	1	1	0	0	1	0	0	0	JULIE	1	1	AFFILIATIVE
12_6_17 OLIVER (A).eaf	00:01:55.026000	GE	EMBRACE	1	1	1	1	0	1	0	0	0	JULIE	1	1	AFFILIATIVE
12_6_17 OLIVER (A).eaf	00:01:59.161000	GE	SWING/ROCK	1	1	1	0	0	1	0	0	0	JULIE	1	1	AFFILIATIVE
12_6_17 OLIVER (A).eaf	00:02:12.080000	GE	SWING/ROCK	1	1	1	1	1	1	0	0	0	JULIE	1	1	AFFILIATIVE
12_6_17 OLIVER (A).eaf	00:02:12.485000	GE	SWING/ROCK	1	1	1	1	0	1	0	0	0	OLIVER	1	1	AFFILIATIVE
12_6_17 OLIVER (A).eaf	00:06:49.323000	GE	LOOK	1	1	1	0	0	1	0	1	1	UKI	0	1	FOOD
12_6_17 OLIVER (A).eaf	00:08:27.999000	GE	SLAP OTHER	1	1	0	1	1	1	1	0	1	OLIVER	1	1	PLAY
12_6_17 OLIVER (A).eaf	00:08:56.323000	FE	PLAY FACE	1	1	1	1	0	1	1	1	1	OLIVER	1	1	PLAY
12_6_17 OLIVER (A).eaf	00:15:04.011000	GE	PRESENT CLIMB ON ME	1	1	1	1	0	1	0	1	1	ZURI	1	1	LOCOMOTION
12_6_17 OLIVER (A).eaf	00:17:20.661000	GE	LOOK	1	1	1	0	1	1	0	1	1	UKI	0	1	FOOD
12_6_17 OLIVER (A).eaf	00:22:56.794000	GE	AMB TOUCH	1	1	1	0	0	1	0	1	1	UKI	1	1	LOCOMOTION
12_6_17 OLIVER (A).eaf	00:23:02.010000	GE	PRESENT CLIMB ON ME	1	1	0	1	1	1	0	1	1	UKI	1	1	LOCOMOTION
12_6_17 OLIVER (B).eaf	00:02:28.832000	GE	AMB TOUCH	1	1	1	1	1	1	1	1	1	JULIE	1	1	LOCOMOTION
12_6_17 ZOE (A).eaf	00:02:24.269000	GE	EMBRACE	1	1	1	1	1	1	0	0	0	JOHARI	1	0	AFFILIATIVE
12_6_17 ZOE (A).eaf	00:06:43.221000	FE	AMBIGUOUS FACE	1	1	1	1	0	1	0	1	1	JOHARI	1	1	LOCOMOTION
12_6_17 ZOE (A).eaf	00:06:43.923000	GE	PUSH	1	1	0	1	0	1	1	1	1	JOHARI	1	1	LOCOMOTION
12_6_17 ZOE (A).eaf	00:06:46.815000	GE	AMB TOUCH	1	1	0	1	0	1	0	0	0	JOHARI	1	1	LOCOMOTION
12_6_17 ZOE (A).eaf	00:10:01.188000	GE	AMB TOUCH	1	1	1	1	1	1	0	1	1	JOHARI	1	1	LOCOMOTION
12_6_17 ZOE (A).eaf	00:10:02.431000	GE	KICK	1	1	1	1	0	1	0	1	1	JOHARI	1	1	LOCOMOTION
12_7_17 NAN (A)_2.eaf	00:02:02.191000	FE	PANT HOOT FACE	1	1	1	1	0	0	0	0	0	NAN	1	0	AROUSAL (GENERAL)
12_7_17 NAN (A)_2.eaf	00:04:27.210000	GE	LOOK	1	1	1	1	0	1	0	1	1	UKI	0	1	FOOD
12_7_17 NAN (A)_2.eaf	00:04:28.587000	GE	LOOK	1	1	1	1	0	1	0	1	1	OLIVER	0	1	FOOD
12_7_17 NAN (A)_2.eaf	00:10:00.141000	GE	SWING/ROCK	1	1	1	0	0	0	0	0	0	SHAUN	1	0	AROUSAL (GENERAL)
12_7_17 NAN (A)_2.eaf	00:10:12.222000	GE	EMBRACE	1	1	0	1	0	1	0	0	0	SHAUN	1	0	AROUSAL (GENERAL)
12_7_17 UKI (A).eaf	00:01:17.891000	GE	LOOK	0	1	1	1	0	1	0	1	1	UKI	1	1	FOOD
12_7_17 UKI (A).eaf	00:03:49.146000	GE	PRESENT CLIMB ON ME	1	1	1	1	1	1	0	1	1	UKI	1	1	LOCOMOTION
12_7_17 UKI (A).eaf	00:14:54.143000	GE	AMB TOUCH	1	1	0	1	0	1	1	1	1	JULIE	1	1	LOCOMOTION
12_7_17 UKI (A).eaf	00:14:54.467000	FE	LOWER LIP RELAXER FACE	1	1	1	0	0	1	0	1	1	JULIE	1	1	LOCOMOTION
12_7_17 UKI (A).eaf	00:14:57.656000	GE	AMB TOUCH	1	1	1	1	1	1	0	1	1	JULIE	1	1	LOCOMOTION
12_7_17 UKI (A).eaf	00:20:01.877000	GE	AMB TOUCH	1	1	1	1	1	1	0	1	1	JULIE	1	1	LOCOMOTION
12_7_17 UKI (A).eaf	00:22:40.231000	GE	LOOK	0	1	1	0	0	1	0	1	1	UKI	0	1	PLAY
12_7_17 YOSHI (A).eaf	00:01:18.233000	GE	SWING/ROCK	1	1	1	1	1	1	0	0	0	ZOE	1	0	AROUSAL (GENERAL)
12_9_17 JOHARI (A)_2.eaf	00:14:21.305000	FE	PANT HOOT FACE	0	1	0	1	0	1	1	1	1	GRACIE	1	1	LOCOMOTION
12_9_17 JOHARI (B)_2.eaf	00:04:53.032000	GE	REACH	1	1	1	1	1	1	0	1	1	JOHARI	1	1	AFFILIATIVE
12_9_17 JOHARI (B)_2.eaf	00:05:01.627000	GE	PRESENT SEXUAL	1	1	1	1	0	1	0	1	1	JEAN	1	1	AFFILIATIVE
12_9_17 JOHARI (B)_2.eaf	00:05:04.964000	GE	AMB TOUCH	1	1	0	1	1	1	0	0	0	JOHARI	1	1	AFFILIATIVE
12_9_17 OLIVER (A).eaf	00:06:22.837000	GE	DIRECTED PUSH	1	1	0	1	0	1	1	0	1	JULIE	1	1	LOCOMOTION
12_9_17 UKI (A).eaf	00:08:20.729000	FE	POUT FACE	1	1	1	1	1	1	0	1	1	UKI	1	1	FOOD
12_9_17 UKI (A).eaf	00:08:22.432000	GE	AMB TOUCH	1	1	0	1	1	1	1	1	1	UKI	1	1	FOOD
12_9_17 UKI (A).eaf	00:08:22.945000	GE	AMB TOUCH	1	1	0	0	1	1	0	1	1	YOSHI	1	1	FOOD
12_9_17 UKI (A).eaf	00:08:23.540000	FE	AMBIGUOUS FACE	0	1	0	1	1	1	1	0	1	YOSHI	1	1	FOOD
12_9_17 UKI (A).eaf	00:23:48.837000	GE	SLAP OTHER	1	1	1	1	1	1	0	0	0	SHAUN	1	1	PLAY
13_7_17 ZOE (A).eaf	00:05:22.621000	GE	SWING/ROCK	1	1	1	1	1	1	0	1	1	JERRARD	1	0	AROUSAL (GENERAL)
13_7_17 ZOE (A).eaf	00:05:30.972000	GE	AMB TOUCH	1	1	1	1	0	1	0	1	1	ZOE	1	0	AROUSAL (GENERAL)
13_7_17 ZOE (A).eaf	00:05:31.336000	FE	AMBIGUOUS FACE	1	1	1	1	0	1	0	1	1	ZOE	1	0	AROUSAL (GENERAL)
13_7_17 ZOE (A).eaf	00:05:46.267000	FE	BARED TEETH FACE	1	1	1	1	0	0	0	1	1	REGINA	1	0	AROUSAL (GENERAL)
13_7_17 ZOE (A).eaf	00:06:12.067000	GE	AMB TOUCH	1	1	1	1	0	1	0	1	1	JOHARI	1	1	LOCOMOTION
13_7_17 ZOE (B).eaf	00:01:09.566000	GE	THROW OBJECT	1	1	0	0	1	1	0	0	0	JOHARI	1	1	PLAY
13_7_17 ZOE (B).eaf	00:01:11.755000	GE	STOMP	1	1	1	0	1	1	0	1	1	JOHARI	1	1	PLAY
13_7_17 ZOE (B).eaf	00:01:13.242000	FE	PLAY FACE	1	1	1	1	1	1	1	1	1	JOHARI	1	1	PLAY
13_7_17 ZOE (B).eaf	00:01:15.404000	GE	AMB TOUCH	1	1	1	0	0	1	1	1	1	JOHARI	1	1	PLAY
13_7_17 ZOE (B).eaf	00:01:21.647000	GE	SWING/ROCK	1	1	1	0	0	0	0	1	1	JOHARI	1	1	PLAY
13_7_17 ZOE (B).eaf	00:01:22.120000	FE	PLAY FACE	1	1	1	0	0	0	0	1	1	JOHARI	1	1	PLAY
13_7_17 ZOE (B).eaf	00:01:26.025000	GE	STOMP	1	1	1	1	1	1	0	1	1	JOHARI	1	1	PLAY
13_7_17 ZOE (B).eaf	00:01:26.876000	GE	ARM RAISE	1	1	1	1	1	1	0	1	1	JOHARI	1	1	PLAY
13_7_17 ZOE (B).eaf	00:01:29.653000	GE	AMB TOUCH	0	1	1	0	0	1	0	0	0	JOHARI	1	1	PLAY
13_7_17 ZOE (B).eaf	00:03:53.729000	FE	PLAY FACE	1	1	1	1	0	0	0	0	0	ZURI	1	1	PLAY
13_7_17 ZOE (B).eaf	00:03:53.729000	GE	PIROUETTE	1	1	1	1	0	0	0	0	0	ZURI	1	1	PLAY
13_7_17 ZURI (A).eaf	00:02:20.850000	GE	TAP/SLAP/KNOCK OBJECT	1	1	1	1	0	1	1	1	1	ZURI	0	1	PLAY
13_7_17 ZURI (A).eaf	00:02:37.931000	FE	PLAY FACE	1	1	1	1	0	1	1	0	1	ZURI	0	1	PLAY
13_7_17 ZURI (A).eaf	00:03:19.314000	GE	PUSH	0	1	0	1	0	1	0	0	0	SHAUN	1	1	LOCOMOTION
13_7_17 ZURI (A).eaf	00:08:54.003000	FE	AMBIGUOUS FACE	0	1	0	1	1	1	1	0	1	JEAN	0	1	PLAY
13_7_17 ZURI (A).eaf	00:09:14.453000	GE	CLAP	1	1	1	0	1	1	0	1	1	ZURI	0	1	PLAY
13_7_17 ZURI (B).eaf	00:03:44.207000	GE	PUSH	1	1	1	1	0	1	0	1	1	JOHARI	1	1	SEX
13_7_17 ZURI (B).eaf	00:03:57.116000	GE	AMB TOUCH	1	1	1	1	0	1	1	1	1	REGINA	1	1	SEX
13_7_17 ZURI (B).eaf	00:04:00.683000	FE	PLAY FACE	1	1	1	1	0	1	1	1	1	REGINA	1	1	SEX
13_7_17 ZURI (B).eaf	00:04:09.216000	GE	THROW OBJECT	1	1	0	1	1	1	0	1	1	JOHARI	1	1	SEX
13_7_17 ZURI (B).eaf	00:04:13.567000	GE	AMB TOUCH	1	1	1	1	1	1	0	1	1	JOHARI	1	1	SEX
14_6_17 GLENN (A)_2.eaf	00:00:55.431000	FE	LIPSMACKING FACE	1	1	1	0	0	1	0	1	1	SHAUN	1	1	GROOM
14_6_17 GLENN (A)_2.eaf	00:01:02.837000	FE	RASPBERRY FACE	0	1	1	0	0	1	0	0	0	SHAUN	1	1	GROOM
14_6_17 GLENN (A)_2.eaf	00:01:44.377000	FE	LIPSMACKING FACE	0	1	1	0	0	1	0	0	0	SHAUN	1	1	GROOM
14_6_17 GLENN (A)_2.eaf	00:08:24.741000	FE	PANT HOOT FACE	1	1	1	1	0	0	0	0	0	GLENN	1	0	AROUSAL (GENERAL)
14_6_17 GLENN (A)_2.eaf	00:08:25.309000	FE	PANT HOOT FACE	1	1	1	1	0	0	0	0	0	SHAUN	1	0	AROUSAL (GENERAL)
14_6_17 GLENN (A)_2.eaf	00:08:25.984000	FE	PANT HOOT FACE	1	1	1	1	0	0	0	0	0	BEN	1	0	AROUSAL (GENERAL)
14_6_17 GLENN (A)_2.eaf	00:10:46.814000	GE	ARM RAISE	1	1	1	1	1	1	0	1	1	GLENN	1	1	AFFILIATIVE
14_6_17 GLENN (A)_2.eaf	00:10:47.250000	FE	PANT HOOT FACE	1	1	1	1	1	1	0	1	1	JULIE	1	1	AFFILIATIVE
14_6_17 GLENN (A)_2.eaf	00:10:47.799000	GE	AMB TOUCH	1	1	1	1	1	1	0	1	1	JULIE	1	1	AFFILIATIVE
14_6_17 GLENN (A)_2.eaf	00:10:49.921000	GE	EMBRACE	1	1	0	1	1	1	0	0	0	GLENN	1	1	AFFILIATIVE
14_6_17 GLENN (A)_2.eaf	00:10:49.999000	FE	AMBIGUOUS FACE	1	1	1	0	0	1	0	0	0	JULIE	1	1	AFFILIATIVE
14_6_17 REGINA (A).eaf	00:01:48.245000	GE	LOOK	1	1	1	0	1	1	0	1	1	OLIVER	0	1	FOOD
14_6_17 ZURI (A).eaf	00:06:52.781000	GE	PRESENT CLIMB ON ME	1	1	1	1	1	1	1	1	1	ZURI	1	1	LOCOMOTION
14_6_17 ZURI (A).eaf	00:12:37.893000	GE	PRESENT CLIMB ON ME	1	1	0	1	1	1	0	1	1	UKI	1	1	LOCOMOTION
14_6_17 ZURI (A).eaf	00:15:42.741000	GE	LOOK	1	1	1	0	1	1	0	1	1	ZURI	0	1	FOOD
14_7_17 JOHARI (A)_2.eaf	00:07:59.890000	GE	PRESENT SEXUAL	1	1	1	1	1	1	0	1	1	ZURI	1	1	SEX
14_7_17 JOHARI (A)_2.eaf	00:09:55.702000	GE	TAP/SLAP/KNOCK OBJECT	1	1	1	0	0	1	1	0	1	JOHARI	1	1	PLAY
14_7_17 JOHARI (A)_2.eaf	00:10:01.324000	FE	PLAY FACE	1	1	1	1	1	1	0	1	1	JOHARI	1	1	PLAY
14_7_17 JOHARI (A)_2.eaf	00:10:05.864000	FE	PLAY FACE	1	1	1	1	1	1	0	1	1	JOHARI	1	1	PLAY
14_7_17 JOHARI (A)_2.eaf	00:10:09.108000	GE	PRESENT SEXUAL	1	1	1	1	1	1	0	1	1	REGINA	1	1	PLAY
14_7_17 JOHARI (A)_2.eaf	00:17:21.837000	GE	KICK	1	1	0	1	1	1	1	0	1	UKI	1	1	AGONISTIC
14_7_17 JOHARI (A)_2.eaf	00:17:22.148000	FE	SCREAM FACE	1	1	1	1	1	1	0	1	1	JOHARI	1	1	AGONISTIC
14_7_17 JOHARI (A)_2.eaf	00:17:30.296000	GE	AMB TOUCH	1	1	0	1	1	1	0	0	0	UKI	1	1	AGONISTIC
14_7_17 JOHARI (A)_2.eaf	00:17:31.053000	FE	SCREAM FACE	1	1	1	1	0	1	1	1	1	JOHARI	1	1	AGONISTIC
14_7_17 JOHARI (A)_2.eaf	00:21:23.323000	GE	AMB TOUCH	1	1	0	1	0	1	0	1	1	OLIVER	1	1	PLAY
14_7_17 JOHARI (A)_2.eaf	00:21:25.351000	GE	SLAP OTHER	1	1	1	1	1	1	0	1	1	JERRARD	1	1	PLAY
14_7_17 JULIE (A).eaf	00:03:57.026000	GE	REACH	1	1	0	1	1	1	0	1	1	JULIE	1	1	LOCOMOTION
14_7_17 JULIE (A).eaf	00:03:57.810000	GE	AMB TOUCH	1	1	0	1	1	1	0	1	1	JULIE	1	1	LOCOMOTION
14_7_17 JULIE (A).eaf	00:04:12.945000	GE	EMBRACE	1	1	1	1	1	1	0	0	0	JULIE	1	0	AROUSAL (GENERAL)
14_7_17 JULIE (A).eaf	00:04:14.377000	GE	SWING/ROCK	1	1	1	0	0	1	0	0	0	JULIE	1	0	AROUSAL (GENERAL)
14_7_17 JULIE (A).eaf	00:04:37.404000	GE	REACH	1	1	0	1	1	1	0	0	0	JULIE	1	1	AFFILIATIVE
14_7_17 JULIE (A).eaf	00:04:38.485000	GE	EMBRACE	0	1	0	1	1	1	0	0	0	JULIE	1	1	AFFILIATIVE
14_7_17 JULIE (A).eaf	00:07:23.918000	GE	EMBRACE	1	1	1	1	0	1	0	0	0	JULIE	1	1	AFFILIATIVE
14_7_17 JULIE (A).eaf	00:07:25.594000	GE	SWING/ROCK	1	1	1	0	0	1	0	0	0	JULIE	1	1	AFFILIATIVE
14_7_17 JULIE (A).eaf	00:09:30.084000	FE	PANT HOOT FACE	1	1	1	1	0	0	0	1	1	PANDORA	1	0	AROUSAL (GENERAL)
14_7_17 JULIE (A).eaf	00:09:33.092000	FE	PANT HOOT FACE	1	1	1	1	0	0	0	0	0	GRACIE	1	0	AROUSAL (GENERAL)
14_7_17 JULIE (A).eaf	00:09:35.673000	GE	SWING/ROCK	1	1	1	1	1	1	0	1	1	GLENN	1	0	AROUSAL (GENERAL)
14_7_17 JULIE (A).eaf	00:09:41.997000	GE	EMBRACE	1	1	0	1	1	1	0	0	0	GLENN	1	0	AROUSAL (GENERAL)
14_7_17 JULIE (A).eaf	00:09:43.134000	FE	SCREAM FACE	1	1	1	1	0	1	0	0	0	PANDORA	1	0	AROUSAL (GENERAL)
14_7_17 JULIE (A).eaf	00:13:28.998000	GE	LOOK	0	1	1	1	0	1	0	1	1	SHAUN	0	1	FOOD
14_7_17 JULIE (B).eaf	00:04:13.255000	GE	EMBRACE	1	1	1	1	1	1	0	0	0	JULIE	1	0	AFFILIATIVE
14_7_17 JULIE (B).eaf	00:04:15.606000	GE	SWING/ROCK	1	1	1	0	1	1	0	0	0	JULIE	1	0	AFFILIATIVE
14_7_17 JULIE (B).eaf	00:05:03.793000	GE	AMB TOUCH	1	1	1	1	1	1	0	0	0	JULIE	1	1	AFFILIATIVE
14_7_17 JULIE (B).eaf	00:05:05.712000	GE	EMBRACE	1	1	1	1	1	1	0	0	0	JULIE	1	1	AFFILIATIVE
14_7_17 JULIE (B).eaf	00:05:06.806000	GE	SWING/ROCK	1	1	1	1	1	1	1	0	1	JULIE	1	1	AFFILIATIVE
14_7_17 JULIE (B).eaf	00:05:23.999000	GE	AMB TOUCH	1	1	0	1	0	1	0	0	0	JULIE	1	1	AFFILIATIVE
14_7_17 JULIE (B).eaf	00:05:25.215000	GE	EMBRACE	1	1	1	1	1	1	0	0	0	JULIE	1	1	AFFILIATIVE
14_7_17 JULIE (B).eaf	00:05:26.172000	GE	SWING/ROCK	1	1	1	0	1	1	0	0	0	JULIE	1	1	AFFILIATIVE
14_7_17 OLIVER (A).eaf	00:05:12.891000	GE	DANGLE	1	1	1	1	1	1	0	1	1	OLIVER	1	1	PLAY
14_7_17 OLIVER (A).eaf	00:05:33.864000	GE	DANGLE	1	1	1	0	0	1	0	0	0	ZURI	1	1	PLAY
14_7_17 OLIVER (A).eaf	00:05:41.459000	GE	OBJECT MOVE	1	1	1	1	1	1	0	1	1	ZURI	1	1	PLAY
14_7_17 OLIVER (A).eaf	00:05:41.945000	FE	PLAY FACE	1	1	1	0	0	1	0	0	0	OLIVER	1	1	PLAY
14_7_17 OLIVER (B).eaf	00:00:43.756000	FE	PLAY FACE	1	1	1	1	0	0	1	0	1	YOSHI	1	1	PLAY
14_7_17 OLIVER (B).eaf	00:01:05.135000	GE	PRESENT CLIMB ON ME	1	1	1	1	1	1	0	0	0	ZURI	1	1	PLAY
14_7_17 OLIVER (B).eaf	00:01:15.053000	GE	AMB TOUCH	1	1	1	1	0	1	0	1	1	YOSHI	1	1	PLAY
14_7_17 OLIVER (B).eaf	00:01:53.432000	FE	PLAY FACE	1	1	1	1	0	1	0	1	1	YOSHI	1	1	PLAY
14_8_17 BEN (A)_2.eaf	00:00:42.655000	FE	RASPBERRY FACE	1	1	1	0	0	1	1	1	1	SHAUN	1	1	FOOD
14_8_17 BEN (A)_2.eaf	00:00:58.540000	GE	LOOK	1	1	1	1	0	1	0	1	1	SHAUN	1	1	FOOD
14_8_17 BEN (A)_2.eaf	00:03:05.037000	FE	RASPBERRY FACE	0	1	1	1	0	1	1	1	1	SHAUN	1	1	GROOM
14_8_17 BEN (A)_2.eaf	00:03:20.118000	FE	RASPBERRY FACE	1	1	1	0	0	1	0	0	0	SHAUN	1	1	GROOM
14_8_17 BEN (A)_2.eaf	00:05:46.646000	FE	LIPSMACKING FACE	1	1	1	1	1	1	0	0	0	SHAUN	1	1	GROOM
14_8_17 BEN (A)_2.eaf	00:05:48.630000	FE	RASPBERRY FACE	1	1	1	0	1	1	0	1	1	SHAUN	1	1	GROOM
14_8_17 BEN (A)_2.eaf	00:05:52.619000	FE	LIPSMACKING FACE	1	1	1	0	1	1	0	0	0	SHAUN	1	1	GROOM
14_8_17 BEN (A)_2.eaf	00:06:02.592000	FE	RASPBERRY FACE	0	1	1	0	0	1	0	1	1	SHAUN	1	1	GROOM
14_8_17 JULIE (A).eaf	00:01:21.808000	GE	AMB TOUCH	1	1	1	1	1	1	0	1	1	JOHARI	1	1	LOCOMOTION
14_8_17 JULIE (A).eaf	00:02:21.121000	GE	PUSH	0	1	0	1	0	1	1	1	1	OLIVER	1	1	LOCOMOTION
14_8_17 JULIE (A).eaf	00:04:35.324000	GE	AMB TOUCH	1	1	0	1	1	1	0	1	1	JULIE	1	1	REST
14_8_17 JULIE (A).eaf	00:04:36.891000	GE	EMBRACE	1	1	1	1	0	1	0	0	0	JULIE	1	1	REST
14_8_7 NAN (A)_2.eaf	00:04:13.435000	GE	AMB TOUCH	1	1	1	0	0	1	0	0	0	PANDORA	1	1	AFFILIATIVE
14_8_7 NAN (A)_2.eaf	00:04:20.543000	GE	BITE	0	1	1	0	0	1	0	0	0	PANDORA	1	1	AFFILIATIVE
14_8_7 NAN (A)_2.eaf	00:04:56.458000	FE	PANT HOOT FACE	1	1	1	1	0	0	0	0	0	NAN	1	0	AROUSAL (GENERAL)
15_6_17 BEN (A)_2.eaf	00:07:18.621000	FE	LIPSMACKING FACE	1	1	1	0	0	1	0	0	0	JAKE	1	0	GROOM
15_6_17 BEN (A)_2.eaf	00:16:49.918000	FE	LIPSMACKING FACE	0	1	1	1	1	1	1	1	1	JAKE	1	1	GROOM
15_6_17 BEN (A)_2.eaf	00:17:12.490000	FE	LIPSMACKING FACE	1	1	1	0	0	1	0	0	0	JAKE	1	1	GROOM
15_6_17 BEN (A)_2.eaf	00:20:27.141000	GE	SWING/ROCK	1	1	1	1	0	1	0	1	1	BEN	1	1	AGONISTIC
15_6_17 BEN (A)_2.eaf	00:20:27.925000	FE	RASPBERRY FACE	1	1	1	1	1	1	0	1	1	BEN	1	1	AGONISTIC
15_6_17 JAKE (A)_2.eaf	00:01:15.622000	FE	LIPSMACKING FACE	1	1	1	0	0	1	0	0	0	SHAUN	1	1	GROOM
15_6_17 SHAUN (A).eaf	00:02:20.492000	GE	SWING/ROCK	1	1	1	1	1	1	0	1	1	BEN	1	0	AROUSAL (GENERAL)
15_6_17 SHAUN (A).eaf	00:02:28.492000	GE	EMBRACE	1	1	1	1	1	1	0	0	0	BEN	1	0	AROUSAL (GENERAL)
15_6_17 SHAUN (A).eaf	00:02:28.681000	FE	PANT HOOT FACE	1	1	1	1	1	1	0	1	1	GLENN	1	0	AROUSAL (GENERAL)
15_6_17 SHAUN (A).eaf	00:02:34.323000	FE	RASPBERRY FACE	1	1	1	1	1	1	1	1	1	GLENN	1	1	GROOM
15_6_17 SHAUN (A).eaf	00:05:02.316000	FE	LIPSMACKING FACE	1	1	1	0	1	1	0	1	1	SHAUN	1	0	GROOM
15_6_17 SHAUN (A).eaf	00:05:14.343000	FE	RASPBERRY FACE	1	1	1	0	1	1	0	0	0	SHAUN	1	0	GROOM
15_6_17 SHAUN (A).eaf	00:05:18.532000	FE	LIPSMACKING FACE	1	1	1	0	1	1	0	0	0	SHAUN	1	0	GROOM
15_6_17 SHAUN (A).eaf	00:05:30.858000	FE	RASPBERRY FACE	1	1	1	0	1	1	0	0	0	SHAUN	1	0	GROOM
15_6_17 SHAUN (A).eaf	00:10:52.206000	FE	LIPSMACKING FACE	1	1	1	1	1	1	0	0	0	JAKE	1	0	GROOM
15_6_17 SHAUN (A).eaf	00:16:21.920000	FE	LIPSMACKING FACE	1	1	1	0	1	1	0	0	0	JAKE	1	0	GROOM
15_6_17 SHAUN (A).eaf	00:17:19.880000	FE	RASPBERRY FACE	0	1	1	0	0	1	0	0	0	SHAUN	1	0	GROOM
15_6_17 SHAUN (A).eaf	00:17:55.280000	FE	RASPBERRY FACE	1	1	1	1	1	1	0	0	0	SHAUN	1	0	GROOM
15_8_17 JAKE (A)_2.eaf	00:07:42.161000	GE	LOOK	1	1	1	0	0	1	0	1	1	UKI	0	1	FOOD
16_8_17 JERRARD (A)_2.eaf	00:00:58.720000	GE	EMBRACE	1	1	1	1	0	1	0	0	0	JULIE	1	0	AFFILIATIVE
16_8_17 JERRARD (A)_2.eaf	00:01:00.288000	GE	SWING/ROCK	1	1	1	0	0	1	0	0	0	JULIE	1	0	AFFILIATIVE
16_8_17 JERRARD (A)_2.eaf	00:01:50.513000	FE	AMBIGUOUS FACE	1	1	1	0	0	0	0	0	0	BEN	1	1	AGONISTIC
16_8_17 JERRARD (A)_2.eaf	00:01:56.873000	FE	RASPBERRY FACE	1	1	1	1	1	1	1	1	1	BEN	1	1	AGONISTIC
16_8_17 JERRARD (A)_2.eaf	00:02:09.143000	FE	PANT HOOT FACE	1	1	1	1	0	1	0	1	1	PANDORA	1	1	AGONISTIC
16_8_17 JERRARD (A)_2.eaf	00:02:09.534000	FE	SCREAM FACE	1	1	1	1	0	1	0	1	1	JULIE	1	1	AGONISTIC
16_8_17 PANDORA (A).eaf	00:14:39.460000	GE	LOOK	1	1	1	0	0	1	0	1	1	KIMA	0	1	FOOD
16_8_17 PANDORA (A).eaf	00:17:04.338000	GE	LOOK	1	1	1	1	0	1	0	1	1	KIMA	0	1	FOOD
16_8_17 PANDORA (B).eaf	00:01:43.350000	GE	AMB TOUCH	1	1	0	1	1	1	0	1	1	JULIE	1	1	AFFILIATIVE
16_8_17 PANDORA (B).eaf	00:01:45.404000	GE	EMBRACE	1	1	1	0	1	1	0	0	0	JULIE	1	1	AFFILIATIVE
16_8_17 PANDORA (B).eaf	00:01:47.404000	GE	SWING/ROCK	1	1	1	0	0	1	0	0	0	JULIE	1	1	AFFILIATIVE
16_8_17 PANDORA (B).eaf	00:04:42.004000	FE	RASPBERRY FACE	1	1	1	1	0	0	1	1	1	BEN	1	1	LOCOMOTION
16_8_17 PANDORA (B).eaf	00:04:47.296000	GE	PUSH	1	1	0	1	1	1	0	0	0	BEN	1	1	LOCOMOTION
16_8_17 SHAUN (A).eaf	00:05:04.079000	FE	LIPSMACKING FACE	1	1	1	1	1	1	0	1	1	SHAUN	0	1	GROOM
16_8_17 SHAUN (A).eaf	00:16:42.225000	GE	AMB TOUCH	0	1	1	0	0	1	1	1	1	JEAN	0	1	PLAY
16_8_17 SHAUN (A).eaf	00:17:24.149000	GE	AMB TOUCH	1	1	1	1	0	1	1	1	1	JEAN	1	1	PLAY
17_7_17 BEN (A)_2.eaf	00:07:46.296000	FE	AMBIGUOUS FACE	1	1	1	1	1	1	0	1	1	BEN	0	0	AGONISTIC
17_7_17 BEN (A)_2.eaf	00:07:47.350000	GE	SWING/ROCK	1	1	1	0	1	1	0	1	1	BEN	0	0	AGONISTIC
17_7_17 BEN (A)_2.eaf	00:08:37.405000	FE	LIPSMACKING FACE	1	1	1	0	0	1	0	0	0	JAKE	1	0	GROOM
17_7_17 BEN (A)_2.eaf	00:09:55.444000	GE	LOOK	1	1	0	1	0	1	0	1	1	KIMA	0	1	FOOD
17_7_17 BEN (A)_2.eaf	00:09:56.768000	GE	AMB TOUCH	1	1	0	0	1	1	0	1	1	KIMA	0	1	FOOD
17_7_17 JAKE (A)_2.eaf	00:16:58.452000	GE	SWING/ROCK	1	1	1	1	0	0	0	0	0	GLENN	1	0	AGONISTIC
17_7_17 JAKE (A)_2.eaf	00:18:32.571000	FE	RASPBERRY FACE	1	1	1	0	0	0	0	0	0	GLENN	1	0	AGONISTIC
17_7_17 JAKE (A)_2.eaf	00:18:51.566000	GE	SWING/ROCK	1	1	1	0	0	0	0	0	0	GLENN	1	0	AGONISTIC
17_7_17 JAKE (A)_2.eaf	00:19:04.404000	FE	PANT HOOT FACE	1	1	1	0	0	0	0	0	0	GLENN	1	0	AGONISTIC
17_7_17 JAKE (A)_2.eaf	00:19:14.242000	GE	TAP/SLAP/KNOCK OBJECT	1	1	0	0	0	0	0	0	0	GLENN	1	0	AGONISTIC
17_7_17 JAKE (A)_2.eaf	00:19:15.188000	GE	THROW OBJECT	1	1	0	1	0	0	0	0	0	GLENN	1	0	AGONISTIC
17_7_17 JAKE (A)_2.eaf	00:20:08.756000	FE	PANT HOOT FACE	1	1	1	1	1	1	0	1	1	NAN	0	1	AFFILIATIVE
17_7_17 JAKE (A)_2.eaf	00:20:13.485000	GE	PRESENT BODY PART	0	1	0	1	1	1	0	1	1	NAN	0	1	AFFILIATIVE
17_7_17 SHAUN (B).eaf	00:01:12.081000	GE	LOOK	1	1	1	1	1	1	0	1	1	ZURI	1	1	FOOD
18_7_17 JERRARD (A)_2.eaf	00:09:53.477000	GE	PUSH	0	1	1	1	0	1	0	1	1	GLENN	1	1	REST
18_7_17 JERRARD (A)_2.eaf	00:10:37.028000	GE	SLAP OTHER WITH OBJECT	1	1	1	1	0	1	0	1	1	JOHARI	1	1	PLAY
18_7_17 JERRARD (A)_2.eaf	00:10:42.541000	GE	AMB TOUCH	0	1	0	1	1	1	0	0	0	REGINA	1	1	PLAY
18_7_17 JERRARD (A)_2.eaf	00:11:33.929000	GE	REACH	1	1	1	1	0	1	0	1	1	REGINA	1	1	PLAY
18_7_17 JERRARD (A)_2.eaf	00:11:37.388000	FE	PLAY FACE	1	1	0	0	0	1	0	0	0	JOHARI	1	1	PLAY
18_7_17 JERRARD (A)_2.eaf	00:11:37.388000	GE	SLAP OTHER	1	1	1	0	0	1	0	0	0	JOHARI	1	1	PLAY
18_7_17 JERRARD (A)_2.eaf	00:16:10.790000	FE	PANT HOOT FACE	1	1	1	1	0	0	0	0	0	NAN	1	0	AROUSAL (GENERAL)
18_7_17 JERRARD (A)_2.eaf	00:16:12.810000	GE	EMBRACE	0	1	1	0	1	1	0	1	1	JOHARI	1	0	AROUSAL (GENERAL)
18_7_17 JULIE (A).eaf	00:04:22.701000	GE	DIRECTED PUSH	1	1	0	1	0	1	1	0	1	JULIE	1	1	LOCOMOTION
18_7_17 JULIE (A).eaf	00:04:55.296000	GE	AMB TOUCH	1	1	1	1	0	1	1	0	1	JULIE	1	1	LOCOMOTION
18_7_17 JULIE (A).eaf	00:05:02.972000	GE	AMB TOUCH	1	1	0	1	0	1	1	0	1	JULIE	1	1	LOCOMOTION
18_7_17 JULIE (A).eaf	00:14:19.457000	GE	PRESENT BODY PART	1	1	0	1	1	1	0	1	1	ZURI	1	1	AFFILIATIVE
18_7_17 JULIE (A).eaf	00:14:21.538000	GE	EMBRACE	1	1	1	0	0	1	0	0	0	JULIE	1	1	AFFILIATIVE
18_7_17 JULIE (A).eaf	00:14:22.917000	GE	SWING/ROCK	1	1	1	0	0	1	0	0	0	JULIE	1	1	AFFILIATIVE
18_7_17 OLIVER (A).eaf	00:01:00.892000	GE	PRESENT CLIMB ON ME	1	1	0	1	1	1	0	0	0	UKI	1	1	LOCOMOTION
18_7_17 OLIVER (A).eaf	00:04:40.837000	GE	DANGLE	1	1	1	1	1	1	0	1	1	OLIVER	1	1	PLAY
18_7_17 OLIVER (A).eaf	00:09:38.432000	GE	TANDEM WALK	1	1	1	1	1	1	1	1	1	JOHARI	1	1	LOCOMOTION
18_7_17 OLIVER (A).eaf	00:15:19.638000	GE	HAND FLING	1	1	0	0	1	1	1	0	1	JERRARD	0	1	LOCOMOTION
18_7_17 OLIVER (A).eaf	00:17:10.033000	GE	DANGLE	1	1	1	1	0	1	1	1	1	OLIVER	1	1	PLAY
18_7_17 OLIVER (A).eaf	00:17:25.330000	GE	REACH	1	1	1	0	0	1	0	1	1	OLIVER	1	1	PLAY
18_7_17 OLIVER (A).eaf	00:22:24.488000	GE	LOOK	1	1	1	0	0	1	0	1	1	KIMA	0	1	FOOD
18_7_17 OLIVER (A).eaf	00:22:46.163000	GE	LOOK	1	1	1	0	0	1	0	1	1	KIMA	0	1	FOOD
18_7_17 OLIVER (A).eaf	00:23:07.485000	GE	ARM RAISE	1	1	1	1	1	1	0	1	1	KIMA	1	1	PLAY
18_7_17 PANDORA (A).eaf	00:20:17.309000	GE	PUSH	1	1	1	1	1	1	1	1	1	GRACIE	1	1	LOCOMOTION
18_7_17 PANDORA (B).eaf	00:00:47.762000	FE	AMBIGUOUS FACE	1	1	1	1	0	1	1	1	1	GLENN	1	1	GROOM
18_7_17 PANDORA (B).eaf	00:00:54.046000	GE	SWING/ROCK	1	1	1	1	1	1	1	1	1	GLENN	1	1	GROOM
19_6_17 BEN (A)_2.eaf	00:21:09.891000	GE	AMB TOUCH	1	1	0	1	0	1	1	0	1	JULIE	1	1	GROOM
19_6_17 BEN (A)_2.eaf	00:21:13.674000	GE	PUSH	1	1	0	1	0	1	0	1	1	JULIE	1	1	GROOM
19_6_17 BEN (A)_2.eaf	00:21:16.485000	GE	AMB TOUCH	1	1	1	1	0	1	0	1	1	JULIE	1	1	GROOM
19_6_17 BEN (A)_2.eaf	00:22:48.377000	GE	AMB TOUCH	1	1	1	1	1	1	0	1	1	JULIE	1	1	AFFILIATIVE
19_6_17 BEN (A)_2.eaf	00:22:54.647000	GE	EMBRACE	0	1	1	1	1	1	0	0	0	JULIE	1	1	AFFILIATIVE
19_6_17 BEN (A)_2.eaf	00:22:58.675000	FE	POUT FACE	1	1	1	0	1	1	0	1	1	JOHARI	0	1	PLAY
19_6_17 BEN (A)_2.eaf	00:23:00.432000	GE	SWING/ROCK	1	1	1	0	1	1	0	1	1	JOHARI	0	1	PLAY
19_6_17 BEN (A)_2.eaf	00:23:32.999000	FE	PLAY FACE	1	1	1	1	0	1	0	1	1	JOHARI	1	1	PLAY
19_6_17 BEN (A)_2.eaf	00:23:33.918000	GE	SWING/ROCK	1	1	1	1	1	1	0	1	1	JOHARI	1	1	PLAY
19_6_17 BEN (A)_2.eaf	00:23:35.729000	GE	BITE	0	1	0	1	1	1	0	1	1	JULIE	1	1	PLAY
19_6_17 JEAN (A)_2.eaf	00:11:15.107000	FE	PLAY FACE	1	1	1	0	1	1	0	1	1	JOHARI	1	1	PLAY
19_6_17 JEAN (A)_2.eaf	00:11:15.864000	GE	SLAP OTHER WITH OBJECT	1	1	0	1	1	1	0	1	1	JOHARI	1	1	PLAY
19_6_17 JEAN (A)_2.eaf	00:11:17.891000	GE	AMB TOUCH	1	1	1	1	1	1	0	1	1	JOHARI	1	1	PLAY
19_6_17 JEAN (A)_2.eaf	00:14:36.512000	FE	LIPSMACKING FACE	1	1	1	0	1	1	0	0	0	SHAUN	1	0	GROOM
19_6_17 JOHARI (A)_2.eaf	00:06:40.876000	GE	LOOK	1	1	1	0	0	1	0	1	1	YOSHI	0	1	FOOD
19_6_17 JOHARI (A)_2.eaf	00:08:34.560000	GE	REACH	0	1	1	1	1	1	0	1	1	YOSHI	1	1	FOOD
19_6_17 JOHARI (A)_2.eaf	00:08:52.071000	GE	REACH	0	1	1	1	0	1	0	1	1	YOSHI	1	1	FOOD
19_6_17 JOHARI (A)_2.eaf	00:16:32.111000	GE	LOOK	1	1	1	1	0	1	0	1	1	JOHARI	0	1	FOOD
19_6_17 JOHARI (A)_2.eaf	00:18:30.233000	GE	AMB TOUCH	1	1	1	1	0	1	0	1	1	JOHARI	1	1	LOCOMOTION
19_6_17 JOHARI 2 (A)_2.eaf	00:01:54.302000	GE	PUSH	1	1	1	0	0	1	0	1	1	JOHARI	1	1	SEX
19_6_17 JOHARI 2 (A)_2.eaf	00:02:00.249000	GE	AMB TOUCH	1	1	1	1	0	1	0	1	1	JOHARI	1	1	SEX
19_6_17 JOHARI 2 (A)_2.eaf	00:02:42.058000	GE	PUSH	1	1	1	1	0	1	0	1	1	JOHARI	1	1	SEX
19_6_17 JOHARI 2 (A)_2.eaf	00:21:30.079000	GE	AMB TOUCH	1	1	1	1	1	1	0	1	1	ZOE	1	1	LOCOMOTION
19_6_17 ZOE (B).eaf	00:02:44.567000	GE	AMB TOUCH	1	1	1	1	0	1	0	1	1	JOHARI	1	1	LOCOMOTION
19_6_17 ZOE (B).eaf	00:02:45.269000	GE	KICK	1	1	1	1	0	1	0	1	1	JOHARI	1	1	LOCOMOTION
19_7_17 JOHARI (B).eaf	00:03:24.751000	GE	AMB TOUCH	0	1	1	1	1	1	0	1	1	REGINA	1	1	AFFILIATIVE
19_7_17 REGINA (A).eaf	00:09:50.082000	GE	SWING/ROCK	1	1	1	1	1	1	0	1	1	GLENN	1	1	SEX
19_7_17 REGINA (A).eaf	00:09:52.419000	GE	PRESENT BODY PART	1	1	1	1	1	1	0	1	1	REGINA	1	1	SEX
19_7_17 REGINA (B).eaf	00:00:40.242000	GE	AMB TOUCH	0	1	1	1	0	1	0	0	0	JERRARD	1	0	LOCOMOTION
19_7_17 REGINA (B).eaf	00:01:17.147000	FE	LIPSMACKING FACE	0	1	1	0	0	1	0	0	0	SHAUN	1	0	GROOM
19_7_17 ZOE (A).eaf	00:02:48.405000	GE	AMB TOUCH	1	1	1	1	1	1	0	1	1	ZOE	1	1	LOCOMOTION
19_7_17 ZOE (A).eaf	00:19:54.810000	FE	BARED TEETH FACE	1	1	1	1	1	1	1	1	1	KIMA	1	1	FOOD
19_7_17 ZOE (A).eaf	00:20:03.675000	GE	ROLL OVER	1	1	1	1	1	1	0	1	1	KIMA	1	1	FOOD
2_8_17 GRACIE (A)_2.eaf	00:02:18.891000	FE	PANT HOOT FACE	1	1	1	1	0	0	0	0	0	GRACIE	1	0	AROUSAL (GENERAL)
2_8_17 GRACIE (A)_2.eaf	00:07:34.864000	FE	PANT HOOT FACE	1	1	1	0	0	0	0	0	0	GRACIE	0	0	AROUSAL (GENERAL)
2_8_17 GRACIE (A)_2.eaf	00:11:29.765000	GE	LOOK	1	1	1	1	0	1	0	1	1	GRACIE	0	1	FOOD
2_8_17 GRACIE (A)_2.eaf	00:14:40.165000	GE	LOOK	0	1	1	0	0	1	0	1	1	YOSHI	0	1	FOOD
2_8_17 GRACIE (A)_2.eaf	00:21:43.993000	GE	ROLL OVER	0	1	1	1	1	1	0	1	1	KIMA	1	1	PLAY
2_8_17 GRACIE (A)_2.eaf	00:21:49.723000	GE	SLAP OTHER WITH OBJECT	1	1	1	1	1	1	0	1	1	BEN	1	1	PLAY
2_8_17 GRACIE (A)_2.eaf	00:22:22.741000	GE	LOOK	1	1	1	1	0	1	0	1	1	GLENN	1	1	FOOD
2_8_17 GRACIE (A)_2.eaf	00:22:51.634000	GE	AMB TOUCH	1	1	0	1	0	1	0	0	0	BEN	1	1	AFFILIATIVE
2_8_17 GRACIE (B)_2.eaf	00:00:04.594000	FE	AMBIGUOUS FACE	0	1	1	0	0	1	1	1	1	BEN	1	1	LOCOMOTION
2_8_17 GRACIE (B)_2.eaf	00:00:11.729000	FE	AMBIGUOUS FACE	0	1	1	1	1	1	0	1	1	BEN	1	1	LOCOMOTION
2_8_17 GRACIE (B)_2.eaf	00:00:31.864000	GE	ROLL OVER	0	1	1	1	1	1	0	1	1	KIMA	1	1	PLAY
2_8_17 GRACIE (B)_2.eaf	00:00:42.242000	FE	RASPBERRY FACE	1	1	1	1	0	1	0	1	1	PANDORA	1	1	GROOM
2_8_17 GRACIE (B)_2.eaf	00:01:46.512000	GE	AMB TOUCH	1	1	1	1	0	1	0	1	1	BEN	1	1	PLAY
2_8_17 GRACIE (B)_2.eaf	00:03:10.026000	GE	AMB TOUCH	1	1	1	1	0	1	0	1	1	BEN	1	1	PLAY
2_8_17 KIMA (A).eaf	00:08:22.134000	FE	RASPBERRY FACE	1	1	1	0	0	1	0	1	1	SHAUN	0	1	REST
2_8_17 KIMA (A).eaf	00:09:29.810000	GE	PUSH	0	1	0	1	1	1	0	0	0	JERRARD	1	1	GROOM
2_8_17 KIMA (A).eaf	00:10:23.296000	FE	RASPBERRY FACE	1	1	1	0	0	0	0	1	1	SHAUN	0	1	GROOM
2_8_17 KIMA (A).eaf	00:11:07.296000	FE	RASPBERRY FACE	1	1	1	1	0	1	1	1	1	SHAUN	1	1	GROOM
2_8_17 KIMA (A).eaf	00:11:37.269000	FE	LIPSMACKING FACE	1	1	1	0	0	1	0	1	1	SHAUN	1	1	GROOM
2_8_17 KIMA (A).eaf	00:11:43.972000	FE	RASPBERRY FACE	1	1	1	0	0	1	0	1	1	SHAUN	1	1	GROOM
2_8_17 KIMA (A).eaf	00:12:13.432000	FE	RASPBERRY FACE	1	1	1	0	0	0	0	1	1	SHAUN	1	1	GROOM
2_8_17 KIMA (A).eaf	00:20:50.377000	GE	AMB TOUCH	1	1	1	1	1	1	1	0	1	JOHARI	1	1	PLAY
2_8_17 KIMA (A).eaf	00:20:52.621000	FE	PLAY FACE	1	1	1	1	1	1	0	0	0	SHAUN	1	1	PLAY
2_8_17 KIMA (A).eaf	00:20:54.324000	FE	PLAY FACE	1	1	1	1	1	1	1	1	1	JOHARI	1	1	PLAY
2_8_17 KIMA (A).eaf	00:20:55.701000	GE	AMB TOUCH	1	1	1	1	1	1	1	1	1	JOHARI	1	1	PLAY
2_8_17 KIMA (A).eaf	00:21:08.620000	GE	AMB TOUCH	1	1	1	1	1	1	1	1	1	JOHARI	1	1	PLAY
2_8_17 KIMA (A).eaf	00:21:09.134000	FE	PLAY FACE	1	1	1	1	1	1	0	1	1	SHAUN	1	1	PLAY
2_8_17 KIMA (A).eaf	00:21:10.350000	GE	BITE	1	1	1	1	1	1	1	1	1	JOHARI	1	1	PLAY
2_8_17 KIMA (A).eaf	00:21:24.972000	GE	ROLL OVER	1	1	0	1	1	1	0	0	0	JOHARI	1	1	PLAY
20_6_17 JULIE (A).eaf	00:01:29.971000	FE	PANT HOOT FACE	1	1	1	1	0	0	0	0	0	NAN	1	0	AROUSAL (GENERAL)
20_6_17 JULIE (A).eaf	00:17:47.050000	GE	LOOK	1	1	1	1	0	1	0	1	1	UKI	0	1	FOOD
20_6_17 OLIVER (A).eaf	00:03:33.539000	GE	PUSH	1	1	0	1	0	1	0	0	0	JULIE	1	1	LOCOMOTION
20_6_17 REGINA (A).eaf	00:07:21.377000	FE	PANT HOOT FACE	1	1	1	0	0	0	0	0	0	REGINA	1	0	AROUSAL (GENERAL)
20_6_17 REGINA (A).eaf	00:07:33.107000	GE	AMB TOUCH	1	1	0	0	1	1	0	0	0	REGINA	1	0	AROUSAL (GENERAL)
20_6_17 REGINA (A).eaf	00:07:34.080000	GE	PUNCH OTHER	1	1	0	1	1	1	0	0	0	REGINA	1	0	AROUSAL (GENERAL)
20_6_17 REGINA (A).eaf	00:07:39.675000	FE	BARED TEETH FACE	1	1	1	1	0	0	0	0	0	REGINA	1	0	AROUSAL (GENERAL)
20_6_17 REGINA (A).eaf	00:16:50.756000	GE	AMB TOUCH	1	1	1	1	1	1	0	1	1	REGINA	1	1	AFFILIATIVE
20_6_17 YOSHI (A).eaf	00:10:30.702000	FE	BARED TEETH FACE	1	1	1	0	0	0	0	0	0	REGINA	0	0	REST
20_6_17 YOSHI (B).eaf	00:02:47.982000	GE	AMB TOUCH	1	1	0	1	1	1	0	0	0	GLENN	1	1	LOCOMOTION
20_7_17 JEAN (A)_2.eaf	00:04:25.627000	GE	ARM RAISE	1	1	1	1	1	1	0	1	1	UKI	1	1	SEX
20_7_17 YOSHI (B).eaf	00:01:03.080000	GE	PUNCH OTHER	1	1	1	1	0	1	1	1	1	JULIE	1	1	LOCOMOTION
20_7_17 YOSHI (B).eaf	00:01:09.755000	GE	PUSH	1	1	1	1	0	1	1	1	1	JULIE	1	1	LOCOMOTION
20_7_17 YOSHI (B).eaf	00:01:19.188000	GE	AMB TOUCH	1	1	1	1	0	1	1	1	1	JULIE	1	1	LOCOMOTION
20_7_17 YOSHI (B).eaf	00:01:34.351000	FE	POUT FACE	1	1	1	0	0	1	0	0	0	JOHARI	1	1	LOCOMOTION
21_6_17 UKI (A).eaf	00:00:49.389000	GE	OBJECT MOVE	1	1	1	1	1	1	1	1	1	ZURI	1	1	PLAY
21_6_17 UKI (A).eaf	00:00:54.848000	GE	AMB TOUCH	1	1	0	1	1	1	1	0	1	ZURI	1	1	PLAY
21_6_17 UKI (A).eaf	00:05:40.269000	GE	SLAP OTHER WITH OBJECT	1	1	1	1	1	1	0	1	1	JOHARI	0	1	PLAY
21_6_17 UKI (A).eaf	00:06:15.644000	GE	PIROUETTE	1	1	1	0	0	1	1	0	1	UKI	1	1	PLAY
21_6_17 UKI (A).eaf	00:06:26.756000	GE	PRESENT CLIMB ON ME	1	1	1	1	1	1	0	1	1	UKI	1	1	PLAY
21_6_17 UKI (A).eaf	00:06:30.270000	GE	AMB TOUCH	1	1	0	1	1	1	0	1	1	JULIE	1	1	PLAY
21_6_17 UKI (A).eaf	00:09:41.242000	GE	TAP/SLAP/KNOCK OBJECT	1	1	1	1	0	1	1	0	1	UKI	1	1	PLAY
21_6_17 UKI (A).eaf	00:09:43.674000	GE	TAP/SLAP/KNOCK OBJECT	1	1	1	1	0	1	1	1	1	UKI	1	1	PLAY
21_6_17 UKI (A).eaf	00:09:55.486000	GE	TAP/SLAP/KNOCK OBJECT	1	1	1	1	0	1	1	1	1	UKI	1	1	PLAY
21_6_17 UKI (A).eaf	00:10:08.603000	FE	LOWER LIP RELAXER FACE	1	1	1	1	0	1	0	1	1	UKI	1	1	PLAY
21_6_17 UKI (A).eaf	00:14:35.941000	GE	SLAP OTHER WITH OBJECT	1	1	1	1	1	1	0	1	1	JOHARI	1	1	PLAY
21_6_17 UKI (A).eaf	00:14:37.211000	GE	SLAP OTHER WITH OBJECT	1	1	1	1	1	1	0	1	1	UKI	1	1	PLAY
21_6_17 UKI (B).eaf	00:05:45.039000	FE	LOWER LIP RELAXER FACE	1	1	1	1	1	1	0	1	1	UKI	1	1	LOCOMOTION
21_6_17 ZURI (A).eaf	00:02:23.918000	GE	TAP/SLAP/KNOCK OBJECT	1	1	1	1	0	1	1	1	1	ZURI	1	1	PLAY
21_6_17 ZURI (A).eaf	00:02:33.316000	GE	TAP/SLAP/KNOCK OBJECT	1	1	1	1	0	1	1	1	1	ZURI	1	1	PLAY
21_6_17 ZURI (A).eaf	00:02:48.878000	GE	TAP/SLAP/KNOCK OBJECT	1	1	1	1	0	1	0	1	1	ZURI	1	1	PLAY
21_6_17 ZURI (A).eaf	00:02:56.169000	GE	DANGLE	1	1	1	1	0	1	0	1	1	ZURI	1	1	PLAY
21_6_17 ZURI (A).eaf	00:03:38.578000	GE	TAP/SLAP/KNOCK OBJECT	1	1	1	0	0	1	1	1	1	ZURI	1	1	PLAY
21_6_17 ZURI (A).eaf	00:04:40.613000	GE	TAP/SLAP/KNOCK OBJECT	1	1	1	0	0	1	0	1	1	ZURI	1	1	PLAY
21_6_17 ZURI (A).eaf	00:04:45.086000	FE	PLAY FACE	1	1	1	0	0	1	0	1	1	ZURI	1	1	PLAY
21_6_17 ZURI (A).eaf	00:05:43.490000	FE	PLAY FACE	1	1	1	1	1	1	1	1	1	OLIVER	1	1	PLAY
21_6_17 ZURI (A).eaf	00:05:53.045000	GE	TAP/SLAP/KNOCK OBJECT	1	1	1	1	1	1	0	0	0	ZURI	1	1	PLAY
21_6_17 ZURI (A).eaf	00:05:53.991000	GE	AMB TOUCH	1	1	0	1	1	1	0	0	0	OLIVER	1	1	PLAY
21_6_17 ZURI (A).eaf	00:06:28.557000	GE	TAP/SLAP/KNOCK OBJECT	1	1	1	0	0	1	0	1	1	ZURI	1	1	PLAY
21_6_17 ZURI (A).eaf	00:06:32.773000	GE	JUMP	1	1	0	0	0	1	1	0	1	ZURI	1	1	PLAY
21_6_17 ZURI (A).eaf	00:06:49.054000	FE	PLAY FACE	1	1	1	1	1	1	1	1	1	ZURI	1	1	PLAY
21_6_17 ZURI (A).eaf	00:06:51.946000	GE	SLAP OTHER	1	1	1	1	1	1	1	1	1	ZURI	1	1	PLAY
21_6_17 ZURI (A).eaf	00:13:13.630000	GE	PRESENT CLIMB ON ME	1	1	0	0	1	1	0	1	1	ZURI	1	1	LOCOMOTION
21_6_17 ZURI (A).eaf	00:13:14.008000	FE	PANT HOOT FACE	1	1	0	1	1	1	1	0	1	ZURI	1	1	LOCOMOTION
21_6_17 ZURI (A).eaf	00:15:09.939000	GE	AMB TOUCH	1	1	1	1	0	1	0	1	1	JOHARI	1	1	LOCOMOTION
21_6_17 ZURI (A).eaf	00:21:22.490000	GE	CLAP	1	1	1	1	1	1	1	1	1	ZURI	1	1	PLAY
21_6_17 ZURI (A).eaf	00:21:30.488000	GE	CLAP	0	1	1	1	1	1	0	0	0	OLIVER	1	1	PLAY
21_7_17 ZURI (A).eaf	00:09:50.761000	GE	THROW OBJECT	1	1	1	1	0	1	1	1	1	JOHARI	1	1	PLAY
21_7_17 ZURI (A).eaf	00:09:58.167000	GE	THROW OBJECT	1	1	1	1	0	1	1	1	1	JOHARI	1	1	PLAY
21_7_17 ZURI (A).eaf	00:10:00.977000	GE	HAND FLING	1	1	0	1	1	1	1	0	1	PANDORA	1	1	PLAY
21_7_17 ZURI (A).eaf	00:10:01.058000	FE	PANT HOOT FACE	1	1	0	1	1	1	1	1	1	PANDORA	1	1	PLAY
21_7_17 ZURI (A).eaf	00:10:03.166000	GE	THROW OBJECT	1	1	1	1	1	1	1	1	1	JOHARI	1	1	PLAY
21_7_17 ZURI (A).eaf	00:10:06.788000	GE	THROW OBJECT	1	1	1	1	0	1	0	1	1	JOHARI	1	1	PLAY
24_7_17 JAKE (A)_2.eaf	00:13:57.579000	FE	LOWER LIP RELAXER FACE	1	1	1	0	0	1	0	1	1	UKI	0	1	FOOD
24_7_17 JAKE (A)_2.eaf	00:13:57.579000	GE	LOOK	1	1	1	0	0	1	0	1	1	UKI	0	1	FOOD
24_7_17 JERRARD (A)_2.eaf	00:15:50.675000	GE	HAND FLING	1	1	0	1	1	1	1	0	1	JERRARD	1	1	FOOD
24_7_17 JERRARD (A)_2.eaf	00:15:52.377000	GE	AMB TOUCH	1	1	0	1	0	1	1	0	1	JERRARD	1	1	FOOD
24_7_17 JERRARD (A)_2.eaf	00:16:01.269000	GE	AMB TOUCH	0	1	1	1	0	1	0	1	1	JERRARD	1	1	FOOD
24_7_17 JERRARD (B)_2.eaf	00:00:05.297000	FE	RASPBERRY FACE	1	1	1	0	0	1	0	0	0	BEN	1	1	GROOM
24_7_17 SHAUN (A).eaf	00:01:35.431000	GE	AMB TOUCH	1	1	0	1	1	1	0	0	0	OLIVER	1	1	AFFILIATIVE
24_7_17 SHAUN (A).eaf	00:01:43.021000	GE	PUSH	1	1	1	0	0	1	0	1	1	JULIE	1	1	LOCOMOTION
24_7_17 SHAUN (A).eaf	00:01:50.237000	GE	PUSH	1	1	1	0	0	1	0	1	1	JULIE	1	1	LOCOMOTION
24_7_17 SHAUN (A).eaf	00:01:54.710000	GE	AMB TOUCH	1	1	1	1	0	1	0	1	1	JULIE	1	1	LOCOMOTION
24_7_17 SHAUN (A).eaf	00:04:22.147000	FE	BARED TEETH FACE	1	1	1	1	0	1	0	0	0	GRACIE	1	0	LOCOMOTION
24_7_17 SHAUN (A).eaf	00:04:27.859000	GE	EMBRACE	1	1	1	1	1	1	0	1	1	JULIE	1	1	AFFILIATIVE
24_7_17 SHAUN (A).eaf	00:04:29.913000	GE	SWING/ROCK	1	1	1	1	1	1	0	0	0	JULIE	1	1	AFFILIATIVE
24_7_17 SHAUN (A).eaf	00:13:18.241000	FE	RASPBERRY FACE	0	1	1	1	1	1	0	1	1	PANDORA	1	1	GROOM
24_7_17 SHAUN (A).eaf	00:13:45.377000	FE	RASPBERRY FACE	1	1	1	1	1	1	0	1	1	PANDORA	1	1	GROOM
24_7_17 SHAUN (A).eaf	00:16:48.548000	FE	RASPBERRY FACE	1	1	1	0	0	1	1	1	1	PANDORA	0	1	GROOM
26_6_17 BEN (A)_2.eaf	00:11:02.930000	FE	LIPSMACKING FACE	0	1	1	0	0	1	0	0	0	JAKE	1	1	GROOM
26_6_17 BEN (A)_2.eaf	00:15:16.080000	FE	PANT HOOT FACE	1	1	1	1	0	0	0	0	0	BEN	0	0	AROUSAL (GENERAL)
26_6_17 NAN (A)_2.eaf	00:07:17.485000	FE	PANT HOOT FACE	1	1	1	1	0	0	0	0	0	NAN	1	0	AROUSAL (GENERAL)
26_6_17 NAN (A)_2.eaf	00:12:48.404000	FE	PANT HOOT FACE	1	1	1	0	0	0	0	0	0	NAN	1	0	FOOD
26_6_17 NAN (A)_2.eaf	00:12:55.810000	GE	AMB TOUCH	1	1	0	1	1	1	0	0	0	NAN	1	0	FOOD
26_7_17 GLENN 1 (A)_2.eaf	00:15:15.039000	FE	PANT HOOT FACE	1	1	1	1	0	0	0	0	0	GLENN	1	0	AROUSAL (GENERAL)
26_7_17 GLENN 1 (A)_2.eaf	00:15:22.457000	GE	SWING/ROCK	1	1	1	1	1	1	0	1	1	GLENN	1	0	AROUSAL (GENERAL)
26_7_17 GLENN 1 (B)_2.eaf	00:05:21.146000	GE	SWING/ROCK	1	1	1	1	1	1	0	1	1	JERRARD	1	0	AROUSAL (GENERAL)
26_7_17 GLENN 1 (B)_2.eaf	00:05:28.835000	FE	AMBIGUOUS FACE	1	1	1	1	1	1	1	1	1	BEN	1	0	AROUSAL (GENERAL)
26_7_17 GLENN 1 (B)_2.eaf	00:05:32.646000	GE	AMB TOUCH	1	1	1	1	1	1	0	1	1	BEN	1	0	AROUSAL (GENERAL)
26_7_17 GLENN 1 (B)_2.eaf	00:05:34.551000	GE	AMB TOUCH	1	1	1	1	0	1	0	1	1	JERRARD	1	0	AROUSAL (GENERAL)
26_7_17 GLENN 1 (B)_2.eaf	00:05:36.294000	GE	EMBRACE	1	1	0	1	1	1	0	0	0	BEN	1	0	AROUSAL (GENERAL)
26_7_17 GLENN 2 (A)_2.eaf	00:02:02.026000	FE	AMBIGUOUS FACE	1	1	1	0	1	1	0	1	1	BEN	1	1	AFFILIATIVE
26_7_17 GLENN 2 (A)_2.eaf	00:02:04.134000	GE	AMB TOUCH	1	1	1	1	1	1	0	1	1	BEN	1	1	AFFILIATIVE
26_7_17 GLENN 2 (A)_2.eaf	00:02:11.891000	GE	EMBRACE	1	1	1	1	0	1	0	0	0	BEN	1	1	AFFILIATIVE
26_7_17 GLENN 2 (A)_2.eaf	00:02:15.702000	GE	EMBRACE	1	1	0	1	0	1	0	0	0	BEN	1	1	AFFILIATIVE
26_7_17 JOHARI (A).eaf	00:01:13.161000	GE	TAP/SLAP/KNOCK OBJECT	1	1	1	0	0	1	1	1	1	JOHARI	1	1	PLAY
26_7_17 JOHARI (A).eaf	00:01:19.783000	GE	PUNCH OTHER	1	1	1	1	1	1	0	1	1	JOHARI	1	1	PLAY
26_7_17 JOHARI (A).eaf	00:01:24.918000	GE	SLAP OTHER	1	1	1	1	1	1	1	1	1	JOHARI	1	1	PLAY
26_7_17 JOHARI (A).eaf	00:01:28.188000	FE	PLAY FACE	1	1	1	1	1	1	1	1	1	JOHARI	1	1	PLAY
26_7_17 JOHARI (A).eaf	00:01:42.080000	GE	PIROUETTE	1	1	1	1	0	1	1	0	1	JOHARI	1	1	PLAY
26_7_17 JOHARI (A).eaf	00:01:50.593000	GE	AMB TOUCH	1	1	1	1	1	1	1	1	1	JOHARI	1	1	PLAY
26_7_17 JOHARI (A).eaf	00:02:07.458000	GE	AMB TOUCH	1	1	1	1	0	1	1	0	1	JOHARI	1	1	PLAY
26_7_17 JOHARI (A).eaf	00:02:14.053000	GE	SLAP OTHER	1	1	1	1	1	1	0	1	1	JOHARI	1	1	PLAY
26_7_17 JOHARI (A).eaf	00:02:20.972000	GE	BITE	1	1	1	1	1	1	1	1	1	JOHARI	1	1	PLAY
26_7_17 JOHARI (A).eaf	00:02:29.729000	GE	BITE	1	1	1	1	1	1	1	1	1	JOHARI	1	1	PLAY
26_7_17 JOHARI (A).eaf	00:02:30.161000	FE	PLAY FACE	1	1	1	1	1	1	0	1	1	UKI	1	1	PLAY
26_7_17 JOHARI (A).eaf	00:02:33.026000	GE	AMB TOUCH	1	1	1	1	1	1	1	1	1	JOHARI	1	1	PLAY
26_7_17 JOHARI (A).eaf	00:02:35.107000	FE	PLAY FACE	1	1	1	1	1	1	0	1	1	JOHARI	1	1	PLAY
26_7_17 JOHARI (A).eaf	00:02:43.783000	GE	SWING/ROCK	1	1	1	1	1	1	0	1	1	JOHARI	1	1	PLAY
26_7_17 JOHARI (A).eaf	00:02:45.566000	FE	PLAY FACE	1	1	1	1	1	1	0	1	1	UKI	1	1	PLAY
26_7_17 JOHARI (A).eaf	00:02:49.324000	GE	SLAP OTHER	1	1	1	1	1	1	0	1	1	JOHARI	1	1	PLAY
26_7_17 JOHARI (A).eaf	00:02:56.729000	GE	SWING/ROCK	1	1	1	1	1	1	0	1	1	JOHARI	1	1	PLAY
26_7_17 JOHARI (A).eaf	00:03:03.405000	GE	AMB TOUCH	1	1	0	1	1	1	1	0	1	JOHARI	1	1	PLAY
26_7_17 JOHARI (A).eaf	00:03:05.161000	GE	BITE	1	1	1	1	1	1	0	0	0	UKI	1	1	PLAY
26_7_17 JOHARI (A).eaf	00:03:11.053000	FE	PLAY FACE	1	1	1	1	1	1	0	1	1	UKI	1	1	PLAY
26_7_17 JOHARI (A).eaf	00:03:11.269000	GE	SLAP OTHER	1	1	1	1	1	1	0	1	1	UKI	1	1	PLAY
26_7_17 JOHARI (A).eaf	00:03:22.351000	GE	AMB TOUCH	1	1	1	1	0	1	0	1	1	JOHARI	1	1	PLAY
26_7_17 JOHARI (A).eaf	00:03:26.945000	FE	PLAY FACE	1	1	1	1	0	1	0	1	1	JOHARI	1	1	PLAY
26_7_17 JOHARI (A).eaf	00:03:28.269000	GE	AMB TOUCH	1	1	0	1	0	1	1	0	1	JOHARI	1	1	PLAY
26_7_17 JOHARI (A).eaf	00:09:08.189000	GE	TAP/SLAP/KNOCK OBJECT	1	1	1	1	1	1	1	1	1	JOHARI	1	1	PLAY
26_7_17 JOHARI (A).eaf	00:09:21.161000	GE	TAP/SLAP/KNOCK OBJECT	0	1	1	0	0	1	1	1	1	JOHARI	1	1	PLAY
26_7_17 JOHARI (A).eaf	00:14:03.621000	GE	BITE	1	1	1	1	0	1	0	0	0	JULIE	1	1	FOOD
26_7_17 JOHARI (A).eaf	00:14:24.702000	GE	BITE	1	1	1	1	0	1	0	1	1	JULIE	1	1	FOOD
26_7_17 JOHARI (A).eaf	00:15:20.864000	GE	AMB TOUCH	1	1	1	1	0	1	0	0	0	JULIE	1	0	FOOD
26_7_17 JOHARI (A).eaf	00:15:24.053000	GE	BITE	1	1	1	1	0	1	0	0	0	JULIE	1	0	FOOD
26_7_17 PANDORA (A).eaf	00:03:15.728000	FE	RASPBERRY FACE	1	1	1	1	0	1	0	1	1	BEN	1	1	AGONISTIC
26_7_17 PANDORA (A).eaf	00:03:28.080000	GE	SWING/ROCK	1	1	1	1	0	1	1	1	1	BEN	1	1	AGONISTIC
26_7_17 PANDORA (A).eaf	00:03:40.702000	FE	PANT HOOT FACE	1	1	1	1	1	1	1	1	1	BEN	1	1	AGONISTIC
26_7_17 PANDORA (A).eaf	00:03:56.891000	GE	CLAP	1	1	1	1	1	1	0	1	1	BEN	1	1	AGONISTIC
26_7_17 PANDORA (A).eaf	00:03:57.945000	GE	PRESENT BODY PART	1	1	0	1	1	1	0	1	1	SHAUN	1	1	AGONISTIC
26_7_17 PANDORA (A).eaf	00:03:59.918000	FE	SCREAM FACE	1	1	1	1	0	0	0	0	0	SHAUN	1	1	AGONISTIC
26_7_17 PANDORA (A).eaf	00:06:44.242000	FE	PANT HOOT FACE	1	1	1	0	0	1	1	1	1	JERRARD	1	1	AROUSAL (GENERAL)
26_7_17 PANDORA (A).eaf	00:06:45.459000	FE	PANT HOOT FACE	1	1	1	0	0	1	1	1	1	GRACIE	1	1	AROUSAL (GENERAL)
26_7_17 PANDORA (A).eaf	00:06:46.324000	FE	PANT HOOT FACE	1	1	0	0	0	1	1	1	1	PANDORA	1	1	AROUSAL (GENERAL)
26_7_17 PANDORA (A).eaf	00:06:46.404000	GE	HAND FLING	1	1	0	1	1	1	1	0	1	GRACIE	1	1	AROUSAL (GENERAL)
26_7_17 PANDORA (A).eaf	00:07:19.810000	FE	RASPBERRY FACE	1	1	0	0	0	1	0	0	0	GRACIE	1	0	GROOM
26_7_17 PANDORA (A).eaf	00:10:11.323000	FE	PANT HOOT FACE	1	1	1	1	0	0	0	0	0	JERRARD	0	0	AROUSAL (GENERAL)
26_7_17 PANDORA (A).eaf	00:10:40.242000	FE	PANT HOOT FACE	1	1	1	0	0	0	0	0	0	JERRARD	0	0	AROUSAL (GENERAL)
26_7_17 PANDORA (A).eaf	00:11:22.351000	FE	PANT HOOT FACE	1	1	1	1	0	0	1	0	1	BEN	1	0	AROUSAL (GENERAL)
26_7_17 PANDORA (A).eaf	00:11:36.486000	FE	PANT HOOT FACE	1	1	1	1	0	0	0	1	1	JERRARD	1	0	AROUSAL (GENERAL)
26_7_17 PANDORA (A).eaf	00:12:05.837000	FE	PANT HOOT FACE	1	1	1	1	0	0	0	0	0	PANDORA	1	0	AROUSAL (GENERAL)
26_7_17 PANDORA (A).eaf	00:12:06.134000	FE	PANT HOOT FACE	1	1	1	0	1	1	1	1	1	JULIE	1	0	AROUSAL (GENERAL)
26_7_17 PANDORA (A).eaf	00:12:09.918000	GE	HAND FLING	1	1	0	1	1	1	1	0	1	JULIE	1	0	AROUSAL (GENERAL)
26_7_17 PANDORA (A).eaf	00:12:54.629000	GE	AMB TOUCH	1	1	0	0	1	1	0	1	1	KIMA	0	1	AFFILIATIVE
26_7_17 PANDORA (A).eaf	00:14:49.306000	FE	RASPBERRY FACE	1	1	1	0	0	0	0	0	0	JERRARD	0	1	GROOM
26_7_17 PANDORA (A).eaf	00:15:21.596000	FE	PANT HOOT FACE	1	1	1	1	0	0	0	0	0	JERRARD	1	0	AROUSAL (GENERAL)
26_7_17 PANDORA (A).eaf	00:17:44.666000	FE	BARED TEETH FACE	1	1	1	1	1	1	0	1	1	JEAN	1	1	AGONISTIC
26_7_17 PANDORA (A).eaf	00:18:03.758000	GE	SLAP OTHER	1	1	1	1	1	1	1	0	1	KIMA	1	1	AGONISTIC
26_7_17 PANDORA (A).eaf	00:18:03.967000	FE	PLAY FACE	1	1	1	1	1	1	0	1	1	KIMA	1	1	AGONISTIC
26_7_17 PANDORA (A).eaf	00:18:04.274000	FE	BARED TEETH FACE	1	1	1	1	0	0	0	1	1	JEAN	1	1	AGONISTIC
26_7_17 PANDORA (A).eaf	00:18:13.306000	GE	AMB TOUCH	1	1	1	1	1	1	0	1	1	JERRARD	1	1	AGONISTIC
26_7_17 PANDORA (A).eaf	00:18:15.482000	GE	AMB TOUCH	1	1	1	1	0	1	1	1	1	JERRARD	1	1	AGONISTIC
26_7_17 PANDORA (A).eaf	00:18:16.692000	GE	BITE	1	1	1	1	1	1	0	0	0	KIMA	1	1	AGONISTIC
26_7_17 PANDORA (A).eaf	00:18:23.612000	FE	PLAY FACE	1	1	1	1	1	1	0	1	1	KIMA	1	1	AGONISTIC
26_7_17 PANDORA (A).eaf	00:18:25.580000	GE	SLAP OTHER	1	1	0	1	1	1	0	1	1	KIMA	1	1	AGONISTIC
26_7_17 PANDORA (A).eaf	00:18:25.595000	FE	BARED TEETH FACE	1	1	1	1	1	1	0	0	0	JEAN	1	1	AGONISTIC
26_7_17 PANDORA (A).eaf	00:18:33.822000	GE	SLAP OTHER	0	1	1	1	0	1	1	1	1	JERRARD	1	1	AGONISTIC
26_7_17 PANDORA (A).eaf	00:19:11.241000	GE	EMBRACE	1	1	1	1	0	1	0	0	0	JULIE	1	1	AFFILIATIVE
26_7_17 PANDORA (A).eaf	00:19:12.499000	GE	SWING/ROCK	1	1	1	0	0	1	0	0	0	JULIE	1	1	AFFILIATIVE
26_7_7 ZOE (A).eaf	00:14:18.345000	GE	REACH	1	1	1	1	1	1	0	1	1	REGINA	1	1	SEX
26_7_7 ZOE (A).eaf	00:14:19.754000	FE	AMBIGUOUS FACE	1	1	1	1	1	1	0	1	1	REGINA	1	1	SEX
26_7_7 ZOE (A).eaf	00:14:30.587000	GE	AMB TOUCH	1	0	1	1	1	1	1	0	1	REGINA	1	1	SEX
26_7_7 ZOE (A).eaf	00:14:43.393000	FE	AMBIGUOUS FACE	1	1	1	1	0	1	0	1	1	REGINA	1	1	SEX
26_7_7 ZOE (A).eaf	00:14:45.999000	GE	PUSH	1	1	1	1	1	1	0	1	1	JOHARI	1	1	SEX
26_7_7 ZOE (A).eaf	00:14:48.075000	GE	KICK	1	1	1	1	1	1	0	1	1	JOHARI	1	1	SEX
26_7_7 ZOE (A).eaf	00:14:50.848000	GE	PRESENT SEXUAL	0	1	1	1	0	1	1	0	1	REGINA	1	1	SEX
26_7_7 ZOE (A).eaf	00:21:14.128000	GE	LOOK	1	1	1	0	1	1	0	1	1	OLIVER	0	1	FOOD
27_6_17 JERRARD 1 (A)_2.eaf	00:05:33.269000	GE	REACH	1	1	1	1	1	1	1	1	1	ZURI	1	1	AGONISTIC
27_6_17 JERRARD 1 (A)_2.eaf	00:05:33.323000	FE	BARED TEETH FACE	1	1	1	1	1	1	0	1	1	ZURI	1	1	AGONISTIC
27_6_17 JERRARD 1 (A)_2.eaf	00:06:16.540000	FE	SCREAM FACE	1	1	1	1	0	0	0	0	0	JERRARD	1	1	AGONISTIC
27_6_17 JERRARD 1 (A)_2.eaf	00:06:28.783000	FE	SCREAM FACE	1	1	1	1	1	0	0	0	0	BEN	1	1	AGONISTIC
27_6_17 JERRARD 1 (A)_2.eaf	00:06:29.729000	FE	PANT HOOT FACE	1	1	1	1	0	0	0	0	0	JERRARD	1	1	AGONISTIC
27_6_17 JERRARD 1 (A)_2.eaf	00:06:30.945000	GE	AMB TOUCH	1	1	0	1	1	1	0	0	0	BEN	1	1	AGONISTIC
27_6_17 JERRARD 1 (A)_2.eaf	00:12:24.350000	GE	PUNCH OTHER	1	1	0	0	0	1	0	0	0	JERRARD	1	1	FOOD
27_6_17 JERRARD 1 (A)_2.eaf	00:12:27.405000	GE	TANDEM WALK	1	1	1	1	0	1	0	1	1	ZURI	1	1	FOOD
27_6_17 JERRARD 1 (A)_2.eaf	00:12:29.891000	GE	LOOK	1	1	1	1	1	1	0	1	1	ZURI	1	1	FOOD
27_6_17 JERRARD 1 (A)_2.eaf	00:12:32.378000	GE	AMB TOUCH	1	1	0	1	1	1	0	0	0	JERRARD	1	1	FOOD
27_6_17 JERRARD 1 (A)_2.eaf	00:12:33.080000	GE	LOOK	1	1	1	0	0	1	0	1	1	ZURI	1	1	FOOD
27_6_17 JERRARD 1 (A)_2.eaf	00:18:57.756000	GE	REACH	1	1	0	1	1	1	1	0	1	JERRARD	1	1	FOOD
27_6_17 JERRARD 1 (A)_2.eaf	00:19:01.783000	FE	POUT FACE	1	1	0	1	1	1	1	1	1	JERRARD	1	1	FOOD
27_6_17 JERRARD 1 (A)_2.eaf	00:19:02.269000	GE	PRESENT BODY PART	1	1	1	1	1	1	0	1	1	BEN	1	1	FOOD
27_6_17 JERRARD 1 (A)_2.eaf	00:19:03.026000	GE	BITE	1	1	0	1	1	1	0	1	1	JERRARD	1	1	FOOD
27_6_17 JERRARD 2 (A)_2.eaf	00:02:26.890000	GE	PUSH	1	1	0	1	0	1	0	1	1	JERRARD	1	1	GROOM
27_6_17 JERRARD 2 (A)_2.eaf	00:02:26.971000	FE	PANT HOOT FACE	1	1	0	1	0	1	0	1	1	JERRARD	1	1	GROOM
27_6_17 JERRARD 2 (A)_2.eaf	00:02:42.702000	FE	LIPSMACKING FACE	1	1	1	1	0	0	0	0	0	JAKE	1	0	GROOM
27_6_17 JERRARD 2 (A)_2.eaf	00:09:19.031000	FE	SCREAM FACE	1	1	1	0	0	1	0	1	1	JULIE	0	1	AFFILIATIVE
27_6_17 JERRARD 2 (A)_2.eaf	00:09:19.896000	GE	AMB TOUCH	1	1	0	1	0	1	0	1	1	OLIVER	0	1	AFFILIATIVE
27_6_17 JERRARD 2 (A)_2.eaf	00:09:20.950000	GE	EMBRACE	0	1	1	1	0	1	0	0	0	JULIE	0	1	AFFILIATIVE
27_6_17 JERRARD 2 (A)_2.eaf	00:10:43.874000	FE	SCREAM FACE	1	1	1	1	0	0	0	0	0	ZOE	1	0	AGONISTIC
27_6_17 JERRARD 2 (A)_2.eaf	00:11:02.387000	GE	PRESENT BODY PART	1	1	0	1	1	1	0	1	1	ZOE	1	0	AGONISTIC
27_6_17 JERRARD 2 (A)_2.eaf	00:21:34.296000	GE	AMB TOUCH	1	1	1	1	0	1	0	1	1	JOHARI	1	1	FOOD
27_6_17 JERRARD 2 (A)_2.eaf	00:21:35.634000	GE	LOOK	1	1	0	1	0	1	0	1	1	JOHARI	1	1	FOOD
27_6_17 JERRARD 3 (A)_2.eaf	00:11:26.621000	FE	LIPSMACKING FACE	1	1	1	0	0	1	0	0	0	SHAUN	1	0	GROOM
27_6_17 JERRARD 3 (A)_2.eaf	00:12:20.469000	FE	RASPBERRY FACE	1	1	1	0	0	0	0	0	0	SHAUN	1	0	GROOM
27_6_17 JERRARD 3 (A)_2.eaf	00:17:43.810000	FE	LIPSMACKING FACE	1	1	1	0	0	1	0	0	0	SHAUN	1	0	GROOM
27_6_17 JERRARD 3 (B)_2.eaf	00:03:03.377000	GE	ARM RAISE	0	1	1	1	0	1	0	1	1	GLENN	1	1	GROOM
27_6_17 JERRARD 3 (B)_2.eaf	00:03:10.877000	GE	AMB TOUCH	1	1	0	0	1	1	0	0	0	BEN	1	1	AFFILIATIVE
28_6_17 JAKE (A)_2.eaf	00:16:36.162000	GE	ROLL OVER	1	1	1	1	1	1	0	1	1	GLENN	1	1	PLAY
28_6_17 JAKE (A)_2.eaf	00:19:23.702000	FE	PLAY FACE	1	1	1	1	1	1	0	1	1	KIMA	1	1	PLAY
28_6_17 JAKE (A)_2.eaf	00:19:25.202000	FE	PLAY FACE	1	1	1	1	1	1	0	1	1	JAKE	1	1	PLAY
28_6_17 JAKE (A)_2.eaf	00:19:25.593000	GE	ARM RAISE	1	1	1	1	1	1	0	1	1	JAKE	1	1	PLAY
28_6_17 JAKE (A)_2.eaf	00:19:26.066000	GE	SWING/ROCK	1	1	1	1	1	1	0	1	1	KIMA	1	1	PLAY
28_6_17 JAKE (A)_2.eaf	00:19:44.026000	GE	SWING/ROCK	1	1	1	1	0	0	0	1	1	GLENN	1	1	PLAY
28_6_17 JAKE (A)_2.eaf	00:19:57.976000	FE	PLAY FACE	1	1	1	1	1	1	0	1	1	KIMA	1	1	PLAY
28_6_17 JAKE (A)_2.eaf	00:19:58.084000	GE	AMB TOUCH	1	1	1	1	1	1	0	1	1	KIMA	1	1	PLAY
28_6_17 JAKE (A)_2.eaf	00:20:34.161000	GE	AMB TOUCH	1	1	1	1	1	1	0	1	1	KIMA	1	1	PLAY
28_6_17 JAKE (A)_2.eaf	00:20:35.621000	FE	PLAY FACE	1	1	1	1	0	1	0	1	1	KIMA	1	1	PLAY
28_6_17 JAKE (A)_2.eaf	00:20:37.193000	FE	PLAY FACE	1	1	1	1	0	1	0	1	1	JAKE	1	1	PLAY
28_6_17 JAKE (A)_2.eaf	00:20:45.382000	GE	AMB TOUCH	1	1	1	1	0	1	0	1	1	JAKE	1	1	PLAY
28_6_17 JAKE (A)_2.eaf	00:20:49.923000	FE	PLAY FACE	1	1	1	1	0	1	0	1	1	KIMA	1	1	PLAY
28_6_17 PANDORA 1 (A).eaf	00:04:05.912000	GE	AMB TOUCH	1	1	1	1	0	1	0	1	1	JOHARI	1	1	LOCOMOTION
28_6_17 PANDORA 1 (A).eaf	00:09:16.909000	GE	LOOK	1	1	1	0	0	1	0	1	1	KIMA	0	1	FOOD
28_6_17 PANDORA 1 (A).eaf	00:09:28.674000	GE	LOOK	1	1	1	0	0	1	0	1	1	KIMA	0	1	FOOD
28_6_17 PANDORA 1 (A).eaf	00:10:19.323000	GE	LOOK	1	1	1	0	0	1	0	1	1	SHAUN	0	1	FOOD
28_6_17 PANDORA 1 (A).eaf	00:16:45.162000	FE	LIPSMACKING FACE	1	1	1	0	0	1	0	0	0	JAKE	1	0	GROOM
28_6_17 PANDORA 1 (A).eaf	00:22:04.080000	FE	PANT HOOT FACE	1	1	1	1	0	0	0	0	0	PANDORA	1	0	AROUSAL (GENERAL)
28_6_17 PANDORA 1 (A).eaf	00:22:15.675000	FE	BARED TEETH FACE	1	1	1	1	0	0	0	0	0	GLENN	1	0	AROUSAL (GENERAL)
28_6_17 PANDORA 1 (A).eaf	00:22:16.756000	GE	SWING/ROCK	1	1	1	1	0	0	0	0	0	GLENN	1	0	AROUSAL (GENERAL)
28_6_17 PANDORA 1 (A).eaf	00:22:44.431000	FE	AMBIGUOUS FACE	1	1	1	1	0	1	1	1	1	PANDORA	1	0	AROUSAL (GENERAL)
28_6_17 PANDORA 1 (B).eaf	00:00:46.444000	FE	PANT HOOT FACE	1	1	1	1	0	0	0	0	0	PANDORA	0	0	AROUSAL (GENERAL)
28_6_17 PANDORA 1 (B).eaf	00:03:07.976000	GE	SWING/ROCK	1	1	1	1	1	1	0	1	1	GLENN	1	1	AROUSAL (GENERAL)
28_6_17 PANDORA 1 (B).eaf	00:03:12.382000	GE	SWING/ROCK	1	1	1	1	1	1	0	1	1	GLENN	1	1	AROUSAL (GENERAL)
28_6_17 PANDORA 1 (B).eaf	00:03:18.624000	FE	SCREAM FACE	1	1	1	0	0	1	0	0	0	PANDORA	1	1	AROUSAL (GENERAL)
28_6_17 PANDORA 1 (B).eaf	00:03:50.255000	GE	ARM RAISE	1	1	1	1	1	1	0	1	1	KIMA	1	1	PLAY
28_6_17 PANDORA 1 (B).eaf	00:03:50.417000	FE	PLAY FACE	1	1	1	1	1	1	0	1	1	KIMA	1	1	PLAY
28_6_17 PANDORA 1 (B).eaf	00:03:51.592000	GE	PUSH	1	1	0	1	1	1	0	1	1	BEN	1	1	PLAY
28_6_17 PANDORA 1 (B).eaf	00:03:52.052000	FE	PLAY FACE	1	1	0	1	1	1	0	1	1	BEN	1	1	PLAY
28_6_17 PANDORA 1 (B).eaf	00:03:54.484000	GE	LOOK	0	1	1	0	0	1	0	1	1	BEN	0	1	FOOD
28_6_17 PANDORA 1 (B).eaf	00:04:52.957000	FE	PANT HOOT FACE	1	1	1	1	0	0	0	0	0	PANDORA	1	0	AROUSAL (GENERAL)
28_6_17 PANDORA 1 (B).eaf	00:15:16.147000	GE	SWING/ROCK	1	1	1	0	1	1	0	1	1	UKI	0	1	PLAY
28_6_17 PANDORA 1 (B).eaf	00:15:32.445000	FE	PLAY FACE	1	1	1	0	1	1	0	1	1	KIMA	0	1	PLAY
28_6_17 PANDORA 1 (B).eaf	00:15:32.661000	GE	AMB TOUCH	1	1	1	0	1	1	0	1	1	KIMA	0	1	PLAY
28_6_17 PANDORA 1 (B).eaf	00:22:52.297000	GE	AMB TOUCH	1	1	1	1	1	1	0	1	1	JERRARD	1	1	SEX
28_6_17 PANDORA 1 (B).eaf	00:23:01.946000	GE	PRESENT SEXUAL	0	1	1	1	1	1	0	1	1	PANDORA	1	1	SEX
28_6_17 PANDORA 2 (A).eaf	00:02:11.120000	GE	LOOK	0	1	1	0	1	1	0	1	1	GLENN	0	1	FOOD
28_6_17 PANDORA 2 (A).eaf	00:11:27.998000	GE	LOOK	1	1	1	0	0	1	0	1	1	YOSHI	0	1	FOOD
28_6_17 PANDORA 2 (A).eaf	00:14:18.243000	GE	LOOK	0	1	1	0	1	1	0	1	1	UKI	0	1	FOOD
28_6_17 PANDORA 2 (B).eaf	00:05:48.783000	GE	AMB TOUCH	0	1	1	0	1	1	0	0	0	NAN	1	1	AFFILIATIVE
29_6_17 GRACIE 1 (A)_2.eaf	00:00:05.891000	FE	PANT HOOT FACE	1	1	0	1	1	1	1	1	1	GRACIE	1	1	LOCOMOTION
29_6_17 GRACIE 1 (A)_2.eaf	00:00:06.459000	GE	REACH	0	1	0	1	1	1	0	1	1	GRACIE	1	1	LOCOMOTION
29_6_17 GRACIE 1 (A)_2.eaf	00:00:19.316000	FE	POUT FACE	1	1	0	1	0	1	0	0	0	KIMA	1	1	AFFILIATIVE
29_6_17 GRACIE 1 (A)_2.eaf	00:00:20.208000	GE	EMBRACE	0	1	1	1	0	1	0	0	0	KIMA	1	1	AFFILIATIVE
29_6_17 GRACIE 1 (A)_2.eaf	00:00:54.702000	GE	PRESENT CLIMB ON ME	0	1	0	1	1	1	0	1	1	GRACIE	1	1	LOCOMOTION
29_6_17 GRACIE 1 (A)_2.eaf	00:15:51.821000	GE	PRESENT CLIMB ON ME	1	1	1	1	1	1	0	1	1	GRACIE	1	1	LOCOMOTION
29_6_17 GRACIE 1 (A)_2.eaf	00:17:02.528000	GE	PUSH	1	1	1	1	0	1	0	1	1	JULIE	1	1	LOCOMOTION
29_6_17 GRACIE 1 (A)_2.eaf	00:17:07.728000	GE	AMB TOUCH	1	1	1	1	0	1	0	0	0	SHAUN	1	1	LOCOMOTION
29_6_17 GRACIE 1 (A)_2.eaf	00:17:13.269000	GE	AMB TOUCH	1	1	1	1	0	1	0	1	1	SHAUN	1	1	LOCOMOTION
29_6_17 GRACIE 1 (A)_2.eaf	00:17:16.540000	GE	SWING/ROCK	1	1	0	1	0	1	0	1	1	SHAUN	1	1	LOCOMOTION
29_6_17 GRACIE 1 (A)_2.eaf	00:19:29.844000	FE	PLAY FACE	1	1	1	0	0	1	0	1	1	SHAUN	0	1	PLAY
29_6_17 GRACIE 1 (A)_2.eaf	00:19:30.600000	GE	AMB TOUCH	0	1	0	0	0	1	1	0	1	SHAUN	0	1	PLAY
29_6_17 GRACIE 1 (A)_2.eaf	00:21:07.170000	FE	PANT HOOT FACE	1	1	1	0	0	1	0	1	1	NAN	0	0	AROUSAL (GENERAL)
29_6_17 GRACIE 1 (B)_2.eaf	00:02:37.176000	GE	SWING/ROCK	1	1	1	1	1	1	0	1	1	GLENN	1	1	AFFILIATIVE
29_6_17 GRACIE 1 (B)_2.eaf	00:02:39.636000	GE	AMB TOUCH	1	1	1	1	1	1	0	0	0	GLENN	1	1	AFFILIATIVE
29_6_17 GRACIE 1 (B)_2.eaf	00:02:40.582000	GE	EMBRACE	1	1	0	1	0	1	1	0	1	GLENN	1	1	AFFILIATIVE
29_6_17 GRACIE 1 (B)_2.eaf	00:02:40.744000	FE	BARED TEETH FACE	1	1	1	1	0	1	0	1	1	GRACIE	1	1	AFFILIATIVE
29_6_17 GRACIE 1 (B)_2.eaf	00:02:41.555000	GE	AMB TOUCH	1	1	1	1	1	1	0	1	1	GLENN	1	1	AFFILIATIVE
29_6_17 GRACIE 1 (B)_2.eaf	00:02:43.879000	GE	AMB TOUCH	1	1	0	1	1	1	1	0	1	GRACIE	1	1	AFFILIATIVE
29_6_17 GRACIE 1 (B)_2.eaf	00:02:44.663000	GE	BITE	1	1	0	1	1	1	0	0	0	GLENN	1	1	AFFILIATIVE
29_6_17 GRACIE 1 (B)_2.eaf	00:03:47.430000	GE	AMB TOUCH	0	1	1	1	0	1	0	1	1	GRACIE	1	1	LOCOMOTION
29_6_17 GRACIE 1 (B)_2.eaf	00:15:05.080000	GE	DIRECTED PUSH	0	1	1	1	0	1	0	1	1	GRACIE	1	1	LOCOMOTION
29_6_17 GRACIE 1 (B)_2.eaf	00:16:02.377000	GE	AMB TOUCH	1	1	0	1	0	1	0	0	0	GRACIE	1	1	LOCOMOTION
29_6_17 GRACIE 1 (B)_2.eaf	00:16:04.296000	GE	PRESENT CLIMB ON ME	1	1	0	1	1	1	0	1	1	GRACIE	1	1	LOCOMOTION
29_6_17 GRACIE 1 (B)_2.eaf	00:19:18.405000	GE	PRESENT CLIMB ON ME	1	1	1	1	0	1	0	1	1	GRACIE	1	1	LOCOMOTION
29_6_17 GRACIE 2 (A)_2.eaf	00:06:09.294000	GE	CLAP	1	1	1	1	1	1	1	1	1	ZURI	1	1	PLAY
29_6_17 GRACIE 2 (A)_2.eaf	00:06:09.375000	FE	PLAY FACE	1	1	1	1	1	1	0	1	1	ZURI	1	1	PLAY
29_6_17 GRACIE 2 (A)_2.eaf	00:11:10.079000	GE	EMBRACE	1	1	1	1	1	1	1	1	1	JULIE	1	1	AFFILIATIVE
29_6_17 GRACIE 2 (A)_2.eaf	00:17:59.438000	FE	LIPSMACKING FACE	1	1	1	1	0	1	0	0	0	JAKE	1	1	GROOM
29_6_17 GRACIE 2 (A)_2.eaf	00:18:37.145000	FE	LIPSMACKING FACE	1	1	1	0	0	1	0	0	0	JAKE	1	0	GROOM
29_6_17 GRACIE 2 (A)_2.eaf	00:21:15.676000	GE	AMB TOUCH	1	1	0	1	0	1	0	1	1	JULIE	1	1	LOCOMOTION
29_6_17 GRACIE 2 (A)_2.eaf	00:21:18.082000	GE	AMB TOUCH	1	1	1	1	0	1	0	1	1	JULIE	1	1	LOCOMOTION
29_6_17 GRACIE 2 (A)_2.eaf	00:21:51.339000	GE	EMBRACE	1	1	1	1	0	1	0	0	0	KIMA	1	1	AFFILIATIVE
29_6_17 GRACIE 2 (A)_2.eaf	00:22:00.042000	FE	POUT FACE	0	1	1	1	1	1	0	0	0	KIMA	1	1	AFFILIATIVE
29_6_17 GRACIE 2 (A)_2.eaf	00:22:25.183000	FE	POUT FACE	1	1	1	1	0	1	1	1	1	KIMA	1	1	AFFILIATIVE
29_6_17 JEAN (A)_2.eaf	00:05:52.836000	GE	AMB TOUCH	1	1	0	1	1	1	1	0	1	JOHARI	1	1	PLAY
29_6_17 JEAN (A)_2.eaf	00:05:55.188000	GE	AMB TOUCH	1	1	0	1	1	1	0	0	0	JOHARI	1	1	PLAY
29_6_17 JEAN (A)_2.eaf	00:07:33.296000	GE	AMB TOUCH	1	1	1	1	1	1	0	1	1	YOSHI	1	1	PLAY
29_6_17 JEAN (A)_2.eaf	00:07:35.647000	FE	PANT HOOT FACE	1	1	1	1	1	1	0	1	1	YOSHI	1	1	PLAY
29_6_17 JEAN (A)_2.eaf	00:07:39.377000	GE	BITE	0	1	1	1	0	1	0	0	0	YOSHI	1	1	PLAY
29_6_17 JEAN (A)_2.eaf	00:07:55.323000	GE	BITE	1	1	1	1	0	1	0	1	1	JOHARI	1	1	PLAY
29_6_17 JEAN (A)_2.eaf	00:09:00.648000	GE	DANGLE	1	1	1	1	1	1	0	1	1	JOHARI	1	1	PLAY
29_6_17 JEAN (A)_2.eaf	00:09:02.445000	GE	OBJECT MOVE	1	1	1	0	1	1	1	1	1	YOSHI	1	1	PLAY
29_6_17 JEAN (A)_2.eaf	00:09:08.769000	FE	PLAY FACE	1	1	1	1	1	1	1	1	1	YOSHI	1	1	PLAY
29_6_17 JEAN (A)_2.eaf	00:09:10.377000	FE	PLAY FACE	1	1	1	1	1	1	0	1	1	JOHARI	1	1	PLAY
29_6_17 JEAN (A)_2.eaf	00:09:32.702000	GE	DANGLE	1	1	1	1	1	1	0	1	1	JOHARI	1	1	PLAY
29_6_17 JEAN (A)_2.eaf	00:09:33.729000	FE	PLAY FACE	1	1	1	1	1	1	0	1	1	YOSHI	1	1	PLAY
3_7_17 JULIE (A).eaf	00:10:47.972000	FE	LOWER LIP RELAXER FACE	1	1	1	1	1	1	0	1	1	OLIVER	0	1	FOOD
3_7_17 JULIE (A).eaf	00:10:48.485000	GE	LOOK	1	1	1	1	1	1	0	1	1	OLIVER	0	1	FOOD
3_7_17 JULIE (B).eaf	00:01:43.539000	GE	LOOK	1	1	1	1	1	1	0	1	1	OLIVER	1	1	FOOD
3_7_17 JULIE (B).eaf	00:01:45.025000	GE	HAND FLING	1	1	0	1	1	1	1	0	1	JULIE	1	1	FOOD
3_7_17 OLIVER (A).eaf	00:02:08.839000	GE	OBJECT MOVE	1	1	1	1	1	1	0	1	1	UKI	1	1	PLAY
3_7_17 OLIVER (A).eaf	00:02:09.001000	FE	PLAY FACE	1	1	1	1	1	1	0	0	0	OLIVER	1	1	PLAY
3_7_17 OLIVER (A).eaf	00:02:10.488000	FE	PLAY FACE	1	1	1	1	1	1	0	1	1	UKI	1	1	PLAY
3_7_17 OLIVER (A).eaf	00:02:15.488000	GE	SLAP OTHER	1	1	0	1	1	1	1	0	1	JOHARI	1	1	PLAY
3_7_17 OLIVER (A).eaf	00:02:15.812000	FE	PLAY FACE	1	1	1	0	1	1	0	1	1	JOHARI	1	1	PLAY
3_7_17 OLIVER (A).eaf	00:02:16.785000	FE	PLAY FACE	1	1	1	1	1	1	0	1	1	UKI	1	1	PLAY
3_7_17 OLIVER (A).eaf	00:02:17.109000	GE	AMB TOUCH	1	1	0	1	0	1	0	1	1	UKI	1	1	PLAY
3_7_17 OLIVER (A).eaf	00:02:21.609000	GE	OBJECT MOVE	1	1	0	1	1	1	1	1	1	UKI	1	1	PLAY
3_7_17 OLIVER (A).eaf	00:02:26.798000	GE	PRESENT CLIMB ON ME	1	1	0	1	1	1	0	1	1	UKI	1	1	PLAY
3_7_17 OLIVER (A).eaf	00:02:34.945000	GE	AMB TOUCH	1	1	1	1	1	1	0	1	1	JOHARI	1	1	PLAY
3_7_17 OLIVER (A).eaf	00:02:35.107000	FE	PANT HOOT FACE	1	1	0	1	1	1	0	1	1	UKI	1	1	PLAY
3_7_17 OLIVER (A).eaf	00:02:37.566000	GE	AMB TOUCH	1	1	0	1	1	1	1	0	1	OLIVER	1	1	PLAY
3_7_17 OLIVER (A).eaf	00:02:38.715000	FE	PLAY FACE	1	1	1	1	1	1	0	1	1	JOHARI	1	1	PLAY
3_7_17 OLIVER (A).eaf	00:02:41.107000	GE	HAND FLING	1	1	1	1	1	1	0	0	0	OLIVER	1	1	PLAY
3_7_17 OLIVER (A).eaf	00:02:47.863000	GE	BITE	1	1	0	1	0	1	0	0	0	OLIVER	1	1	PLAY
3_7_17 OLIVER (A).eaf	00:02:50.782000	GE	AMB TOUCH	1	1	0	1	1	1	1	0	1	JOHARI	1	1	PLAY
3_7_17 OLIVER (A).eaf	00:06:26.391000	GE	AMB TOUCH	1	1	1	1	1	1	1	1	1	ZURI	1	1	FOOD
3_7_17 OLIVER (A).eaf	00:06:28.012000	FE	RASPBERRY FACE	0	1	1	1	1	1	0	1	1	ZURI	1	1	FOOD
3_7_17 OLIVER (A).eaf	00:12:30.885000	GE	PRESENT CLIMB ON ME	1	1	1	1	1	1	0	0	0	UKI	1	1	LOCOMOTION
3_7_17 OLIVER (A).eaf	00:14:38.796000	GE	REACH	1	1	0	1	0	1	0	1	1	JULIE	1	1	LOCOMOTION
3_7_17 OLIVER (A).eaf	00:16:26.027000	GE	PRESENT CLIMB ON ME	1	1	1	0	0	1	1	1	1	KIMA	1	1	LOCOMOTION
3_7_17 OLIVER (A).eaf	00:16:29.973000	GE	AMB TOUCH	1	1	0	1	0	1	0	1	1	KIMA	1	1	LOCOMOTION
3_7_17 OLIVER (A).eaf	00:16:30.243000	FE	LOWER LIP RELAXER FACE	1	1	0	1	0	1	0	1	1	KIMA	1	1	LOCOMOTION
3_7_17 OLIVER (A).eaf	00:17:47.810000	GE	TAP/SLAP/KNOCK OBJECT	0	1	0	1	1	1	1	0	1	OLIVER	1	1	PLAY
3_7_17 OLIVER (A).eaf	00:17:51.485000	GE	AMB TOUCH	1	1	1	1	1	1	0	1	1	KIMA	1	1	PLAY
3_7_17 OLIVER (A).eaf	00:19:46.197000	GE	AMB TOUCH	1	1	0	1	1	1	0	0	0	KIMA	1	1	LOCOMOTION
3_7_17 OLIVER (A).eaf	00:19:47.440000	GE	PRESENT CLIMB ON ME	0	1	1	1	1	1	0	1	1	KIMA	1	1	LOCOMOTION
3_7_17 OLIVER (B).eaf	00:00:05.973000	GE	REACH	1	1	0	1	1	1	1	0	1	JULIE	1	1	LOCOMOTION
3_7_17 OLIVER (B).eaf	00:00:12.270000	GE	AMB TOUCH	1	1	0	1	1	1	1	1	1	JULIE	1	1	LOCOMOTION
3_7_17 OLIVER (B).eaf	00:00:19.864000	GE	AMB TOUCH	1	1	0	1	0	1	1	0	1	JULIE	1	1	LOCOMOTION
3_7_17 OLIVER (B).eaf	00:01:07.255000	GE	LOOK	1	1	1	0	0	1	0	1	1	KIMA	1	1	LOCOMOTION
3_7_17 OLIVER (B).eaf	00:01:12.201000	GE	PRESENT CLIMB ON ME	0	1	1	1	1	1	0	1	1	KIMA	1	1	LOCOMOTION
3_7_17 OLIVER (B).eaf	00:01:26.674000	GE	BITE	1	1	0	1	1	1	0	1	1	GLENN	1	1	LOCOMOTION
3_7_17 OLIVER (B).eaf	00:01:44.905000	GE	REACH	1	1	0	1	1	1	0	1	1	JULIE	1	1	AFFILIATIVE
3_7_17 OLIVER (B).eaf	00:01:46.499000	GE	EMBRACE	1	1	1	1	0	1	0	0	0	JULIE	1	1	AFFILIATIVE
3_7_17 OLIVER (B).eaf	00:01:48.553000	GE	SWING/ROCK	1	1	1	0	0	1	0	0	0	JULIE	1	1	AFFILIATIVE
3_7_17 OLIVER (B).eaf	00:02:09.269000	GE	REACH	1	1	1	1	0	1	1	1	1	JULIE	1	1	AFFILIATIVE
3_7_17 OLIVER (B).eaf	00:02:59.282000	GE	AMB TOUCH	1	1	1	1	0	1	0	1	1	KIMA	1	1	LOCOMOTION
3_7_17 OLIVER (B).eaf	00:03:00.092000	GE	PRESENT CLIMB ON ME	0	1	1	1	0	1	0	1	1	KIMA	1	1	LOCOMOTION
3_7_17 OLIVER (B).eaf	00:03:23.417000	GE	ARM RAISE	0	1	0	1	1	1	1	0	1	JULIE	1	1	AFFILIATIVE
3_7_17 OLIVER (B).eaf	00:03:44.174000	FE	PANT HOOT FACE	1	1	0	1	1	1	0	1	1	JULIE	1	1	FOOD
3_7_17 OLIVER (B).eaf	00:03:44.255000	GE	ARM RAISE	1	1	0	1	1	1	0	1	1	JULIE	1	1	FOOD
3_7_17 OLIVER (B).eaf	00:04:03.233000	FE	LOWER LIP RELAXER FACE	1	1	1	0	0	1	0	1	1	OLIVER	0	1	FOOD
3_7_17 OLIVER (B).eaf	00:04:03.233000	GE	LOOK	1	1	1	0	0	1	0	1	1	OLIVER	0	1	FOOD
3_7_17 UKI (A).eaf	00:11:29.783000	GE	DANGLE	1	1	1	1	0	0	1	0	1	UKI	1	1	PLAY
3_7_17 UKI (A).eaf	00:11:31.621000	FE	PLAY FACE	1	1	1	1	0	0	1	0	1	UKI	1	1	PLAY
3_7_17 UKI (A).eaf	00:11:43.756000	GE	LOOK	1	1	1	0	0	1	0	1	1	UKI	1	1	PLAY
3_7_17 YOSHI (A).eaf	00:18:44.328000	FE	LIPSMACKING FACE	1	1	1	1	0	1	0	0	0	UKI	1	0	GROOM
3_7_17 YOSHI (A).eaf	00:19:03.841000	FE	LIPSMACKING FACE	1	1	1	0	0	1	0	0	0	YOSHI	1	0	GROOM
3_7_17 YOSHI (B).eaf	00:00:27.128000	FE	LIPSMACKING FACE	1	1	1	0	1	1	0	0	0	UKI	1	1	GROOM
30_6_17 KIMA 1 (A).eaf	00:03:32.419000	GE	AMB TOUCH	1	1	1	1	1	1	0	1	1	GRACIE	1	1	PLAY
30_6_17 KIMA 1 (A).eaf	00:06:39.870000	FE	POUT FACE	0	1	0	1	1	1	1	1	1	KIMA	1	1	AFFILIATIVE
30_6_17 KIMA 1 (A).eaf	00:06:41.438000	GE	AMB TOUCH	1	1	1	1	1	1	0	1	1	GRACIE	1	1	AFFILIATIVE
30_6_17 KIMA 1 (A).eaf	00:06:53.067000	FE	POUT FACE	1	1	1	0	0	1	1	1	1	KIMA	1	1	AFFILIATIVE
30_6_17 KIMA 1 (A).eaf	00:06:54.878000	GE	REACH	1	1	1	1	0	1	0	1	1	KIMA	1	1	AFFILIATIVE
30_6_17 KIMA 2 (A).eaf	00:01:51.921000	GE	SWING/ROCK	1	1	1	0	0	1	0	1	1	SHAUN	0	1	LOCOMOTION
30_6_17 KIMA 2 (A).eaf	00:06:35.431000	GE	AMB TOUCH	1	1	1	1	0	1	0	1	1	KIMA	1	1	LOCOMOTION
30_6_17 KIMA 2 (A).eaf	00:08:57.488000	GE	AMB TOUCH	1	1	0	1	1	1	1	0	1	JERRARD	1	1	LOCOMOTION
30_6_17 KIMA 2 (A).eaf	00:08:59.407000	GE	PUSH	1	1	0	1	0	1	0	0	0	JERRARD	1	1	LOCOMOTION
30_6_17 KIMA 2 (A).eaf	00:16:53.539000	GE	AMB TOUCH	1	1	0	1	0	1	1	0	1	OLIVER	1	1	AFFILIATIVE
30_6_17 KIMA 2 (A).eaf	00:16:56.026000	GE	TANDEM WALK	1	1	1	1	1	1	0	1	1	OLIVER	1	1	AFFILIATIVE
30_6_17 KIMA 2 (A).eaf	00:16:59.701000	GE	EMBRACE	1	1	1	1	1	1	0	0	0	OLIVER	1	1	AFFILIATIVE
30_6_17 KIMA 2 (A).eaf	00:17:01.944000	GE	SWING/ROCK	1	1	1	0	1	1	0	0	0	JULIE	1	1	AFFILIATIVE
30_6_17 KIMA 3 (A).eaf	00:01:00.404000	FE	AMBIGUOUS FACE	1	1	1	1	1	1	0	1	1	BEN	1	1	AFFILIATIVE
30_6_17 KIMA 3 (A).eaf	00:01:03.242000	GE	SWING/ROCK	1	1	1	1	1	1	0	1	1	BEN	1	1	AFFILIATIVE
30_6_17 KIMA 3 (A).eaf	00:01:06.971000	GE	EMBRACE	1	1	1	1	1	1	0	0	0	BEN	1	1	AFFILIATIVE
30_6_17 KIMA 3 (A).eaf	00:02:54.833000	GE	AMB TOUCH	1	1	1	1	1	1	1	1	1	BEN	1	1	PLAY
30_6_17 KIMA 3 (A).eaf	00:02:55.346000	FE	PLAY FACE	1	1	1	1	1	1	1	1	1	KIMA	1	1	PLAY
30_6_17 KIMA 3 (A).eaf	00:02:58.710000	FE	PLAY FACE	1	1	1	1	1	1	1	1	1	BEN	1	1	PLAY
30_6_17 KIMA 3 (A).eaf	00:03:02.089000	FE	PLAY FACE	1	1	0	1	1	1	0	1	1	KIMA	1	1	PLAY
30_6_17 KIMA 3 (A).eaf	00:03:04.020000	FE	PLAY FACE	1	1	1	1	1	1	0	1	1	JOHARI	1	1	PLAY
30_6_17 KIMA 3 (A).eaf	00:03:12.350000	GE	AMB TOUCH	1	1	1	1	0	1	0	1	1	SHAUN	1	1	PLAY
30_6_17 KIMA 3 (A).eaf	00:03:16.431000	FE	PLAY FACE	1	1	1	1	0	1	0	1	1	SHAUN	1	1	PLAY
30_6_17 KIMA 3 (A).eaf	00:03:28.566000	GE	AMB TOUCH	1	1	1	1	0	1	1	1	1	SHAUN	1	1	PLAY
30_6_17 KIMA 3 (A).eaf	00:03:29.171000	FE	PLAY FACE	1	1	1	1	0	1	1	1	1	SHAUN	1	1	PLAY
30_6_17 KIMA 3 (A).eaf	00:03:54.888000	GE	AMB TOUCH	1	1	1	1	1	1	0	1	1	BEN	1	1	PLAY
30_6_17 KIMA 3 (A).eaf	00:03:57.837000	FE	PLAY FACE	1	1	0	1	1	1	1	1	1	BEN	1	1	PLAY
30_6_17 KIMA 3 (A).eaf	00:03:59.972000	GE	BITE	1	1	1	1	1	1	1	0	1	BEN	1	1	PLAY
30_6_17 NAN (A)_2.eaf	00:00:11.749000	FE	PANT HOOT FACE	1	1	1	1	0	0	0	0	0	PANDORA	1	0	AROUSAL (GENERAL)
30_6_17 NAN (A)_2.eaf	00:10:17.208000	GE	LOOK	0	1	1	0	0	1	0	1	1	OLIVER	0	1	FOOD
30_6_17 NAN (A)_2.eaf	00:10:42.352000	GE	REACH	1	1	0	0	0	1	0	1	1	UKI	0	1	FOOD
30_6_17 NAN (A)_2.eaf	00:10:44.423000	GE	LOOK	1	1	1	0	0	1	0	1	1	UKI	0	1	FOOD
30_6_17 NAN (A)_2.eaf	00:10:44.545000	GE	LOOK	1	1	1	1	0	1	0	1	1	JEAN	0	1	FOOD
30_6_17 NAN (A)_2.eaf	00:10:52.370000	FE	AMBIGUOUS FACE	1	1	0	0	1	1	0	0	0	JEAN	0	1	FOOD
30_8_17 YOSHI (A).eaf	00:12:27.025000	GE	LOOK	1	1	1	1	1	1	0	1	1	KIMA	1	1	FOOD
30_8_17 YOSHI (A).eaf	00:12:29.807000	GE	PUSH	1	1	1	1	1	1	0	1	1	YOSHI	1	1	FOOD
30_8_17 YOSHI (A).eaf	00:13:19.242000	GE	LOOK	1	1	1	0	0	1	0	1	1	KIMA	0	1	FOOD
30_8_17 YOSHI (A).eaf	00:14:54.897000	GE	LOOK	1	1	1	0	0	1	0	1	1	KIMA	0	1	FOOD
30_8_17 YOSHI (A).eaf	00:15:25.135000	GE	LOOK	1	1	1	0	1	1	0	1	1	KIMA	0	1	FOOD
30_8_17 YOSHI (A).eaf	00:23:02.459000	GE	LOOK	1	1	1	0	1	1	0	1	1	YOSHI	0	1	FOOD
30_8_17 ZOE (B).eaf	00:06:25.071000	GE	AMB TOUCH	0	1	1	1	1	1	0	0	0	ZOE	1	1	LOCOMOTION
31_7_17 JULIE (A).eaf	00:04:33.715000	GE	AMB TOUCH	1	1	1	1	1	1	0	1	1	JOHARI	1	1	LOCOMOTION
31_7_17 JULIE (A).eaf	00:04:33.985000	FE	SCREAM FACE	1	1	1	1	0	1	0	0	0	UKI	1	1	LOCOMOTION
31_7_17 JULIE (A).eaf	00:04:35.526000	FE	SCREAM FACE	0	1	1	1	0	0	0	0	0	JOHARI	1	1	LOCOMOTION
31_7_17 JULIE (A).eaf	00:04:37.958000	GE	ARM RAISE	1	1	0	1	1	1	1	0	1	JERRARD	1	1	LOCOMOTION
31_7_17 OLIVER (A).eaf	00:01:06.390000	GE	EMBRACE	1	1	1	1	1	1	0	0	0	OLIVER	0	1	FOOD
31_7_17 OLIVER (A).eaf	00:01:09.309000	GE	LOOK	1	1	1	0	0	1	0	1	1	OLIVER	0	1	FOOD
31_7_17 UKI (A).eaf	00:08:06.323000	FE	PANT HOOT FACE	1	1	1	1	1	1	0	1	1	YOSHI	1	0	AROUSAL (GENERAL)
31_7_17 UKI (A).eaf	00:08:26.107000	FE	PANT HOOT FACE	1	1	1	0	1	1	1	1	1	JULIE	0	1	AFFILIATIVE
31_7_17 UKI (B).eaf	00:04:05.674000	GE	PRESENT CLIMB ON ME	1	1	1	1	1	1	0	1	1	KIMA	1	1	LOCOMOTION
31_7_17 YOSHI (A).eaf	00:08:36.284000	GE	LOOK	1	1	1	1	0	1	0	1	1	ZOE	0	1	FOOD
31_7_17 YOSHI (A).eaf	00:11:51.024000	GE	EMBRACE	1	1	1	1	1	1	0	1	1	GLENN	1	1	AFFILIATIVE
31_7_17 YOSHI (A).eaf	00:11:52.388000	GE	BITE	1	1	0	1	1	1	0	1	1	GLENN	1	1	AFFILIATIVE
31_8_17 ZURI (A).eaf	00:15:47.161000	GE	TANDEM WALK	1	1	1	1	1	1	0	1	1	KIMA	1	1	LOCOMOTION
31_8_17 ZURI (A).eaf	00:21:31.405000	FE	PANT HOOT FACE	1	1	1	1	1	1	1	1	1	PANDORA	1	1	PLAY
31_8_17 ZURI (A).eaf	00:21:33.323000	GE	HAND FLING	0	1	1	1	1	1	1	0	1	PANDORA	1	1	PLAY
31_8_17 ZURI (A).eaf	00:21:33.918000	FE	PLAY FACE	1	1	1	1	1	1	0	1	1	JOHARI	1	1	PLAY
31_8_17 ZURI (A).eaf	00:21:35.837000	GE	HAND FLING	1	1	1	1	1	1	1	1	1	PANDORA	1	1	PLAY
31_8_17 ZURI (A).eaf	00:21:41.297000	GE	HAND FLING	1	1	1	1	1	1	1	1	1	PANDORA	1	1	PLAY
31_8_17 ZURI (A).eaf	00:21:47.459000	GE	HAND FLING	1	1	1	1	1	1	1	1	1	PANDORA	1	1	PLAY
31_8_17 ZURI (A).eaf	00:21:49.270000	GE	REACH	1	1	1	0	1	1	0	1	1	JOHARI	1	1	PLAY
31_8_17 ZURI (A).eaf	00:22:44.350000	GE	THROW OBJECT	1	1	0	1	1	1	1	0	1	JOHARI	1	1	PLAY
31_8_17 ZURI (A).eaf	00:22:49.918000	GE	HAND FLING	1	1	0	0	1	1	1	0	1	PANDORA	1	1	PLAY
31_8_17 ZURI (A).eaf	00:22:53.107000	GE	REACH	1	1	1	1	1	1	0	1	1	PANDORA	1	1	PLAY
31_8_17 ZURI (A).eaf	00:22:55.702000	GE	AMB TOUCH	1	1	0	1	1	1	0	1	1	PANDORA	1	1	PLAY
31_8_17 ZURI (A).eaf	00:22:57.783000	GE	AMB TOUCH	1	1	1	1	0	1	0	1	1	PANDORA	1	1	PLAY
5_21_19 (1).eaf	00:00:11.513000	FE	PANT HOOT FACE	1	1	1	1	0	0	0	0	0	GLENN	1	0	AROUSAL (GENERAL)
5_21_19 (1).eaf	00:00:18.567000	FE	PANT HOOT FACE	1	1	1	1	0	0	0	0	0	NAN	1	0	AROUSAL (GENERAL)
5_21_19 (1).eaf	00:01:21.564000	GE	ARM RAISE	1	1	0	1	1	1	0	1	1	GRACIE	1	1	AFFILIATIVE
5_21_19 (1).eaf	00:01:23.064000	GE	AMB TOUCH	1	1	0	1	1	1	0	0	0	GRACIE	1	1	AFFILIATIVE
5_21_19 (1).eaf	00:01:50.324000	GE	ARM RAISE	1	1	0	1	1	1	0	1	1	GRACIE	1	1	LOCOMOTION
5_21_19 (1).eaf	00:01:51.837000	GE	PUSH	1	1	0	1	1	1	0	1	1	GRACIE	1	1	LOCOMOTION
5_21_19 (10).eaf	00:01:15.593000	GE	LOOK	1	1	1	0	1	1	0	1	1	ZURI	0	1	FOOD
5_21_19 (10).eaf	00:02:14.174000	FE	PANT HOOT FACE	1	1	1	1	1	1	0	1	1	REGINA	1	1	AFFILIATIVE
5_21_19 (10).eaf	00:03:10.887000	GE	AMB TOUCH	1	1	0	1	1	1	0	0	0	JULIE	1	1	LOCOMOTION
5_21_19 (10).eaf	00:03:38.378000	GE	LOOK	1	1	1	0	1	1	0	1	1	OLIVER	0	1	FOOD
5_21_19 (14).eaf	00:03:04.297000	GE	AMB TOUCH	1	1	1	1	1	1	0	1	1	NAN	1	1	LOCOMOTION
5_21_19 (15).eaf	00:01:18.133000	GE	AMB TOUCH	1	1	0	1	1	1	0	0	0	KIMA	1	1	LOCOMOTION
5_21_19 (15).eaf	00:01:19.485000	GE	PRESENT CLIMB ON ME	1	1	1	1	1	1	0	1	1	KIMA	1	1	LOCOMOTION
5_21_19 (15).eaf	00:01:42.309000	GE	AMB TOUCH	1	1	1	1	0	1	1	1	1	KIMA	1	1	LOCOMOTION
5_21_19 (15).eaf	00:01:51.769000	GE	PRESENT CLIMB ON ME	1	1	1	1	1	1	0	1	1	KIMA	1	1	LOCOMOTION
5_21_19 (15).eaf	00:03:07.238000	GE	PRESENT SEXUAL	1	1	1	1	1	1	1	1	1	KIMA	1	1	SEX
5_21_19 (15).eaf	00:03:16.562000	FE	AMBIGUOUS FACE	1	1	1	1	0	1	1	1	1	KIMA	1	1	SEX
5_21_19 (15).eaf	00:03:17.968000	GE	EMBRACE	1	1	1	1	0	1	0	1	1	KIMA	1	1	SEX
5_21_19 (15).eaf	00:03:22.049000	GE	SLAP OTHER	1	1	0	1	0	1	0	1	1	OLIVER	1	1	SEX
5_21_19 (15).eaf	00:03:23.629000	GE	PRESENT SEXUAL	0	1	1	1	1	1	0	0	0	KIMA	1	1	SEX
5_21_19 (15).eaf	00:03:30.295000	FE	PLAY FACE	1	1	1	1	1	1	0	1	1	OLIVER	1	1	PLAY
5_21_19 (15).eaf	00:03:30.375000	GE	AMB TOUCH	1	1	0	1	1	1	1	0	1	YOSHI	1	1	PLAY
5_21_19 (15).eaf	00:03:33.213000	GE	AMB TOUCH	1	1	1	1	1	1	1	1	1	OLIVER	1	1	PLAY
5_21_19 (15).eaf	00:03:35.808000	FE	PLAY FACE	1	1	1	1	1	1	0	1	1	YOSHI	1	1	PLAY
5_21_19 (15).eaf	00:03:36.483000	FE	PLAY FACE	1	1	1	0	0	0	0	1	1	GLENN	1	1	PLAY
5_21_19 (15).eaf	00:03:38.024000	GE	SLAP OTHER	1	1	1	1	1	1	0	1	1	OLIVER	1	1	PLAY
5_21_19 (15).eaf	00:03:45.458000	GE	LOOK	1	1	1	0	1	1	0	1	1	OLIVER	0	1	FOOD
5_21_19 (15).eaf	00:04:11.106000	GE	AMB TOUCH	1	1	1	1	1	1	0	0	0	OLIVER	1	1	AFFILIATIVE
5_21_19 (17).eaf	00:00:46.891000	GE	LOOK	1	1	1	1	0	1	0	1	1	ZURI	0	1	FOOD
5_21_19 (18).eaf	00:00:01.540000	GE	STOMP	0	1	1	0	1	1	1	1	1	UKI	0	1	PLAY
5_21_19 (18).eaf	00:00:11.647000	GE	LOOK	1	1	1	0	1	1	0	1	1	OLIVER	0	1	FOOD
5_21_19 (2).eaf	00:00:28.837000	GE	LOOK	1	1	1	1	0	1	0	1	1	GRACIE	0	1	FOOD
5_21_19 (2).eaf	00:00:29.890000	GE	LOOK	1	1	1	1	0	1	0	1	1	ZURI	0	1	FOOD
5_21_19 (2).eaf	00:01:13.413000	GE	LOOK	1	1	1	1	0	1	0	1	1	JULIE	0	1	FOOD
5_21_19 (3).eaf	00:03:44.687000	GE	AMB TOUCH	1	1	0	1	0	1	1	0	1	SHAUN	1	1	SEX
5_21_19 (5).eaf	00:00:10.621000	GE	LOOK	1	1	1	1	0	1	0	1	1	JULIE	0	1	FOOD
5_21_19 (5).eaf	00:00:13.645000	GE	LOOK	0	1	1	1	0	1	0	1	1	KIMA	0	1	FOOD
5_21_19 (5).eaf	00:00:23.999000	GE	LOOK	1	1	1	0	0	1	0	1	1	KIMA	1	1	FOOD
5_21_19 (6).eaf	00:00:11.931000	GE	LOOK	1	1	1	0	0	1	0	1	1	OLIVER	1	1	FOOD
5_21_19 (8).eaf	00:00:20.188000	GE	REACH	1	1	0	1	1	1	0	0	0	GRACIE	0	1	FOOD
5_21_19 (8).eaf	00:00:21.486000	GE	AMB TOUCH	1	1	1	0	0	1	0	1	1	GRACIE	0	1	FOOD
5_21_19 (8).eaf	00:00:34.594000	GE	AMB TOUCH	1	1	1	1	0	1	0	1	1	GRACIE	1	1	FOOD
5_21_19 (8).eaf	00:00:37.864000	GE	LOOK	1	1	1	1	0	1	0	1	1	GRACIE	1	1	FOOD
5_21_19 (8).eaf	00:02:10.729000	GE	LOOK	1	1	1	0	1	1	1	1	1	GRACIE	1	1	FOOD
5_21_19 (8).eaf	00:03:01.377000	GE	AMB TOUCH	1	1	1	1	1	1	1	1	1	GRACIE	1	1	LOCOMOTION
5_21_19 (9).eaf	00:02:16.985000	GE	PUSH	1	1	1	1	0	1	0	0	0	JOHARI	1	1	LOCOMOTION
5_21_19 (9).eaf	00:04:44.943000	GE	REACH	1	1	0	1	0	1	0	1	1	JOHARI	1	1	LOCOMOTION
5_28_19 (1).eaf	00:00:13.607000	GE	AMB TOUCH	1	1	0	1	1	1	0	0	0	KIMA	1	1	AFFILIATIVE
5_28_19 (1).eaf	00:00:23.187000	FE	AMBIGUOUS FACE	1	1	1	1	1	1	0	1	1	REGINA	1	1	AFFILIATIVE
5_28_19 (1).eaf	00:00:26.781000	FE	AMBIGUOUS FACE	1	1	1	1	1	1	0	1	1	GLENN	1	1	AFFILIATIVE
5_28_19 (1).eaf	00:00:26.795000	GE	JUMP	1	1	1	1	1	1	0	1	1	REGINA	1	1	AFFILIATIVE
5_28_19 (1).eaf	00:00:27.633000	GE	SLAP OTHER	1	1	1	0	0	1	1	1	1	OLIVER	1	1	AFFILIATIVE
5_28_19 (1).eaf	00:00:29.822000	GE	AMB TOUCH	1	1	1	1	1	1	0	0	0	GLENN	1	1	AFFILIATIVE
5_28_19 (1).eaf	00:00:30.322000	GE	BITE	1	1	0	0	0	1	0	0	0	REGINA	1	1	AFFILIATIVE
5_28_19 (1).eaf	00:00:31.227000	GE	PUNCH OTHER	1	1	0	1	0	1	1	0	1	OLIVER	1	1	AFFILIATIVE
5_28_19 (1).eaf	00:00:32.281000	GE	AMB TOUCH	1	1	0	1	1	1	0	0	0	REGINA	1	1	AFFILIATIVE
5_28_19 (1).eaf	00:00:33.240000	GE	AMB TOUCH	1	1	0	1	1	1	1	0	1	OLIVER	1	1	AFFILIATIVE
5_28_19 (3).eaf	00:00:10.351000	GE	AMB TOUCH	1	1	1	1	1	1	0	1	1	KIMA	1	1	LOCOMOTION
5_28_19 (3).eaf	00:00:15.107000	GE	PRESENT CLIMB ON ME	1	1	1	1	1	1	1	1	1	KIMA	1	1	LOCOMOTION
5_28_19 (3).eaf	00:00:15.945000	GE	AMB TOUCH	1	1	1	1	1	1	0	1	1	KIMA	1	1	LOCOMOTION
5_28_19 (3).eaf	00:00:18.810000	GE	PRESENT CLIMB ON ME	1	1	1	0	1	1	0	1	1	KIMA	1	1	LOCOMOTION
5_28_19 (3).eaf	00:00:20.270000	GE	AMB TOUCH	1	1	0	1	1	1	1	1	1	KIMA	1	1	LOCOMOTION
5_28_19 (3).eaf	00:00:33.783000	GE	AMB TOUCH	1	1	1	1	1	1	1	1	1	KIMA	1	1	LOCOMOTION
5_28_19 (4).eaf	00:00:22.972000	GE	PRESENT BODY PART	1	1	1	1	1	1	0	1	1	GLENN	1	1	AGONISTIC
5_28_19 (4).eaf	00:00:26.053000	GE	BITE	1	1	0	1	1	1	0	0	0	GLENN	1	1	AGONISTIC
5_28_19 (4).eaf	00:00:26.161000	FE	BARED TEETH FACE	1	1	1	1	1	0	0	0	0	JULIE	1	1	AGONISTIC
5_28_19 (4).eaf	00:00:27.810000	FE	BARED TEETH FACE	1	1	1	1	1	1	1	1	1	JEAN	1	1	AGONISTIC
5_28_19 (4).eaf	00:00:28.092000	GE	EMBRACE	1	1	1	1	0	1	1	1	1	JULIE	1	1	AGONISTIC
5_28_19 (4).eaf	00:00:31.931000	FE	BARED TEETH FACE	1	1	1	1	1	1	0	1	1	OLIVER	1	1	AGONISTIC
5_28_19 (4).eaf	00:00:34.821000	GE	EMBRACE	1	1	1	1	0	1	0	1	1	JULIE	1	1	AGONISTIC
5_28_19 (4).eaf	00:00:35.416000	GE	HAND FLING	1	1	1	1	1	1	1	1	1	JEAN	1	1	AGONISTIC
5_28_19 (4).eaf	00:00:39.972000	FE	SCREAM FACE	1	1	1	1	0	0	0	0	0	JEAN	1	1	AGONISTIC
5_28_19 (4).eaf	00:00:50.215000	GE	PUSH	0	1	0	1	0	1	1	0	1	GLENN	1	1	AGONISTIC
5_28_19 (4).eaf	00:00:54.377000	GE	PUSH	1	1	0	1	0	1	0	0	0	KIMA	1	1	AGONISTIC
5_28_19 (5).eaf	00:00:07.621000	GE	SWING/ROCK	1	1	1	1	1	1	0	1	1	GLENN	1	1	SEX
5_28_19 (5).eaf	00:00:10.486000	GE	BITE	1	1	1	0	0	1	0	0	0	GLENN	1	1	SEX
5_28_19 (5).eaf	00:00:15.999000	GE	BITE	1	1	0	0	0	1	0	0	0	GLENN	1	1	SEX
5_28_19 (5).eaf	00:00:38.079000	GE	ARM RAISE	1	1	1	1	1	1	0	1	1	OLIVER	1	1	PLAY
5_28_19 (5).eaf	00:00:41.539000	GE	SWING/ROCK	1	1	1	1	1	1	0	1	1	GLENN	1	1	PLAY
5_28_19 (5).eaf	00:00:41.863000	GE	HAND FLING	1	1	0	0	1	1	0	0	0	JEAN	1	1	PLAY
5_28_19 (5).eaf	00:00:43.404000	GE	SLAP OTHER	1	1	1	1	1	1	0	1	1	GLENN	1	1	PLAY
5_28_19 (5).eaf	00:00:43.593000	FE	SCREAM FACE	1	1	1	1	0	1	0	0	0	JEAN	1	1	PLAY
5_28_19 (6).eaf	00:00:32.985000	GE	EMBRACE	1	1	1	1	0	1	0	0	0	JULIE	1	1	FOOD
5_28_19 (6).eaf	00:00:38.012000	GE	AMB TOUCH	1	1	0	1	0	1	1	0	1	JULIE	1	1	FOOD
5_28_19 (6).eaf	00:00:42.594000	GE	LOOK	1	1	0	0	0	1	0	1	1	OLIVER	1	1	FOOD
5_28_19 (6).eaf	00:00:46.594000	GE	AMB TOUCH	1	1	1	1	1	1	1	1	1	JULIE	1	1	FOOD
5_28_19 (6).eaf	00:01:09.188000	GE	EMBRACE	1	1	1	1	0	1	0	0	0	JULIE	1	1	AFFILIATIVE
5_28_19 (6).eaf	00:01:11.107000	GE	SWING/ROCK	1	1	1	0	0	1	0	0	0	JULIE	1	1	AFFILIATIVE
5_28_19 (6).eaf	00:02:01.135000	GE	EMBRACE	1	1	1	1	0	1	0	0	0	JULIE	1	1	AFFILIATIVE
5_28_19 (6).eaf	00:02:03.405000	GE	SWING/ROCK	1	1	1	0	0	1	0	0	0	JULIE	1	1	AFFILIATIVE
5_28_19 (6).eaf	00:02:26.147000	GE	PUSH	1	1	0	1	0	1	0	0	0	JULIE	1	1	LOCOMOTION
6_13_19 (1).eaf	00:02:18.887000	GE	ARM RAISE	1	1	0	1	1	1	1	0	1	YOSHI	1	1	LOCOMOTION
6_13_19 (10).eaf	00:00:03.351000	GE	PUSH	1	1	1	1	0	1	1	1	1	JULIE	1	1	LOCOMOTION
6_13_19 (10).eaf	00:00:05.945000	GE	ARM RAISE	1	1	0	0	1	1	0	0	0	JOHARI	1	1	LOCOMOTION
6_13_19 (10).eaf	00:00:12.459000	GE	PUSH	1	1	1	1	0	1	0	1	1	KIMA	1	1	LOCOMOTION
6_13_19 (10).eaf	00:00:14.621000	FE	PLAY FACE	1	1	1	1	1	1	0	1	1	KIMA	1	1	LOCOMOTION
6_13_19 (10).eaf	00:00:14.675000	GE	AMB TOUCH	1	1	0	1	1	1	0	1	1	KIMA	1	1	LOCOMOTION
6_13_19 (10).eaf	00:00:16.324000	GE	DIRECTED PUSH	0	1	0	1	0	1	0	0	0	JULIE	1	1	LOCOMOTION
6_13_19 (10).eaf	00:00:17.054000	GE	PRESENT CLIMB ON ME	1	1	0	1	1	1	1	1	1	KIMA	1	1	LOCOMOTION
6_13_19 (11).eaf	00:00:02.810000	GE	THROW OBJECT	1	1	1	1	1	1	0	1	1	JOHARI	1	1	PLAY
6_13_19 (11).eaf	00:00:06.594000	GE	PIROUETTE	1	1	1	1	1	1	0	1	1	JOHARI	1	1	PLAY
6_13_19 (11).eaf	00:00:08.891000	GE	AMB TOUCH	1	1	1	1	1	1	0	1	1	OLIVER	1	1	PLAY
6_13_19 (11).eaf	00:00:10.540000	GE	BITE	1	1	0	1	1	1	1	0	1	JOHARI	1	1	PLAY
6_13_19 (11).eaf	00:00:14.864000	GE	PIROUETTE	1	1	0	1	1	1	1	0	1	OLIVER	1	1	PLAY
6_13_19 (11).eaf	00:00:21.188000	GE	AMB TOUCH	1	1	1	1	1	1	0	1	1	OLIVER	1	1	PLAY
6_13_19 (12).eaf	00:00:00.540000	GE	STOMP	1	1	1	1	1	1	0	1	1	JOHARI	1	1	PLAY
6_13_19 (12).eaf	00:00:03.594000	GE	THROW OBJECT	1	1	0	1	1	1	1	0	1	JOHARI	1	1	PLAY
6_13_19 (12).eaf	00:01:25.189000	GE	PRESENT CLIMB ON ME	1	1	1	1	1	1	0	1	1	KIMA	1	1	LOCOMOTION
6_13_19 (2).eaf	00:00:00.297000	FE	PANT HOOT FACE	1	1	1	1	1	1	0	1	1	YOSHI	1	1	AFFILIATIVE
6_13_19 (2).eaf	00:00:07.513000	GE	AMB TOUCH	1	1	1	1	1	1	0	1	1	GLENN	1	1	AFFILIATIVE
6_13_19 (2).eaf	00:00:11.567000	GE	AMB TOUCH	1	1	1	1	1	1	0	1	1	GLENN	1	1	AFFILIATIVE
6_13_19 (20).eaf	00:01:20.202000	FE	PLAY FACE	1	1	1	0	0	1	0	1	1	KIMA	1	1	PLAY
6_13_19 (20).eaf	00:01:29.175000	FE	PLAY FACE	1	1	0	1	1	1	0	1	1	KIMA	1	1	PLAY
6_13_19 (20).eaf	00:01:29.796000	GE	SLAP OTHER	1	1	0	1	1	1	0	1	1	OLIVER	1	1	PLAY
6_13_19 (21).eaf	00:00:03.378000	GE	SWING/ROCK	1	1	0	0	1	1	0	1	1	UKI	1	1	PLAY
6_13_19 (21).eaf	00:00:05.189000	GE	SLAP OTHER	1	1	0	1	1	1	1	0	1	UKI	1	1	PLAY
6_13_19 (22).eaf	00:00:58.486000	GE	DANGLE	1	1	1	0	1	1	1	1	1	UKI	1	1	PLAY
6_13_19 (22).eaf	00:01:34.748000	GE	DANGLE	1	1	1	1	0	1	1	1	1	UKI	1	1	PLAY
6_13_19 (5).eaf	00:00:01.162000	GE	SWING/ROCK	1	1	1	1	1	1	0	1	1	SHAUN	1	1	LOCOMOTION
6_13_19 (5).eaf	00:00:07.351000	GE	AMB TOUCH	1	1	0	1	1	1	0	0	0	JOHARI	1	1	LOCOMOTION
6_13_19 (5).eaf	00:00:10.945000	GE	BITE	0	1	1	1	0	1	0	1	1	SHAUN	1	1	LOCOMOTION
6_13_19 (7).eaf	00:00:03.459000	GE	AMB TOUCH	1	1	0	1	1	1	1	0	1	JULIE	0	1	FOOD
6_13_19 (8).eaf	00:00:08.351000	GE	OBJECT MOVE	1	1	1	1	1	1	1	1	1	KIMA	1	1	PLAY
6_13_19 (8).eaf	00:00:21.134000	FE	PLAY FACE	1	1	1	1	1	1	0	1	1	KIMA	1	1	PLAY
6_13_19 (9).eaf	00:00:03.513000	GE	REACH	1	1	0	1	1	1	0	1	1	ZURI	1	1	FOOD
6_13_19 (9).eaf	00:00:03.675000	FE	AMBIGUOUS FACE	1	1	0	1	1	1	0	1	1	KIMA	1	1	FOOD
6_17_19 (1).eaf	00:00:16.918000	FE	PANT HOOT FACE	1	1	1	1	0	0	0	0	0	NAN	1	0	AROUSAL (GENERAL)
6_17_19 (10).eaf	00:00:01.215000	FE	PANT HOOT FACE	1	1	0	0	1	1	1	0	1	JULIE	1	1	AFFILIATIVE
6_17_19 (10).eaf	00:00:01.783000	GE	ARM RAISE	1	1	1	1	1	1	0	1	1	JULIE	1	1	AFFILIATIVE
6_17_19 (10).eaf	00:00:36.715000	GE	LOOK	1	1	1	0	0	1	0	1	1	JULIE	0	1	FOOD
6_17_19 (11).eaf	00:00:07.188000	GE	AMB TOUCH	1	1	0	1	1	1	0	0	0	GLENN	1	1	SEX
6_17_19 (11).eaf	00:00:12.378000	GE	TANDEM WALK	1	1	1	1	0	1	1	1	1	ZOE	1	1	SEX
6_17_19 (11).eaf	00:00:48.783000	GE	AMB TOUCH	1	1	0	1	1	1	0	0	0	GLENN	1	1	SEX
6_17_19 (11).eaf	00:00:49.850000	GE	BITE	1	1	1	1	1	1	0	1	1	GLENN	1	1	SEX
6_17_19 (2).eaf	00:01:22.782000	GE	LOOK	1	1	1	1	1	1	0	1	1	GLENN	0	1	FOOD
6_17_19 (3).eaf	00:00:06.540000	GE	ARM RAISE	1	1	0	1	1	1	0	1	1	JOHARI	1	1	AFFILIATIVE
6_17_19 (3).eaf	00:00:06.810000	GE	AMB TOUCH	1	1	1	1	1	1	0	1	1	OLIVER	1	1	AFFILIATIVE
6_17_19 (3).eaf	00:00:08.189000	GE	AMB TOUCH	1	1	0	0	1	1	0	1	1	OLIVER	1	1	AFFILIATIVE
6_17_19 (4).eaf	00:00:03.135000	GE	PUSH	1	0	0	1	0	1	0	0	0	JULIE	1	1	LOCOMOTION
6_17_19 (4).eaf	00:00:05.594000	GE	AMB TOUCH	1	1	1	1	0	1	1	1	1	JULIE	1	1	LOCOMOTION
6_17_19 (4).eaf	00:00:08.648000	GE	AMB TOUCH	1	1	0	1	0	1	1	1	1	JULIE	1	1	LOCOMOTION
6_17_19 (4).eaf	00:01:53.039000	GE	DIRECTED PUSH	1	1	1	1	1	1	1	1	1	JULIE	1	1	LOCOMOTION
6_17_19 (4).eaf	00:02:43.999000	GE	AMB TOUCH	1	1	0	1	1	1	1	1	1	JULIE	1	1	LOCOMOTION
6_17_19 (4).eaf	00:02:52.418000	GE	REACH	1	1	0	1	1	1	1	0	1	JULIE	1	1	LOCOMOTION
6_17_19 (4).eaf	00:04:05.771000	GE	BITE	1	1	1	1	1	1	0	0	0	UKI	1	1	PLAY
6_17_19 (4).eaf	00:04:07.774000	FE	PLAY FACE	1	1	1	0	0	0	0	0	0	JOHARI	1	1	PLAY
6_17_19 (4).eaf	00:04:11.423000	GE	AMB TOUCH	1	1	1	1	1	1	1	1	1	OLIVER	1	1	PLAY
6_17_19 (4).eaf	00:04:39.567000	GE	SLAP OTHER	1	1	0	1	0	1	0	0	0	UKI	1	1	PLAY
6_17_19 (4).eaf	00:04:44.107000	GE	PIROUETTE	1	1	1	0	1	1	1	0	1	OLIVER	1	1	PLAY
6_17_19 (4).eaf	00:05:16.728000	GE	ARM RAISE	1	1	0	1	1	1	1	1	1	JOHARI	1	1	LOCOMOTION
6_17_19 (5).eaf	00:00:01.729000	GE	AMB TOUCH	1	1	1	0	0	1	0	0	0	JOHARI	1	1	LOCOMOTION
6_17_19 (5).eaf	00:00:03	GE	AMB TOUCH	1	1	1	0	0	1	1	1	1	JOHARI	1	1	LOCOMOTION
6_17_19 (5).eaf	00:00:09.081000	GE	PUSH	1	1	0	1	0	1	1	0	1	JOHARI	1	1	LOCOMOTION
6_17_19 (5).eaf	00:00:13.459000	GE	TANDEM WALK	1	1	1	0	0	1	1	1	1	JOHARI	1	1	LOCOMOTION
6_17_19 (5).eaf	00:00:21.648000	GE	AMB TOUCH	1	1	0	1	1	1	0	0	0	JOHARI	1	1	LOCOMOTION
6_17_19 (5).eaf	00:00:28.703000	GE	AMB TOUCH	1	1	1	1	1	1	1	1	1	UKI	1	1	PLAY
6_17_19 (5).eaf	00:00:42.527000	GE	HAND FLING	1	1	0	1	1	1	1	0	1	JOHARI	1	1	PLAY
6_17_19 (5).eaf	00:00:50.817000	FE	PLAY FACE	1	1	1	0	1	1	1	1	1	OLIVER	1	1	PLAY
6_17_19 (5).eaf	00:00:54.411000	GE	TAP/SLAP/KNOCK OBJECT	1	1	1	1	1	1	0	1	1	OLIVER	1	1	PLAY
6_17_19 (5).eaf	00:00:56.830000	FE	PLAY FACE	1	1	1	1	1	0	1	1	1	JEAN	1	1	PLAY
6_17_19 (5).eaf	00:00:57.667000	GE	STOMP	1	1	0	1	1	1	0	0	0	OLIVER	1	1	PLAY
6_17_19 (5).eaf	00:00:59.018000	GE	AMB TOUCH	1	1	1	0	1	1	0	0	0	OLIVER	1	1	PLAY
6_17_19 (5).eaf	00:00:59.829000	GE	BITE	1	1	0	1	1	1	0	0	0	OLIVER	1	1	PLAY
6_17_19 (5).eaf	00:01:03.882000	GE	AMB TOUCH	1	1	1	1	1	1	1	0	1	JEAN	1	1	PLAY
6_17_19 (5).eaf	00:01:06.135000	FE	PLAY FACE	1	1	1	1	1	1	0	1	1	UKI	1	1	PLAY
6_17_19 (5).eaf	00:01:06.959000	GE	SWING/ROCK	1	1	1	1	1	1	0	1	1	UKI	1	1	PLAY
6_17_19 (5).eaf	00:01:09.729000	GE	AMB TOUCH	1	1	0	1	1	1	0	0	0	JOHARI	1	1	PLAY
6_17_19 (5).eaf	00:01:39.594000	GE	AMB TOUCH	1	1	0	1	1	1	0	0	0	JEAN	1	1	PLAY
6_17_19 (5).eaf	00:01:40.296000	FE	PLAY FACE	1	1	1	1	1	1	0	1	1	OLIVER	1	1	PLAY
6_17_19 (5).eaf	00:01:40.891000	GE	PUSH	1	1	0	1	1	1	1	0	1	JEAN	1	1	PLAY
6_17_19 (5).eaf	00:01:53.235000	GE	JUMP	1	1	0	1	1	1	1	0	1	UKI	1	1	PLAY
6_17_19 (5).eaf	00:01:54.451000	GE	CLAP	1	1	0	1	1	1	1	0	1	UKI	1	1	PLAY
6_17_19 (5).eaf	00:04:24.725000	GE	PRESENT BODY PART	1	1	1	1	1	1	1	1	1	OLIVER	1	1	PLAY
6_17_19 (5).eaf	00:04:25.387000	GE	BITE	1	1	1	1	1	1	1	1	1	JOHARI	1	1	PLAY
6_17_19 (5).eaf	00:04:26.725000	FE	PLAY FACE	1	1	1	1	1	1	1	1	1	OLIVER	1	1	PLAY
6_17_19 (5).eaf	00:06:10.809000	GE	AMB TOUCH	1	1	1	1	0	1	1	1	1	JULIE	1	1	LOCOMOTION
6_17_19 (5).eaf	00:06:25.161000	GE	AMB TOUCH	1	1	0	1	0	1	1	0	1	JULIE	1	1	LOCOMOTION
6_17_19 (5).eaf	00:06:32.457000	GE	LOOK	1	1	0	1	0	1	0	1	1	OLIVER	1	1	FOOD
6_17_19 (5).eaf	00:06:33.646000	GE	BITE	1	1	0	1	1	1	1	0	1	JOHARI	1	1	FOOD
6_17_19 (7).eaf	00:00:03.053000	GE	EMBRACE	1	1	1	1	0	1	0	0	0	JULIE	1	1	AFFILIATIVE
6_17_19 (7).eaf	00:00:05.269000	GE	SWING/ROCK	1	1	1	0	0	1	0	0	0	JULIE	1	1	AFFILIATIVE
6_17_19 (7).eaf	00:00:16.216000	GE	AMB TOUCH	1	1	1	1	0	1	0	0	0	ZURI	1	0	PLAY
6_17_19 (7).eaf	00:00:16.459000	FE	PLAY FACE	1	1	1	1	0	1	0	0	0	YOSHI	1	0	PLAY
6_17_19 (7).eaf	00:00:17.999000	FE	PLAY FACE	1	1	1	1	0	1	0	0	0	ZURI	1	0	PLAY
6_17_19 (7).eaf	00:02:48.864000	GE	AMB TOUCH	1	1	1	1	0	1	0	0	0	ZURI	1	1	PLAY
6_17_19 (7).eaf	00:02:50.701000	FE	PLAY FACE	1	1	1	1	0	1	0	0	0	YOSHI	1	1	PLAY
6_17_19 (7).eaf	00:02:53.079000	FE	PLAY FACE	1	1	1	1	0	1	0	0	0	ZURI	1	1	PLAY
6_17_19 (7).eaf	00:02:58.080000	GE	PUNCH OTHER	0	1	1	1	1	1	0	1	1	KIMA	1	1	PLAY
6_17_19 (8).eaf	00:01:41.755000	GE	EMBRACE	1	1	1	0	0	1	0	0	0	JULIE	1	1	AROUSAL (GENERAL)
6_17_19 (8).eaf	00:01:43.972000	GE	SWING/ROCK	1	1	1	0	0	1	0	0	0	JULIE	1	1	AROUSAL (GENERAL)
6_18_2018 (1)_2.eaf	00:00:32.730000	GE	DIRECTED PUSH	1	1	1	1	0	1	0	1	1	GRACIE	1	1	LOCOMOTION
6_18_2018 (1)_2.eaf	00:00:52.243000	GE	AMB TOUCH	1	1	0	0	1	1	1	0	1	YOSHI	1	1	AFFILIATIVE
6_18_2018 (1)_2.eaf	00:00:52.708000	FE	AMBIGUOUS FACE	1	1	1	1	1	1	0	1	1	YOSHI	1	1	AFFILIATIVE
6_18_2018 (1)_2.eaf	00:00:53.462000	GE	EMBRACE	0	1	1	1	1	1	0	0	0	JAKE	1	1	AFFILIATIVE
6_18_2018 (1)_2.eaf	00:02:41.432000	FE	PANT HOOT FACE	1	1	1	0	0	0	0	0	0	JEAN	0	0	AROUSAL (GENERAL)
6_18_2018 (1)_2.eaf	00:03:10.737000	FE	PANT HOOT FACE	1	1	0	1	1	1	1	1	1	JEAN	1	0	LOCOMOTION
6_18_2018 (1)_2.eaf	00:03:36.772000	FE	LOWER LIP RELAXER FACE	1	1	1	0	1	1	0	1	1	UKI	1	1	PLAY
6_18_2018 (1)_2.eaf	00:03:37.446000	GE	SLAP OTHER WITH OBJECT	1	1	0	1	1	1	1	0	1	UKI	1	1	PLAY
6_18_2018 (1)_2.eaf	00:03:38.481000	FE	PLAY FACE	1	1	1	1	1	1	0	1	1	UKI	1	1	PLAY
6_18_2018 (1)_2.eaf	00:03:39.134000	FE	AMBIGUOUS FACE	1	1	1	1	1	1	0	1	1	JEAN	1	1	PLAY
6_18_2018 (1)_2.eaf	00:03:39.182000	GE	HAND FLING	1	1	1	1	1	1	1	0	1	JEAN	1	1	PLAY
6_18_2018 (1)_2.eaf	00:03:41.452000	GE	HAND FLING	0	1	0	1	1	1	0	0	0	JEAN	1	1	PLAY
6_18_2018_(11)_2.eaf	00:00:34.169000	FE	PANT HOOT FACE	1	1	1	1	1	1	0	1	1	REGINA	1	1	FOOD
6_18_2018_(11)_2.eaf	00:00:34.635000	FE	AMBIGUOUS FACE	1	1	0	0	1	1	0	0	0	NAN	1	1	FOOD
6_18_2018_(11)_2.eaf	00:00:35.145000	FE	SCREAM FACE	1	1	1	1	1	1	0	1	1	REGINA	1	1	FOOD
6_18_2018_(11)_2.eaf	00:00:40.097000	GE	AMB TOUCH	1	1	0	1	0	1	0	0	0	REGINA	1	1	FOOD
6_18_2018_(11)_2.eaf	00:00:40.243000	FE	PANT HOOT FACE	1	1	0	1	0	1	0	1	1	REGINA	1	1	FOOD
6_18_2018_(11)_2.eaf	00:00:40.536000	GE	AMB TOUCH	0	1	1	1	0	1	1	0	1	REGINA	1	1	FOOD
6_18_2018_(11)_2.eaf	00:00:41.413000	FE	BARED TEETH FACE	1	1	1	1	1	1	0	1	1	NAN	1	1	FOOD
6_18_2018_(11)_2.eaf	00:00:42.834000	GE	PRESENT BODY PART	0	1	1	1	1	1	0	1	1	ZURI	1	1	FOOD
6_18_2018_(13)_2.eaf	00:00:19.511000	GE	LOOK	1	1	1	0	1	1	0	1	1	UKI	0	1	FOOD
6_18_2018_(13)_2.eaf	00:00:32.829000	GE	LOOK	1	1	1	0	1	1	0	1	1	ZURI	0	1	FOOD
6_18_2018_(13)_2.eaf	00:00:36.858000	FE	LOWER LIP RELAXER FACE	0	1	1	0	1	1	1	1	1	ZURI	0	1	FOOD
6_18_2018_(16)_2.eaf	00:02:14.482000	GE	LOOK	1	1	1	0	1	1	0	1	1	YOSHI	0	1	FOOD
6_18_2018_(16)_2.eaf	00:02:18.093000	FE	AMBIGUOUS FACE	0	1	1	0	0	1	0	1	1	YOSHI	0	1	FOOD
6_18_2018_(17)_2.eaf	00:00:25.853000	FE	AMBIGUOUS FACE	0	1	0	1	1	1	1	1	1	GLENN	1	1	GROOM
6_18_2018_(18)_2.eaf	00:12:01.428000	FE	PANT HOOT FACE	1	1	1	1	0	1	0	0	0	BEN	0	1	GROOM
6_18_2018_(18)_2.eaf	00:12:06.237000	FE	RASPBERRY FACE	1	1	1	1	0	1	1	0	1	BEN	0	1	GROOM
6_18_2018_(18)_2.eaf	00:12:13.048000	FE	RASPBERRY FACE	1	1	1	1	1	1	0	0	0	SHAUN	1	0	GROOM
6_18_2018_(18)_2.eaf	00:12:13.486000	FE	LIPSMACKING FACE	1	1	1	0	1	1	0	0	0	JAKE	1	0	GROOM
6_18_2018_(18)_2.eaf	00:13:01.280000	FE	LIPSMACKING FACE	1	1	1	0	0	1	0	0	0	SHAUN	1	0	GROOM
6_18_2018_(18)_2.eaf	00:13:28.120000	FE	RASPBERRY FACE	0	1	1	0	1	1	0	0	0	SHAUN	1	0	GROOM
6_18_2018_(18)_2.eaf	00:13:55.720000	FE	LIPSMACKING FACE	0	1	1	0	0	1	0	0	0	SHAUN	1	0	GROOM
6_18_2018_(18)_2.eaf	00:14:22.960000	FE	LIPSMACKING FACE	1	1	1	0	0	1	0	0	0	SHAUN	1	0	GROOM
6_18_2018_(18)_2.eaf	00:14:45.200000	FE	RASPBERRY FACE	1	1	1	0	0	1	0	0	0	SHAUN	1	0	GROOM
6_18_2018_(18)_2.eaf	00:16:44.640000	GE	AMB TOUCH	1	1	1	1	1	1	0	1	1	KIMA	1	1	PLAY
6_18_2018_(18)_2.eaf	00:16:47.200000	FE	PLAY FACE	1	1	1	1	0	1	0	1	1	KIMA	1	1	PLAY
6_18_2018_(18)_2.eaf	00:16:49.140000	GE	BITE	1	1	1	0	1	1	0	1	1	UKI	1	1	PLAY
6_18_2018_(18)_2.eaf	00:16:57.160000	GE	AMB TOUCH	1	1	1	1	1	1	0	1	1	KIMA	1	1	PLAY
6_18_2018_(18)_2.eaf	00:16:58.400000	FE	PLAY FACE	1	1	1	1	0	1	0	1	1	UKI	1	1	PLAY
6_18_2018_(18)_2.eaf	00:17:01.520000	GE	BITE	1	1	1	0	1	1	0	1	1	KIMA	1	1	PLAY
6_18_2018_(18)_2.eaf	00:17:13.223000	GE	AMB TOUCH	1	1	1	1	1	1	0	1	1	KIMA	1	1	PLAY
6_18_2018_(18)_2.eaf	00:18:20.920000	GE	DIRECTED PUSH	1	1	1	1	0	1	0	1	1	KIMA	1	1	PLAY
6_18_2018_(19)_2.eaf	00:00:04.829000	FE	LOWER LIP RELAXER FACE	0	1	1	1	1	1	0	1	1	BEN	1	1	SEX
6_18_2018_(19)_2.eaf	00:00:27.051000	GE	BITE	1	1	1	1	1	1	0	0	0	BEN	1	1	SEX
6_18_2018_(19)_2.eaf	00:00:53.238000	GE	AMB TOUCH	1	1	1	1	0	1	1	1	1	BEN	1	1	SEX
6_18_2018_(19)_2.eaf	00:00:59.476000	FE	AMBIGUOUS FACE	1	1	0	1	1	1	1	0	1	BEN	1	1	SEX
6_18_2018_(19)_2.eaf	00:01:56.781000	GE	AMB TOUCH	1	1	0	1	1	1	0	0	0	SHAUN	1	1	PLAY
6_18_2018_(19)_2.eaf	00:01:57.609000	GE	BITE	0	1	1	1	1	1	0	0	0	SHAUN	1	1	PLAY
6_18_2018_(19)_2.eaf	00:02:14.815000	GE	AMB TOUCH	1	1	0	1	0	1	0	1	1	UKI	1	1	PLAY
6_18_2018_(19)_2.eaf	00:02:15.181000	FE	PLAY FACE	1	1	0	1	1	1	0	1	1	UKI	1	1	PLAY
6_18_2018_(19)_2.eaf	00:02:30.843000	FE	PLAY FACE	1	1	1	1	1	1	0	1	1	SHAUN	1	1	PLAY
6_18_2018_(19)_2.eaf	00:02:35.185000	FE	PLAY FACE	1	1	0	1	1	1	0	1	1	UKI	1	1	PLAY
6_18_2018_(19)_2.eaf	00:02:35.965000	GE	AMB TOUCH	0	1	0	1	1	1	0	1	1	UKI	1	1	PLAY
6_18_2018_(19)_2.eaf	00:03:06.018000	GE	AMB TOUCH	1	1	0	1	1	1	1	0	1	BEN	1	1	AFFILIATIVE
6_18_2018_(19)_2.eaf	00:03:08.138000	FE	LOWER LIP RELAXER FACE	1	1	0	0	1	1	1	1	1	BEN	1	1	AFFILIATIVE
6_18_2018_(19)_2.eaf	00:03:16.211000	GE	REACH	1	1	1	0	1	1	0	1	1	BEN	1	1	AFFILIATIVE
6_18_2018_(19)_2.eaf	00:03:16.845000	FE	PANT HOOT FACE	0	1	1	1	1	1	0	1	1	BEN	1	1	AFFILIATIVE
6_18_2018_(19)_2.eaf	00:03:22.585000	GE	BITE	0	1	1	1	0	1	1	0	1	BEN	1	1	SEX
6_18_2018_(19)_2.eaf	00:03:26.829000	GE	BITE	1	1	1	1	0	1	1	0	1	BEN	1	1	SEX
6_18_2018_(19)_2.eaf	00:04:25.154000	GE	BITE	1	1	1	1	1	1	1	0	1	BEN	1	1	SEX
6_18_2018_(2)_2.eaf	00:00:23.269000	FE	AMBIGUOUS FACE	0	1	0	1	0	0	1	1	1	ZURI	0	1	FOOD
6_18_2018_(2)_2.eaf	00:00:50.878000	FE	BARED TEETH FACE	1	1	1	0	0	0	0	0	0	REGINA	0	0	REST
6_18_2018_(20)_2.eaf	00:00:41.754000	FE	PANT HOOT FACE	1	1	1	1	1	1	0	1	1	REGINA	1	1	AFFILIATIVE
6_18_2018_(20)_2.eaf	00:00:42.847000	GE	AMB TOUCH	1	1	0	1	1	1	0	0	0	REGINA	1	1	AFFILIATIVE
6_18_2018_(20)_2.eaf	00:00:43.132000	GE	ARM RAISE	1	1	0	1	1	1	0	1	1	GLENN	1	1	AFFILIATIVE
6_18_2018_(20)_2.eaf	00:00:43.615000	GE	BITE	1	1	1	1	1	1	0	0	0	GLENN	1	1	AFFILIATIVE
6_18_2018_(21)_2.eaf	00:01:08.488000	FE	PANT HOOT FACE	1	1	1	1	0	0	0	0	0	BEN	0	0	AGONISTIC
6_18_2018_(21)_2.eaf	00:01:13.877000	GE	TAP/SLAP/KNOCK OBJECT	1	1	0	1	0	0	0	0	0	BEN	0	0	AGONISTIC
6_18_2018_(21)_2.eaf	00:01:26.549000	GE	TAP/SLAP/KNOCK OBJECT	1	1	1	1	0	1	0	1	1	UKI	0	1	AGONISTIC
6_18_2018_(21)_2.eaf	00:01:28.720000	FE	PANT HOOT FACE	1	1	1	0	0	1	0	1	1	UKI	0	1	AGONISTIC
6_18_2018_(21)_2.eaf	00:01:30.305000	GE	JUMP	1	1	0	1	0	1	0	0	0	UKI	0	1	AGONISTIC
6_18_2018_(23)_2.eaf	00:01:43.560000	FE	LIPSMACKING FACE	1	1	1	0	0	1	0	0	0	JAKE	1	1	GROOM
6_18_2018_(23)_2.eaf	00:02:02.072000	FE	LIPSMACKING FACE	0	1	1	0	0	1	0	0	0	JAKE	1	0	GROOM
6_18_2018_(23)_2.eaf	00:04:22.134000	GE	LOOK	1	1	1	0	0	1	0	1	1	ZURI	1	1	FOOD
6_18_2018_(23)_2.eaf	00:04:23.135000	FE	LOWER LIP RELAXER FACE	1	1	1	1	0	1	0	1	1	ZURI	1	1	FOOD
6_18_2018_(24)_2.eaf	00:01:02.276000	GE	AMB TOUCH	0	1	1	1	1	1	0	1	1	KIMA	1	1	FOOD
6_18_2018_(24)_2.eaf	00:01:06.181000	GE	AMB TOUCH	1	0	0	0	0	1	0	0	0	YOSHI	1	1	FOOD
6_18_2018_(24)_2.eaf	00:01:13.239000	GE	LOOK	1	1	1	0	0	1	0	1	1	YOSHI	0	1	FOOD
6_18_2018_(24)_2.eaf	00:03:27.731000	GE	JUMP	1	1	0	1	1	1	0	0	0	UKI	1	1	PLAY
6_18_2018_(24)_2.eaf	00:03:27.878000	FE	PLAY FACE	1	1	1	1	1	1	1	1	1	JEAN	1	1	PLAY
6_18_2018_(24)_2.eaf	00:03:28.953000	GE	ARM RAISE	1	1	0	1	1	1	0	1	1	UKI	1	1	PLAY
6_18_2018_(24)_2.eaf	00:03:30.171000	GE	PUNCH OTHER	1	1	1	1	1	1	1	1	1	JEAN	1	1	PLAY
6_18_2018_(24)_2.eaf	00:03:35.683000	FE	PLAY FACE	1	1	1	1	1	1	0	1	1	JEAN	1	1	PLAY
6_18_2018_(24)_2.eaf	00:03:48.234000	FE	PLAY FACE	1	1	1	1	0	1	0	0	0	JEAN	1	1	PLAY
6_18_2018_(24)_2.eaf	00:06:26.481000	FE	LIPSMACKING FACE	1	1	1	1	1	1	0	0	0	JAKE	1	1	GROOM
6_18_2018_(24)_2.eaf	00:07:17.893000	FE	LIPSMACKING FACE	1	1	1	1	0	1	0	0	0	JAKE	1	0	GROOM
6_18_2018_(24)_2.eaf	00:07:57.976000	FE	LIPSMACKING FACE	1	1	1	0	0	1	0	0	0	JAKE	1	0	GROOM
6_18_2018_(25)_2.eaf	00:00:49.777000	FE	LIPSMACKING FACE	0	1	1	1	1	1	0	0	0	JAKE	1	1	GROOM
6_18_2018_(25)_2.eaf	00:02:24.727000	FE	LIPSMACKING FACE	1	1	1	1	0	1	0	1	1	JAKE	1	1	GROOM
6_18_2018_(27)_2.eaf	00:00:04.536000	GE	CLAP	1	1	1	1	1	0	0	1	1	BEN	1	1	AGONISTIC
6_18_2018_(27)_2.eaf	00:00:06.195000	FE	SCREAM FACE	1	1	1	1	0	0	0	1	1	SHAUN	1	1	AGONISTIC
6_18_2018_(27)_2.eaf	00:00:13.438000	GE	HAND FLING	1	1	1	1	0	1	1	1	1	SHAUN	1	1	AGONISTIC
6_18_2018_(27)_2.eaf	00:00:59.804000	FE	PANT HOOT FACE	1	1	1	1	0	1	0	1	1	BEN	1	1	AGONISTIC
6_18_2018_(27)_2.eaf	00:03:22.756000	FE	PANT HOOT FACE	1	1	1	1	1	0	0	0	0	BEN	1	1	AGONISTIC
6_18_2018_(27)_2.eaf	00:03:27.804000	GE	THROW OBJECT	1	1	0	1	1	0	0	0	0	BEN	1	1	AGONISTIC
6_18_2018_(27)_2.eaf	00:03:29.121000	GE	CLAP	1	1	1	1	1	0	1	1	1	BEN	1	1	AGONISTIC
6_18_2018_(28)_2.eaf	00:00:08.657000	GE	AMB TOUCH	1	1	1	1	1	1	0	1	1	BEN	1	1	AGONISTIC
6_18_2018_(28)_2.eaf	00:00:12.194000	FE	SCREAM FACE	1	1	1	1	0	1	0	1	1	SHAUN	1	1	AGONISTIC
6_18_2018_(28)_2.eaf	00:00:25.172000	GE	SWING/ROCK	1	1	1	0	0	1	0	1	1	JAKE	1	1	AGONISTIC
6_18_2018_(28)_2.eaf	00:00:29.634000	GE	SWING/ROCK	1	1	1	0	0	1	0	1	1	JAKE	1	1	AGONISTIC
6_18_2018_(28)_2.eaf	00:00:30.442000	GE	SWING/ROCK	1	1	0	1	1	1	1	1	1	BEN	1	1	AGONISTIC
6_18_2018_(29)_2.eaf	00:03:05.611000	GE	BITE	0	1	0	1	0	1	0	0	0	BEN	1	1	AFFILIATIVE
6_18_2018_(3)_2.eaf	00:00:12.203000	FE	BARED TEETH FACE	1	1	1	0	0	0	0	0	0	REGINA	0	0	UNSURE/UNKNOWN
6_18_2018_(31)_2.eaf	00:00:17.853000	GE	EMBRACE	1	1	1	1	1	1	0	0	0	UKI	1	1	AFFILIATIVE
6_18_2018_(31)_2.eaf	00:00:19.048000	GE	BITE	0	1	1	1	0	1	0	0	0	JAKE	1	1	AFFILIATIVE
6_18_2018_(32)_2.eaf	00:02:20.023000	GE	CLAP	1	1	0	1	1	1	0	1	1	GRACIE	1	1	GROOM
6_18_2018_(32)_2.eaf	00:02:29.874000	FE	RASPBERRY FACE	1	1	1	0	0	1	0	0	0	SHAUN	1	1	GROOM
6_18_2018_(32)_2.eaf	00:03:23.877000	GE	CLAP	1	1	1	0	1	1	0	1	1	GRACIE	1	1	GROOM
6_18_2018_(32)_2.eaf	00:03:42.487000	FE	RASPBERRY FACE	1	1	1	1	1	1	0	0	0	SHAUN	1	1	GROOM
6_18_2018_(33)_2.eaf	00:01:46.219000	GE	ROLL OVER	1	1	1	0	0	1	0	1	1	KIMA	0	1	GROOM
6_18_2018_(33)_2.eaf	00:01:50.901000	GE	AMB TOUCH	1	1	1	0	0	0	0	1	1	KIMA	0	1	GROOM
6_18_2018_(37)_2.eaf	00:03:12.603000	FE	PANT HOOT FACE	1	1	1	1	1	0	0	0	0	YOSHI	1	0	AROUSAL (GENERAL)
6_18_2018_(37)_2.eaf	00:03:24.964000	FE	AMBIGUOUS FACE	1	1	1	1	1	1	0	1	1	REGINA	1	0	AROUSAL (GENERAL)
6_18_2018_(37)_2.eaf	00:03:25.176000	GE	AMB TOUCH	1	1	0	1	1	1	0	0	0	GLENN	1	0	AROUSAL (GENERAL)
6_18_2018_(37)_2.eaf	00:03:29.568000	FE	PANT HOOT FACE	1	1	1	0	0	0	0	0	0	REGINA	1	0	AROUSAL (GENERAL)
6_18_2018_(37)_2.eaf	00:04:06.327000	FE	PANT HOOT FACE	1	1	1	0	0	1	0	1	1	NAN	0	0	AROUSAL (GENERAL)
6_18_2018_(6)_2.eaf	00:00:15.098000	FE	PLAY FACE	1	1	1	0	0	1	0	1	1	UKI	1	1	PLAY
6_18_2018_(6)_2.eaf	00:00:16.811000	GE	AMB TOUCH	1	1	1	1	0	1	0	1	1	UKI	1	1	PLAY
6_18_2018_(6)_2.eaf	00:00:25.772000	GE	AMB TOUCH	1	1	1	1	1	1	0	1	1	UKI	1	1	PLAY
6_18_2018_(6)_2.eaf	00:00:44.917000	FE	PLAY FACE	1	1	1	0	1	1	0	1	1	UKI	1	1	PLAY
6_18_2018_(6)_2.eaf	00:00:46.265000	GE	AMB TOUCH	1	1	1	1	1	1	0	0	0	UKI	1	1	PLAY
6_18_2018_(6)_2.eaf	00:01:45.623000	GE	AMB TOUCH	1	1	1	1	1	1	0	1	1	ZURI	1	1	PLAY
6_18_2018_(8)_2.eaf	00:02:40.816000	GE	SLAP OTHER	0	1	1	1	1	1	1	0	1	ZURI	1	1	PLAY
6_18_2018_(8)_2.eaf	00:02:40.939000	FE	PLAY FACE	1	1	1	0	1	1	0	1	1	UKI	1	1	PLAY
6_18_2018_(8)_2.eaf	00:02:41.496000	GE	SLAP OTHER	1	1	1	1	1	1	1	0	1	UKI	1	1	PLAY
6_18_2018_(9)_2.eaf	00:00:00.074000	FE	PLAY FACE	1	1	1	0	0	1	1	1	1	UKI	1	1	PLAY
6_19_2018_(11)_2.eaf	00:00:02.512000	FE	PLAY FACE	1	1	1	1	1	1	0	1	1	UKI	1	1	PLAY
6_19_2018_(11)_2.eaf	00:00:04.195000	FE	PLAY FACE	1	1	1	1	1	1	0	1	1	GLENN	1	1	PLAY
6_19_2018_(11)_2.eaf	00:00:05.024000	GE	DANGLE	1	1	1	1	1	1	0	1	1	UKI	1	1	PLAY
6_19_2018_(11)_2.eaf	00:00:05.975000	GE	PUSH	1	1	1	1	1	1	1	1	1	GLENN	1	1	PLAY
6_19_2018_(14)_2.eaf	00:00:35.147000	GE	AMB TOUCH	0	1	1	1	0	1	1	1	1	YOSHI	0	1	LOCOMOTION
6_19_2018_(15)_2.eaf	00:01:12.382000	GE	PIROUETTE	1	1	0	0	1	1	0	0	0	UKI	1	1	PLAY
6_19_2018_(15)_2.eaf	00:01:14.406000	GE	CLAP	1	1	1	1	1	1	0	1	1	UKI	1	1	PLAY
6_19_2018_(15)_2.eaf	00:02:11.475000	GE	CLAP	1	1	1	1	1	1	1	1	1	UKI	1	1	PLAY
6_19_2018_(17)_2.eaf	00:00:07.243000	GE	HAND FLING	0	1	0	1	1	1	0	0	0	JEAN	1	1	PLAY
6_19_2018_(17)_2.eaf	00:00:32.649000	FE	BARED TEETH FACE	1	1	1	0	0	1	0	0	0	REGINA	0	0	UNSURE/UNKNOWN
6_19_2018_(19)_2.eaf	00:01:19.465000	FE	BARED TEETH FACE	1	1	1	0	0	0	0	0	0	REGINA	0	0	REST
6_19_2018_(19)_2.eaf	00:05:32.779000	GE	PRESENT SEXUAL	1	1	1	1	1	1	0	0	0	KIMA	1	1	SEX
6_19_2018_(19)_2.eaf	00:08:28.877000	FE	PANT HOOT FACE	1	1	1	0	0	0	0	0	0	JEAN	0	0	AROUSAL (GENERAL)
6_19_2018_(19)_2.eaf	00:09:13.243000	FE	PANT HOOT FACE	1	1	1	0	0	0	0	0	0	JEAN	0	0	AROUSAL (GENERAL)
6_19_2018_(2)_2.eaf	00:01:49.254000	FE	PLAY FACE	1	1	1	1	1	1	0	1	1	UKI	1	1	PLAY
6_19_2018_(2)_2.eaf	00:01:49.254000	GE	SLAP OTHER	1	1	1	1	1	1	0	1	1	UKI	1	1	PLAY
6_19_2018_(2)_2.eaf	00:02:04.595000	FE	SCREAM FACE	1	1	1	1	1	1	0	1	1	ZURI	1	1	AGONISTIC
6_19_2018_(2)_2.eaf	00:04:02.141000	FE	SCREAM FACE	1	1	1	1	0	0	0	0	0	GRACIE	1	0	AGONISTIC
6_19_2018_(2)_2.eaf	00:04:08.696000	GE	EMBRACE	1	1	0	1	1	1	0	1	1	BEN	1	0	AGONISTIC
6_19_2018_(21)_2.eaf	00:00:05.731000	GE	AMB TOUCH	1	1	1	1	1	1	0	1	1	REGINA	1	1	SEX
6_19_2018_(21)_2.eaf	00:00:07.682000	FE	POUT FACE	1	1	1	1	1	1	1	1	1	SHAUN	1	1	SEX
6_19_2018_(21)_2.eaf	00:00:10.316000	GE	PRESENT SEXUAL	1	1	1	1	1	1	0	1	1	REGINA	1	1	SEX
6_19_2018_(21)_2.eaf	00:00:12.950000	GE	BITE	1	1	1	1	1	1	0	0	0	SHAUN	1	1	SEX
6_19_2018_(21)_2.eaf	00:00:17.389000	GE	PRESENT SEXUAL	1	1	1	1	1	1	0	1	1	REGINA	1	1	SEX
6_19_2018_(21)_2.eaf	00:00:19.828000	GE	BITE	0	1	0	0	0	1	0	0	0	SHAUN	1	1	SEX
6_19_2018_(21)_2.eaf	00:00:25.487000	FE	LOWER LIP RELAXER FACE	1	1	1	1	1	1	0	1	1	SHAUN	1	1	SEX
6_19_2018_(21)_2.eaf	00:00:28.566000	GE	AMB TOUCH	1	1	1	0	0	1	0	1	1	REGINA	1	1	SEX
6_19_2018_(21)_2.eaf	00:00:30.142000	GE	AMB TOUCH	1	1	1	1	1	1	0	0	0	YOSHI	1	1	SEX
6_19_2018_(3)_2.eaf	00:00:02.731000	FE	PANT HOOT FACE	1	1	1	0	0	1	0	0	0	BEN	0	0	AROUSAL (GENERAL)
6_19_2018_(3)_2.eaf	00:00:52.438000	FE	PANT HOOT FACE	1	1	1	0	1	1	0	1	1	ZURI	1	0	AROUSAL (GENERAL)
6_19_2018_(3)_2.eaf	00:00:58.121000	FE	PLAY FACE	1	1	0	1	1	1	0	0	0	ZURI	1	0	AROUSAL (GENERAL)
6_19_2018_(3)_2.eaf	00:00:58.194000	GE	HAND FLING	1	1	0	1	1	1	0	0	0	ZURI	1	0	AROUSAL (GENERAL)
6_19_2018_(3)_2.eaf	00:01:00.804000	GE	AMB TOUCH	1	1	1	1	0	1	0	0	0	JEAN	1	0	AROUSAL (GENERAL)
6_19_2018_(3)_2.eaf	00:01:03.706000	GE	AMB TOUCH	0	1	1	1	0	1	0	1	1	JEAN	1	0	AROUSAL (GENERAL)
6_19_2018_(3)_2.eaf	00:02:10.097000	GE	AMB TOUCH	0	1	1	1	1	1	1	1	1	KIMA	1	1	AFFILIATIVE
6_19_2018_(3)_2.eaf	00:02:32.560000	GE	PUSH	1	1	1	1	0	1	1	0	1	BEN	1	1	LOCOMOTION
6_19_2018_(3)_2.eaf	00:04:37.754000	GE	ARM RAISE	1	1	1	1	1	1	0	1	1	UKI	1	1	AFFILIATIVE
6_19_2018_(3)_2.eaf	00:04:40.608000	GE	EMBRACE	1	1	1	1	1	1	0	1	1	UKI	1	1	AFFILIATIVE
6_19_2018_(3)_2.eaf	00:04:44.071000	GE	EMBRACE	1	1	1	0	1	1	0	0	0	ZURI	1	1	AFFILIATIVE
6_19_2018_(4)_2.eaf	00:00:19.218000	FE	BARED TEETH FACE	1	1	1	0	0	0	0	0	0	REGINA	0	0	REST
6_19_2018_(5)_2.eaf	00:00:28.507000	GE	LOOK	1	1	1	1	1	1	0	1	1	UKI	1	1	FOOD
6_19_2018_(5)_2.eaf	00:00:29.824000	GE	PUNCH OTHER	1	1	1	1	1	1	0	1	1	JAKE	1	1	FOOD
6_19_2018_(5)_2.eaf	00:00:33.531000	GE	LOOK	1	1	1	1	1	1	0	1	1	UKI	1	1	FOOD
6_19_2018_(5)_2.eaf	00:00:38.145000	GE	AMB TOUCH	0	1	0	1	1	1	1	0	1	JAKE	1	1	FOOD
6_19_2018_(5)_2.eaf	00:01:31.243000	GE	SLAP OTHER WITH OBJECT	1	1	1	1	1	1	0	1	1	JEAN	1	1	FOOD
6_19_2018_(5)_2.eaf	00:01:32.023000	FE	SCREAM FACE	1	1	1	1	1	1	0	1	1	JEAN	1	1	FOOD
6_19_2018_(5)_2.eaf	00:01:42.301000	GE	LOOK	0	1	1	0	0	1	0	1	1	UKI	0	1	FOOD
6_19_2018_(8)_2.eaf	00:01:14.805000	GE	LOOK	1	1	1	0	0	1	0	1	1	ZURI	0	1	FOOD
6_19_2018_(8)_2.eaf	00:01:22.036000	FE	AMBIGUOUS FACE	1	1	1	0	0	1	1	1	1	ZURI	0	1	FOOD
6_19_2018_(8)_2.eaf	00:01:37.878000	GE	LOOK	0	1	1	0	0	1	0	1	1	KIMA	1	1	FOOD
6_19_2018_(8)_2.eaf	00:01:46.780000	GE	LOOK	0	1	1	1	0	1	0	1	1	KIMA	1	1	FOOD
6_19_2018_(8)_2.eaf	00:03:27.442000	GE	LOOK	1	1	1	0	0	1	0	1	1	KIMA	0	1	FOOD
6_19_2018_(9)_2.eaf	00:00:18.098000	GE	DANGLE	1	1	1	1	1	1	0	1	1	UKI	1	1	PLAY
6_19_2018_(9)_2.eaf	00:00:18.619000	GE	REACH	1	0	1	1	1	1	0	1	1	JEAN	1	1	PLAY
6_19_2018_(9)_2.eaf	00:00:20.194000	FE	PLAY FACE	1	1	1	1	1	1	0	1	1	JEAN	1	1	PLAY
6_20_19 (1).eaf	00:00:04.116000	GE	LOOK	1	1	1	0	1	1	0	1	1	OLIVER	0	1	FOOD
6_20_19 (11).eaf	00:00:00.729000	FE	PANT HOOT FACE	1	1	1	1	0	0	0	0	0	GLENN	1	0	AROUSAL (GENERAL)
6_20_19 (11).eaf	00:00:02.702000	FE	PANT HOOT FACE	1	1	1	1	0	0	0	0	0	JERRARD	1	0	AROUSAL (GENERAL)
6_20_19 (11).eaf	00:00:03.243000	FE	PANT HOOT FACE	1	1	1	1	0	0	0	0	0	SHAUN	1	0	AROUSAL (GENERAL)
6_20_19 (11).eaf	00:00:08	FE	PANT HOOT FACE	1	1	1	1	0	0	0	0	0	NAN	1	0	AROUSAL (GENERAL)
6_20_19 (11).eaf	00:00:10.621000	FE	PANT HOOT FACE	1	1	0	0	0	1	0	0	0	JERRARD	1	0	AROUSAL (GENERAL)
6_20_19 (11).eaf	00:00:15.702000	FE	AMBIGUOUS FACE	1	1	0	1	1	1	0	1	1	REGINA	1	1	AFFILIATIVE
6_20_19 (11).eaf	00:00:15.830000	GE	AMB TOUCH	1	1	1	1	1	1	1	1	1	GLENN	1	1	AFFILIATIVE
6_20_19 (11).eaf	00:00:17.282000	FE	PANT HOOT FACE	1	1	1	1	1	1	0	1	1	REGINA	1	1	AFFILIATIVE
6_20_19 (11).eaf	00:00:52.971000	FE	LOWER LIP RELAXER FACE	1	1	1	1	1	1	0	1	1	REGINA	1	0	AFFILIATIVE
6_20_19 (11).eaf	00:01:28.360000	GE	SWING/ROCK	1	1	1	0	1	1	0	1	1	GLENN	1	1	GROOM
6_20_19 (11).eaf	00:01:30.048000	GE	AMB TOUCH	1	1	0	1	1	1	1	0	1	GLENN	1	1	GROOM
6_20_19 (11).eaf	00:01:30.467000	FE	PANT HOOT FACE	1	1	1	1	1	1	0	0	0	REGINA	1	1	GROOM
6_20_19 (12).eaf	00:00:03.378000	GE	AMB TOUCH	1	0	1	1	1	1	0	0	0	GRACIE	1	1	LOCOMOTION
6_20_19 (2).eaf	00:00:28.675000	GE	AMB TOUCH	1	1	0	1	1	1	1	0	1	GRACIE	1	1	LOCOMOTION
6_20_19 (2).eaf	00:00:33.134000	GE	AMB TOUCH	1	1	0	1	0	1	0	0	0	GRACIE	1	1	LOCOMOTION
6_20_19 (3).eaf	00:00:08.891000	GE	AMB TOUCH	1	1	1	1	1	1	0	1	1	JULIE	1	1	LOCOMOTION
6_20_19 (3).eaf	00:00:44.944000	GE	LOOK	1	1	1	0	0	1	0	1	1	OLIVER	0	1	FOOD
6_20_19 (3).eaf	00:00:57.269000	GE	LOOK	1	1	1	0	0	1	0	1	1	OLIVER	0	1	FOOD
6_20_19 (3).eaf	00:01:16.098000	GE	LOOK	1	1	1	0	0	1	0	1	1	JULIE	0	1	FOOD
6_20_19 (4).eaf	00:01:21.483000	GE	ROLL OVER	1	1	1	1	1	1	0	1	1	UKI	1	1	PLAY
6_20_19 (5).eaf	00:00:03.459000	FE	PLAY FACE	1	1	1	1	1	1	1	1	1	KIMA	1	1	LOCOMOTION
6_20_19 (5).eaf	00:00:03.567000	GE	SLAP OTHER	1	1	1	1	1	1	1	1	1	KIMA	1	1	LOCOMOTION
6_20_19 (5).eaf	00:00:11.702000	GE	AMB TOUCH	1	1	1	1	1	1	0	0	0	KIMA	1	1	LOCOMOTION
6_20_19 (5).eaf	00:00:12.621000	GE	PRESENT CLIMB ON ME	1	1	1	1	1	1	1	1	1	KIMA	1	1	LOCOMOTION
6_20_19 (5).eaf	00:00:27.215000	GE	PRESENT CLIMB ON ME	1	1	1	1	1	1	1	1	1	KIMA	1	1	LOCOMOTION
6_20_19 (5).eaf	00:00:32.972000	GE	AMB TOUCH	1	1	0	1	0	1	1	0	1	KIMA	1	1	LOCOMOTION
6_20_19 (5).eaf	00:00:37.026000	FE	PLAY FACE	1	1	0	0	0	1	1	0	1	OLIVER	1	1	PLAY
6_20_19 (5).eaf	00:00:37.080000	GE	PUSH	1	1	0	1	0	1	1	0	1	OLIVER	1	1	PLAY
6_20_19 (5).eaf	00:01:10.458000	GE	AMB TOUCH	1	1	0	1	0	1	0	0	0	JULIE	1	1	LOCOMOTION
6_20_19 (6).eaf	00:00:22.566000	GE	AMB TOUCH	1	1	0	1	0	1	0	0	0	JULIE	1	1	AFFILIATIVE
6_20_19 (6).eaf	00:00:30.404000	GE	AMB TOUCH	1	1	1	1	1	1	0	1	1	JULIE	1	1	AFFILIATIVE
6_20_19 (6).eaf	00:00:34.243000	FE	LOWER LIP RELAXER FACE	1	1	1	1	0	1	0	1	1	JULIE	1	1	AFFILIATIVE
6_20_19 (6).eaf	00:00:39.188000	GE	AMB TOUCH	1	0	0	1	1	1	0	0	0	JULIE	1	1	AFFILIATIVE
6_20_19 (6).eaf	00:00:40.972000	GE	EMBRACE	1	1	1	1	0	1	0	0	0	JULIE	1	1	AFFILIATIVE
6_20_19 (6).eaf	00:00:41.918000	GE	SWING/ROCK	1	1	1	0	0	1	0	0	0	JULIE	1	1	AFFILIATIVE
6_20_19 (7).eaf	00:00:03.783000	GE	BITE	1	1	1	1	1	1	0	0	0	SHAUN	1	1	AFFILIATIVE
6_20_19 (8).eaf	00:00:03.783000	GE	SWING/ROCK	1	1	0	1	1	1	0	1	1	GLENN	1	1	LOCOMOTION
6_20_19 (8).eaf	00:00:05.189000	GE	ARM RAISE	1	1	0	1	1	1	0	1	1	GLENN	1	1	LOCOMOTION
6_21_18_GLENN_2.eaf	00:10:13.999000	FE	LIPSMACKING FACE	1	1	1	1	0	1	0	0	0	JAKE	1	0	GROOM
6_21_18_GLENN_2.eaf	00:11:00.666000	FE	LIPSMACKING FACE	1	1	1	0	0	1	0	0	0	JAKE	1	0	GROOM
6_21_18_GRACIE_2.eaf	00:02:47.282000	GE	PUSH	1	1	1	1	1	1	0	1	1	GRACIE	1	1	LOCOMOTION
6_21_18_JAKE_2.eaf	00:01:35.014000	FE	AMBIGUOUS FACE	1	1	1	1	1	1	0	1	1	ZURI	1	0	AROUSAL (GENERAL)
6_21_18_JAKE_2.eaf	00:02:30.893000	FE	POUT FACE	1	1	1	1	0	1	0	1	1	YOSHI	0	0	AROUSAL (GENERAL)
6_21_18_JAKE_2.eaf	00:02:36.802000	GE	ARM RAISE	1	1	0	0	1	1	0	0	0	YOSHI	0	0	AROUSAL (GENERAL)
6_21_18_JAKE_2.eaf	00:02:43.059000	FE	PANT HOOT FACE	1	1	1	1	0	1	1	1	1	GRACIE	1	1	LOCOMOTION
6_21_18_JAKE_2.eaf	00:02:44.156000	GE	SWING/ROCK	1	1	1	1	1	1	0	1	1	GRACIE	1	1	LOCOMOTION
6_21_18_JAKE_2.eaf	00:02:47.881000	GE	JUMP	1	1	0	1	1	1	1	1	1	GRACIE	1	1	LOCOMOTION
6_21_18_JAKE_2.eaf	00:02:51.817000	GE	AMB TOUCH	1	1	1	1	1	1	1	1	1	GRACIE	1	1	LOCOMOTION
6_21_18_JAKE_2.eaf	00:02:54.120000	GE	PUSH	1	1	0	1	0	1	0	1	1	GRACIE	1	1	LOCOMOTION
6_21_18_JAKE_2.eaf	00:04:36.620000	FE	PANT HOOT FACE	1	1	1	1	0	0	0	0	0	SHAUN	1	0	AROUSAL (GENERAL)
6_21_18_JAKE_2.eaf	00:04:45.302000	FE	PANT HOOT FACE	0	1	1	1	0	0	0	0	0	SHAUN	1	0	AROUSAL (GENERAL)
6_21_18_JAKE_2.eaf	00:04:46.484000	FE	PANT HOOT FACE	1	1	1	1	0	0	0	0	0	BEN	1	0	AROUSAL (GENERAL)
6_21_18_SHAUN_2.eaf	00:01:28.023000	GE	BITE	1	1	1	1	1	1	0	1	1	SHAUN	1	1	SEX
6_21_18_SHAUN_2.eaf	00:01:34.648000	GE	AMB TOUCH	1	0	1	1	1	1	0	1	1	SHAUN	1	1	SEX
6_21_18_SHAUN_2.eaf	00:07:29.511000	GE	LOOK	0	1	1	1	0	1	0	1	1	UKI	1	1	AFFILIATIVE
6_21_18_SHAUN_2.eaf	00:07:42.127000	GE	AMB TOUCH	1	1	0	1	1	1	0	1	1	BEN	1	1	AFFILIATIVE
6_21_18_UKI_2.eaf	00:00:11.479000	GE	SLAP OTHER WITH OBJECT	1	1	1	1	0	1	0	1	1	UKI	1	1	PLAY
6_21_18_UKI_2.eaf	00:00:14.162000	FE	PLAY FACE	1	1	1	1	1	1	0	1	1	UKI	1	1	PLAY
6_21_18_UKI_2.eaf	00:00:20.357000	FE	AMBIGUOUS FACE	1	1	1	0	1	1	0	1	1	JEAN	1	1	PLAY
6_21_18_UKI_2.eaf	00:00:27.344000	GE	AMB TOUCH	1	1	1	1	0	1	0	1	1	JEAN	1	1	PLAY
6_21_18_UKI_2.eaf	00:01:06.370000	FE	PLAY FACE	1	1	1	1	1	1	0	1	1	UKI	1	1	PLAY
6_21_18_UKI_2.eaf	00:01:07.138000	FE	AMBIGUOUS FACE	1	1	1	1	1	1	0	1	1	JEAN	1	1	PLAY
6_21_18_UKI_2.eaf	00:01:27.979000	FE	PLAY FACE	1	1	1	1	0	1	0	1	1	JEAN	1	1	PLAY
6_21_18_UKI_2.eaf	00:01:28.014000	GE	AMB TOUCH	1	1	1	1	0	1	0	1	1	JEAN	1	1	PLAY
6_21_18_UKI_2.eaf	00:01:33.710000	FE	PLAY FACE	1	1	1	1	1	1	0	1	1	UKI	1	1	PLAY
6_21_18_UKI_2.eaf	00:01:52.057000	GE	AMB TOUCH	1	1	1	1	0	1	1	1	1	JEAN	1	1	PLAY
6_21_18_UKI_2.eaf	00:01:52.521000	FE	PLAY FACE	1	1	1	1	1	1	0	1	1	JEAN	1	1	PLAY
6_21_18_UKI_2.eaf	00:01:56.305000	FE	PLAY FACE	1	1	1	1	1	1	0	0	0	UKI	1	1	PLAY
6_21_18_UKI_2.eaf	00:04:14.883000	GE	TAP/SLAP/KNOCK OBJECT	1	1	0	0	0	1	1	0	1	UKI	1	1	PLAY
6_21_18_UKI_2.eaf	00:04:19.421000	GE	SLAP OTHER WITH OBJECT	1	1	1	1	0	1	0	1	1	UKI	1	1	PLAY
6_21_18_UKI_2.eaf	00:04:21.805000	FE	AMBIGUOUS FACE	1	1	1	0	1	1	0	1	1	JEAN	1	1	PLAY
6_21_18_UKI_2.eaf	00:04:23.344000	GE	ARM RAISE	1	1	0	1	1	1	1	0	1	JEAN	1	1	PLAY
6_21_18_UKI_2.eaf	00:11:25.468000	GE	ARM RAISE	0	1	1	1	1	1	0	1	1	GRACIE	1	1	LOCOMOTION
6_21_18_ZURI_2.eaf	00:05:16.861000	GE	CLAP	1	1	1	1	1	1	1	1	1	UKI	1	1	PLAY
6_21_18_ZURI_2.eaf	00:05:18.344000	GE	JUMP	1	1	1	0	1	1	1	1	1	UKI	1	1	PLAY
6_21_18_ZURI_2.eaf	00:05:38.551000	GE	THROW OBJECT	1	1	0	1	1	1	0	0	0	UKI	1	1	PLAY
6_21_18_ZURI_2.eaf	00:05:41.896000	GE	CLAP	1	1	0	1	1	1	0	0	0	UKI	1	1	PLAY
6_21_18_ZURI_2.eaf	00:05:42.379000	FE	AMBIGUOUS FACE	1	1	0	1	1	1	1	0	1	ZURI	1	1	PLAY
6_21_18_ZURI_2.eaf	00:05:42.482000	GE	HAND FLING	1	1	0	1	0	1	1	0	1	ZURI	1	1	PLAY
6_22_18_(1)_2.eaf	00:00:44.520000	GE	AMB TOUCH	1	1	1	1	0	1	1	0	1	GRACIE	1	1	LOCOMOTION
6_22_18_(1)_2.eaf	00:00:47.726000	GE	AMB TOUCH	1	1	0	1	0	1	1	0	1	GRACIE	1	1	LOCOMOTION
6_22_18_(11)_2.eaf	00:01:15.950000	FE	PANT HOOT FACE	1	1	1	1	0	0	0	0	0	GRACIE	0	1	AROUSAL (GENERAL)
6_22_18_(11)_2.eaf	00:01:17.718000	FE	PANT HOOT FACE	1	1	1	1	0	0	0	0	0	REGINA	0	1	AROUSAL (GENERAL)
6_22_18_(11)_2.eaf	00:01:18.559000	FE	PANT HOOT FACE	1	1	1	1	0	0	0	0	0	YOSHI	0	1	AROUSAL (GENERAL)
6_22_18_(11)_2.eaf	00:02:02.455000	GE	SLAP OTHER WITH OBJECT	1	1	0	1	1	1	0	0	0	UKI	1	1	PLAY
6_22_18_(11)_2.eaf	00:02:03.171000	FE	PANT HOOT FACE	1	1	0	1	0	1	0	1	1	NAN	1	1	PLAY
6_22_18_(11)_2.eaf	00:02:03.283000	GE	REACH	1	1	0	1	0	1	0	0	0	NAN	1	1	PLAY
6_22_18_(12)_2.eaf	00:01:43.746000	FE	AMBIGUOUS FACE	1	1	0	1	1	1	1	1	1	BEN	1	1	AFFILIATIVE
6_22_18_(12)_2.eaf	00:01:44.721000	GE	AMB TOUCH	0	1	0	1	1	1	0	1	1	BEN	1	1	AFFILIATIVE
6_22_18_(12)_2.eaf	00:01:48.941000	FE	PANT HOOT FACE	1	1	1	1	1	1	0	1	1	NAN	1	1	FOOD
6_22_18_(12)_2.eaf	00:01:51.892000	GE	LOOK	0	1	1	1	0	1	0	1	1	UKI	1	1	FOOD
6_22_18_(12)_2.eaf	00:02:02.409000	GE	LOOK	0	1	1	0	1	1	0	1	1	ZURI	1	1	FOOD
6_22_18_(12)_2.eaf	00:02:02.762000	GE	LOOK	0	1	1	0	1	1	0	1	1	GRACIE	1	1	FOOD
6_22_18_(12)_2.eaf	00:02:12.417000	GE	AMB TOUCH	1	1	0	1	1	1	0	1	1	NAN	1	1	FOOD
6_22_18_(12)_2.eaf	00:02:12.841000	FE	PANT HOOT FACE	1	1	0	1	1	0	0	1	1	NAN	1	1	FOOD
6_22_18_(12)_2.eaf	00:02:13.758000	FE	POUT FACE	1	1	0	1	1	1	0	1	1	UKI	1	1	FOOD
6_22_18_(12)_2.eaf	00:02:57.172000	GE	PUSH	0	1	0	1	1	1	0	0	0	BEN	1	1	FOOD
6_22_18_(12)_2.eaf	00:04:06.534000	GE	AMB TOUCH	0	1	0	1	1	1	0	0	0	JEAN	1	1	FOOD
6_22_18_(12)_2.eaf	00:04:07.556000	GE	AMB TOUCH	0	1	0	1	1	1	0	0	0	NAN	1	1	FOOD
6_22_18_(13)_2.eaf	00:00:40.754000	FE	LIPSMACKING FACE	1	1	1	0	1	1	0	0	0	JAKE	1	0	GROOM
6_22_18_(13)_2.eaf	00:01:02.243000	FE	LIPSMACKING FACE	1	1	1	0	0	1	0	0	0	JAKE	1	0	GROOM
6_22_18_(13)_2.eaf	00:01:09.767000	FE	RASPBERRY FACE	1	1	1	1	1	1	0	0	0	BEN	1	1	GROOM
6_22_18_(13)_2.eaf	00:01:52.987000	GE	SLAP OTHER WITH OBJECT	1	1	1	1	1	0	0	1	1	UKI	1	1	PLAY
6_22_18_(13)_2.eaf	00:01:56.279000	FE	AMBIGUOUS FACE	1	1	1	1	1	1	0	1	1	JEAN	1	1	PLAY
6_22_18_(13)_2.eaf	00:01:56.279000	GE	REACH	1	1	1	1	1	1	0	1	1	JEAN	1	1	PLAY
6_22_18_(13)_2.eaf	00:02:15.901000	GE	SLAP OTHER	1	1	1	1	1	1	1	1	1	JEAN	1	1	PLAY
6_22_18_(13)_2.eaf	00:02:15.950000	FE	PLAY FACE	1	1	1	1	1	1	0	1	1	JEAN	1	1	PLAY
6_22_18_(13)_2.eaf	00:02:17.132000	FE	SCREAM FACE	1	1	1	1	1	1	0	0	0	UKI	1	1	PLAY
6_22_18_(13)_2.eaf	00:02:39.010000	GE	AMB TOUCH	1	1	1	1	0	1	1	1	1	JEAN	1	1	PLAY
6_22_18_(13)_2.eaf	00:02:50.211000	FE	PLAY FACE	1	1	1	1	0	1	1	1	1	JEAN	1	1	PLAY
6_22_18_(13)_2.eaf	00:02:50.901000	FE	PLAY FACE	1	1	0	1	1	1	0	1	1	UKI	1	1	PLAY
6_22_18_(13)_2.eaf	00:04:43.317000	GE	ROLL OVER	1	1	1	1	1	1	0	1	1	UKI	1	1	PLAY
6_22_18_(13)_2.eaf	00:04:44.217000	FE	PLAY FACE	1	1	1	1	1	1	1	1	1	UKI	1	1	PLAY
6_22_18_(13)_2.eaf	00:05:57.651000	FE	PANT HOOT FACE	1	1	1	1	0	0	0	0	0	NAN	1	0	AROUSAL (GENERAL)
6_22_18_(13)_2.eaf	00:06:08.423000	FE	PANT HOOT FACE	1	1	1	0	0	0	0	0	0	ZURI	1	0	AROUSAL (GENERAL)
6_22_18_(13)_2.eaf	00:08:02.629000	GE	TAP/SLAP/KNOCK OBJECT	1	1	1	1	1	1	0	1	1	UKI	1	1	PLAY
6_22_18_(13)_2.eaf	00:08:10.478000	GE	SLAP OTHER WITH OBJECT	0	1	1	1	1	1	1	1	1	UKI	1	1	PLAY
6_22_18_(13)_2.eaf	00:08:14.880000	GE	HAND FLING	1	1	1	1	1	1	1	0	1	NAN	1	1	PLAY
6_22_18_(13)_2.eaf	00:08:17.785000	FE	PLAY FACE	1	1	1	1	1	1	1	1	1	UKI	1	1	PLAY
6_22_18_(13)_2.eaf	00:08:18.088000	GE	SLAP OTHER WITH OBJECT	1	1	1	1	1	1	0	1	1	UKI	1	1	PLAY
6_22_18_(13)_2.eaf	00:08:19.512000	GE	HAND FLING	1	1	1	1	1	1	0	1	1	NAN	1	1	PLAY
6_22_18_(13)_2.eaf	00:08:37.266000	FE	PLAY FACE	1	1	1	1	1	1	1	1	1	UKI	1	1	PLAY
6_22_18_(13)_2.eaf	00:08:37.277000	GE	SLAP OTHER WITH OBJECT	1	1	1	1	1	1	1	1	1	UKI	1	1	PLAY
6_22_18_(13)_2.eaf	00:08:39.762000	GE	HAND FLING	1	1	1	0	1	1	1	1	1	NAN	1	1	PLAY
6_22_18_(13)_2.eaf	00:08:41.497000	FE	AMBIGUOUS FACE	1	1	0	1	1	1	1	1	1	NAN	1	1	PLAY
6_22_18_(14)_2.eaf	00:00:00.219000	GE	PIROUETTE	1	1	0	0	1	1	1	0	1	UKI	1	1	PLAY
6_22_18_(14)_2.eaf	00:00:05.195000	GE	SLAP OTHER WITH OBJECT	1	1	1	1	1	1	1	1	1	UKI	1	1	PLAY
6_22_18_(14)_2.eaf	00:00:09.268000	FE	PLAY FACE	1	1	1	1	1	1	0	1	1	UKI	1	1	PLAY
6_22_18_(14)_2.eaf	00:00:30.316000	GE	SLAP OTHER WITH OBJECT	1	1	0	1	1	1	1	0	1	NAN	1	1	PLAY
6_22_18_(14)_2.eaf	00:00:30.633000	FE	PANT HOOT FACE	1	1	0	1	1	1	1	1	1	NAN	1	1	PLAY
6_22_18_(14)_2.eaf	00:00:32.633000	FE	AMBIGUOUS FACE	1	1	1	0	0	1	0	1	1	ZURI	1	1	PLAY
6_22_18_(14)_2.eaf	00:00:36.170000	FE	BARED TEETH FACE	1	1	1	1	1	1	0	1	1	UKI	1	1	PLAY
6_22_18_(14)_2.eaf	00:00:36.999000	FE	LOWER LIP RELAXER FACE	1	1	1	1	1	1	0	1	1	ZURI	1	1	PLAY
6_22_18_(14)_2.eaf	00:00:37.194000	GE	AMB TOUCH	1	1	1	1	1	1	0	1	1	ZURI	1	1	PLAY
6_22_18_(17)_2.eaf	00:00:40.967000	GE	SLAP OTHER	1	1	1	1	1	1	1	0	1	UKI	1	1	AGONISTIC
6_22_18_(17)_2.eaf	00:00:41.385000	FE	SCREAM FACE	1	1	1	1	1	1	1	1	1	UKI	1	1	AGONISTIC
6_22_18_(17)_2.eaf	00:00:41.920000	FE	SCREAM FACE	1	1	0	1	1	1	0	1	1	ZURI	1	1	AGONISTIC
6_22_18_(17)_2.eaf	00:00:44.912000	FE	POUT FACE	0	1	1	0	1	1	0	1	1	UKI	1	1	AGONISTIC
6_22_18_(19)_2.eaf	00:00:03.048000	GE	LOOK	0	1	1	0	0	1	0	1	1	UKI	0	1	FOOD
6_22_18_(19)_2.eaf	00:00:18.024000	GE	LOOK	0	1	1	0	0	1	0	1	1	UKI	0	1	FOOD
6_22_18_(25)_2.eaf	00:00:40.877000	FE	BARED TEETH FACE	1	1	1	1	0	0	0	0	0	REGINA	1	0	REST
6_22_18_(27)_2.eaf	00:00:30.803000	FE	POUT FACE	1	1	1	1	1	1	1	1	1	KIMA	1	1	FOOD
6_22_18_(3)_2.eaf	00:00:23.800000	GE	AMB TOUCH	1	1	1	1	0	1	1	1	1	GRACIE	1	1	LOCOMOTION
6_22_18_(3)_2.eaf	00:00:30.713000	GE	AMB TOUCH	1	1	0	1	0	1	0	0	0	GRACIE	1	1	LOCOMOTION
6_22_18_(7)_2.eaf	00:00:38.958000	FE	LOWER LIP RELAXER FACE	1	1	1	0	1	1	0	1	1	UKI	0	1	PLAY
6_22_18_(7)_2.eaf	00:00:39.799000	GE	TAP/SLAP/KNOCK OBJECT	0	1	1	1	1	1	0	1	1	UKI	0	1	PLAY
6_22_18_(7)_2.eaf	00:02:43.597000	FE	AMBIGUOUS FACE	1	1	1	1	1	1	1	1	1	UKI	1	1	PLAY
6_22_18_(7)_2.eaf	00:02:43.597000	GE	TAP/SLAP/KNOCK OBJECT	1	1	1	1	1	1	1	1	1	UKI	1	1	PLAY
6_22_18_(8)_2.eaf	00:00:10.999000	GE	AMB TOUCH	1	1	1	1	1	1	0	1	1	YOSHI	1	1	GROOM
6_22_18_(9)_2.eaf	00:00:00.024000	FE	PANT HOOT FACE	1	1	1	0	0	0	0	0	0	JEAN	0	0	AROUSAL (GENERAL)
6_22_18_(9)_2.eaf	00:00:05.170000	GE	TAP/SLAP/KNOCK OBJECT	0	1	1	0	0	0	0	0	0	JEAN	0	0	AROUSAL (GENERAL)
6_22_18_(9)_2.eaf	00:00:07.219000	GE	ARM RAISE	1	1	0	1	1	1	1	0	1	KIMA	1	1	PLAY
6_22_18_(9)_2.eaf	00:00:08.170000	FE	PLAY FACE	1	1	0	1	1	1	0	1	1	JEAN	1	1	PLAY
6_22_18_(9)_2.eaf	00:00:57.016000	GE	AMB TOUCH	1	1	1	1	1	1	0	0	0	UKI	1	1	PLAY
6_22_18_(9)_2.eaf	00:00:57.626000	FE	PLAY FACE	1	1	1	1	1	1	0	1	1	UKI	1	1	PLAY
6_22_18_(9)_2.eaf	00:00:58.919000	FE	PLAY FACE	1	1	1	1	1	1	0	1	1	KIMA	1	1	PLAY
6_22_18_(9)_2.eaf	00:00:58.955000	GE	ROLL OVER	1	1	1	1	1	1	0	1	1	UKI	1	1	PLAY
6_25_18_(1)_2.eaf	00:00:59.332000	GE	SWING/ROCK	1	1	1	1	1	1	0	1	1	UKI	1	1	PLAY
6_25_18_(1)_2.eaf	00:01:05.282000	GE	AMB TOUCH	0	1	1	1	1	1	0	0	0	JAKE	1	1	PLAY
6_25_18_(1)_2.eaf	00:05:18.062000	FE	BARED TEETH FACE	0	1	1	1	0	0	0	0	0	REGINA	0	0	REST
6_25_18_(10)_2.eaf	00:00:01.365000	GE	ARM RAISE	0	1	0	1	1	1	1	1	1	GRACIE	1	1	REST
6_25_18_(11)_2.eaf	00:00:26	GE	SLAP OTHER WITH OBJECT	1	1	1	1	1	1	0	1	1	UKI	1	1	PLAY
6_25_18_(11)_2.eaf	00:00:26.780000	FE	AMBIGUOUS FACE	1	1	1	0	1	1	0	1	1	JEAN	1	1	PLAY
6_25_18_(11)_2.eaf	00:00:30.779000	GE	AMB TOUCH	1	1	1	1	1	1	0	0	0	JEAN	1	1	PLAY
6_25_18_(12)_2.eaf	00:01:11.413000	GE	SLAP OTHER WITH OBJECT	1	1	1	1	1	1	1	1	1	UKI	1	1	PLAY
6_25_18_(12)_2.eaf	00:01:11.974000	FE	PLAY FACE	1	1	1	1	1	1	1	1	1	UKI	1	1	PLAY
6_25_18_(14)_2.eaf	00:00:34.511000	FE	LIPSMACKING FACE	1	1	1	0	0	1	0	0	0	JAKE	1	0	GROOM
6_25_18_(15)_2.eaf	00:00:33.268000	FE	LOWER LIP RELAXER FACE	1	1	1	1	1	1	0	1	1	JAKE	1	0	GROOM
6_25_18_(15)_2.eaf	00:00:36.926000	FE	LIPSMACKING FACE	1	1	1	0	0	1	0	0	0	JAKE	1	0	GROOM
6_25_18_(18)_2.eaf	00:01:19.951000	GE	AMB TOUCH	0	1	1	1	1	1	0	0	0	JAKE	1	1	GROOM
6_25_18_(18)_2.eaf	00:01:27.609000	GE	AMB TOUCH	0	1	0	1	1	1	0	0	0	JAKE	1	1	GROOM
6_25_18_(20)_2.eaf	00:00:00	FE	LIPSMACKING FACE	1	1	1	0	0	0	0	0	0	JAKE	0	0	GROOM
6_25_18_(22)_2.eaf	00:00:00.853000	GE	PUNCH OTHER	0	1	0	1	1	1	1	0	1	REGINA	1	1	FOOD
6_25_18_(25)_2.eaf	00:00:29.535000	GE	SLAP OTHER WITH OBJECT	1	1	1	0	0	1	1	1	1	UKI	0	1	PLAY
6_25_18_(25)_2.eaf	00:00:30.291000	FE	PLAY FACE	1	1	1	0	0	1	0	1	1	UKI	0	1	PLAY
6_25_18_(25)_2.eaf	00:00:38.353000	GE	PUSH	0	1	1	1	0	1	0	1	1	UKI	0	1	PLAY
6_25_18_(25)_2.eaf	00:00:45.991000	GE	AMB TOUCH	0	1	0	1	1	1	0	0	0	GLENN	0	1	PLAY
6_25_18_(25)_2.eaf	00:00:48.370000	GE	PUSH	1	1	1	1	0	1	0	1	1	UKI	0	1	PLAY
6_25_18_(27)_2.eaf	00:00:46.169000	FE	PLAY FACE	1	1	1	1	1	1	0	1	1	GLENN	1	1	PLAY
6_25_18_(27)_2.eaf	00:00:59.560000	GE	SLAP OTHER	1	1	1	1	1	1	0	1	1	UKI	1	1	PLAY
6_25_18_(27)_2.eaf	00:00:59.779000	FE	PLAY FACE	1	1	1	1	1	1	0	1	1	UKI	1	1	PLAY
6_25_18_(27)_2.eaf	00:01:03.340000	GE	AMB TOUCH	1	1	1	1	1	1	0	1	1	UKI	1	1	PLAY
6_25_18_(29)_2.eaf	00:01:16.072000	FE	AMBIGUOUS FACE	1	1	1	1	1	1	1	1	1	GLENN	1	1	AFFILIATIVE
6_25_18_(29)_2.eaf	00:01:17.009000	FE	AMBIGUOUS FACE	1	1	1	1	1	1	0	1	1	REGINA	1	1	AFFILIATIVE
6_25_18_(29)_2.eaf	00:01:19.853000	GE	AMB TOUCH	1	1	1	1	1	1	0	0	0	GLENN	1	1	AFFILIATIVE
6_25_18_(29)_2.eaf	00:01:20.950000	GE	BITE	0	1	1	0	0	1	0	0	0	REGINA	1	1	AFFILIATIVE
6_25_18_(3)_2.eaf	00:02:38.894000	FE	LOWER LIP RELAXER FACE	1	1	1	0	0	1	0	1	1	UKI	1	1	PLAY
6_25_18_(3)_2.eaf	00:02:43.559000	GE	PUSH	1	1	1	0	0	1	1	1	1	UKI	1	1	PLAY
6_25_18_(3)_2.eaf	00:02:56.799000	GE	ROLL OVER	0	1	0	1	0	1	0	0	0	UKI	1	1	PLAY
6_25_18_(3)_2.eaf	00:02:58.279000	FE	PLAY FACE	1	1	0	1	0	1	0	0	0	REGINA	1	1	PLAY
6_25_18_(31)_2.eaf	00:00:09.455000	FE	LOWER LIP RELAXER FACE	1	1	1	1	1	1	1	1	1	GLENN	1	1	SEX
6_25_18_(31)_2.eaf	00:00:12.365000	GE	SWING/ROCK	0	1	0	1	1	1	0	0	0	GLENN	1	1	SEX
6_25_18_(31)_2.eaf	00:00:22.705000	GE	HAND FLING	0	1	1	1	1	1	1	1	1	YOSHI	1	1	PLAY
6_25_18_(31)_2.eaf	00:00:24.803000	FE	AMBIGUOUS FACE	1	1	1	1	1	0	1	1	1	KIMA	1	1	PLAY
6_25_18_(31)_2.eaf	00:00:26.852000	GE	HAND FLING	1	1	0	1	1	1	0	1	1	YOSHI	1	1	PLAY
6_25_18_(31)_2.eaf	00:00:28.193000	GE	THROW OBJECT	1	1	0	1	1	0	1	0	1	KIMA	1	1	PLAY
6_25_18_(31)_2.eaf	00:00:29.413000	GE	SWING/ROCK	1	1	0	1	1	1	1	0	1	GLENN	1	1	PLAY
6_25_18_(31)_2.eaf	00:01:43.779000	GE	THROW OBJECT	0	1	0	1	1	1	1	0	1	KIMA	1	1	PLAY
6_25_18_(32)_2.eaf	00:00:00.048000	GE	AMB TOUCH	1	1	1	1	0	1	0	1	1	YOSHI	0	1	LOCOMOTION
6_25_18_(33)_2.eaf	00:00:49.609000	FE	PLAY FACE	1	1	1	0	1	1	0	1	1	YOSHI	1	1	PLAY
6_25_18_(33)_2.eaf	00:01:08.755000	GE	SWING/ROCK	1	1	1	1	1	1	0	1	1	GLENN	1	1	SEX
6_25_18_(33)_2.eaf	00:01:19.151000	GE	TAP/SLAP/KNOCK OBJECT	0	1	0	1	1	1	0	0	0	KIMA	1	1	PLAY
6_25_18_(34)_2.eaf	00:00:37.779000	FE	AMBIGUOUS FACE	1	1	1	1	1	1	1	1	1	BEN	1	1	AGONISTIC
6_25_18_(34)_2.eaf	00:00:43.926000	GE	PRESENT BODY PART	1	1	1	1	1	1	0	1	1	KIMA	1	1	AGONISTIC
6_25_18_(34)_2.eaf	00:00:47.756000	GE	AMB TOUCH	1	0	1	1	1	1	0	0	0	BEN	1	1	AGONISTIC
6_25_18_(34)_2.eaf	00:00:48.560000	FE	SCREAM FACE	1	1	1	1	1	0	0	0	0	KIMA	1	1	AGONISTIC
6_25_18_(34)_2.eaf	00:00:49.609000	GE	BITE	1	1	1	0	0	1	0	0	0	BEN	1	1	AGONISTIC
6_25_18_(34)_2.eaf	00:00:50.756000	GE	AMB TOUCH	1	1	1	1	0	1	1	0	1	BEN	1	1	AGONISTIC
6_25_18_(34)_2.eaf	00:00:55.633000	FE	BARED TEETH FACE	1	1	1	1	1	1	0	1	1	JEAN	1	1	AGONISTIC
6_25_18_(34)_2.eaf	00:00:56.633000	GE	EMBRACE	1	1	0	1	1	1	0	0	0	KIMA	1	1	AGONISTIC
6_25_18_(35)_2.eaf	00:00:27.081000	FE	BARED TEETH FACE	1	1	1	0	0	0	0	0	0	REGINA	0	0	LOCOMOTION
6_25_18_(36)_2.eaf	00:01:36.682000	GE	AMB TOUCH	1	1	1	1	1	1	0	1	1	JEAN	1	1	LOCOMOTION
6_25_18_(36)_2.eaf	00:01:36.999000	FE	AMBIGUOUS FACE	0	1	1	1	1	1	0	1	1	GLENN	1	1	LOCOMOTION
6_25_18_(39)_2.eaf	00:01:10.316000	GE	TAP/SLAP/KNOCK OBJECT	1	1	1	0	0	0	0	0	0	BEN	0	0	AGONISTIC
6_25_18_(4)_2.eaf	00:00:41.709000	GE	SWING/ROCK	1	1	1	1	0	1	0	1	1	SHAUN	1	1	SEX
6_25_18_(4)_2.eaf	00:00:42.039000	FE	LOWER LIP RELAXER FACE	1	1	1	1	0	1	0	1	1	SHAUN	1	1	SEX
6_25_18_(4)_2.eaf	00:00:49.611000	GE	TANDEM WALK	1	0	1	1	0	1	0	1	1	SHAUN	1	1	SEX
6_25_18_(40)_2.eaf	00:00:00.073000	FE	PANT HOOT FACE	1	1	1	0	0	0	0	0	0	BEN	0	0	AGONISTIC
6_25_18_(40)_2.eaf	00:00:22.438000	GE	TAP/SLAP/KNOCK OBJECT	1	1	0	0	0	0	0	0	0	BEN	0	0	AGONISTIC
6_25_18_(40)_2.eaf	00:00:24.560000	FE	AMBIGUOUS FACE	1	1	1	0	0	0	0	0	0	BEN	0	0	AGONISTIC
6_25_18_(5)_2.eaf	00:00:00.073000	GE	SWING/ROCK	1	1	1	0	1	1	0	1	1	SHAUN	1	1	AFFILIATIVE
6_25_18_(5)_2.eaf	00:00:04.341000	GE	BITE	1	1	1	1	1	1	0	1	1	SHAUN	1	1	AFFILIATIVE
6_25_18_(5)_2.eaf	00:00:07.463000	GE	BITE	1	1	0	1	1	1	0	1	1	YOSHI	1	1	AFFILIATIVE
6_25_18_(5)_2.eaf	00:00:08.951000	GE	BITE	0	1	1	1	1	1	0	1	1	SHAUN	1	1	AFFILIATIVE
6_25_18_(5)_2.eaf	00:00:13.634000	GE	PRESENT BODY PART	1	1	1	1	1	1	0	0	0	YOSHI	1	1	AFFILIATIVE
6_25_18_(5)_2.eaf	00:00:13.682000	FE	AMBIGUOUS FACE	1	1	1	1	0	1	0	0	0	YOSHI	1	1	AFFILIATIVE
6_25_18_(5)_2.eaf	00:00:18.317000	FE	BARED TEETH FACE	1	1	0	1	1	1	0	1	1	YOSHI	1	1	AFFILIATIVE
6_25_18_(5)_2.eaf	00:00:19.694000	GE	AMB TOUCH	1	1	0	1	0	1	0	0	0	YOSHI	1	1	AFFILIATIVE
6_25_18_(6)_2.eaf	00:00:13.352000	GE	AMB TOUCH	1	1	0	1	0	1	1	1	1	YOSHI	1	1	AFFILIATIVE
6_25_18_(6)_2.eaf	00:00:17.864000	GE	REACH	0	1	0	1	0	1	1	0	1	YOSHI	1	1	AFFILIATIVE
6_25_18_(6)_2.eaf	00:00:19.620000	GE	EMBRACE	1	1	0	1	1	1	0	0	0	BEN	1	1	AFFILIATIVE
6_25_18_(6)_2.eaf	00:00:20.401000	GE	AMB TOUCH	0	1	0	1	0	1	0	0	0	YOSHI	1	1	AFFILIATIVE
6_25_18_(6)_2.eaf	00:00:59.142000	GE	BITE	0	1	1	1	1	1	0	1	1	REGINA	1	1	AFFILIATIVE
6_25_18_(9)_2.eaf	00:00:05.707000	FE	LIPSMACKING FACE	0	1	0	0	1	1	0	0	0	SHAUN	1	0	GROOM
6_25_19 (1).eaf	00:00:16.619000	GE	EMBRACE	1	1	1	1	1	1	0	1	1	GLENN	1	1	AFFILIATIVE
6_25_19 (1).eaf	00:00:19.268000	GE	BITE	0	1	0	1	0	1	0	0	0	JERRARD	1	1	AFFILIATIVE
6_25_19 (10).eaf	00:00:10.188000	GE	ARM RAISE	1	1	0	1	1	1	0	0	0	JULIE	1	1	AFFILIATIVE
6_25_19 (10).eaf	00:00:11.648000	GE	EMBRACE	1	1	1	1	0	1	0	0	0	JULIE	1	1	AFFILIATIVE
6_25_19 (10).eaf	00:00:13.621000	GE	SWING/ROCK	1	1	1	0	0	1	0	0	0	JULIE	1	1	AFFILIATIVE
6_25_19 (12).eaf	00:00:03.810000	GE	AMB TOUCH	1	1	1	1	1	1	0	1	1	GLENN	1	1	AFFILIATIVE
6_25_19 (14).eaf	00:00:06.337000	GE	AMB TOUCH	1	1	1	0	0	1	1	1	1	JERRARD	0	1	AFFILIATIVE
6_25_19 (2).eaf	00:00:02.810000	GE	AMB TOUCH	1	1	1	1	1	1	1	1	1	JULIE	1	1	AFFILIATIVE
6_25_19 (2).eaf	00:00:09.459000	GE	EMBRACE	1	1	1	1	0	1	0	0	0	JULIE	1	1	AFFILIATIVE
6_25_19 (4).eaf	00:00:04.432000	GE	AMB TOUCH	1	1	1	1	1	1	0	0	0	GLENN	1	1	AFFILIATIVE
6_25_19 (4).eaf	00:00:07.378000	GE	PRESENT BODY PART	1	1	1	0	1	1	0	1	1	JERRARD	1	1	AFFILIATIVE
6_25_19 (8).eaf	00:00:07.823000	FE	LOWER LIP RELAXER FACE	1	1	1	0	0	1	0	1	1	KIMA	0	1	FOOD
6_25_19 (8).eaf	00:00:09.958000	GE	LOOK	1	1	1	1	0	1	0	1	1	KIMA	0	1	FOOD
6_26_18_(10)_2.eaf	00:00:05	FE	AMBIGUOUS FACE	1	1	1	1	1	1	1	1	1	GRACIE	1	1	AFFILIATIVE
6_26_18_(10)_2.eaf	00:00:06.951000	GE	AMB TOUCH	1	1	0	1	1	1	1	0	1	GLENN	1	1	AFFILIATIVE
6_26_18_(10)_2.eaf	00:00:08.146000	GE	PRESENT BODY PART	0	1	1	1	1	1	0	1	1	GRACIE	1	1	AFFILIATIVE
6_26_18_(11)_2.eaf	00:00:39.304000	FE	AMBIGUOUS FACE	1	1	1	0	0	1	1	1	1	JEAN	0	1	AFFILIATIVE
6_26_18_(11)_2.eaf	00:00:45.084000	FE	AMBIGUOUS FACE	1	1	1	1	1	1	0	1	1	JEAN	0	1	AFFILIATIVE
6_26_18_(11)_2.eaf	00:03:41.780000	FE	AMBIGUOUS FACE	1	1	1	1	0	1	1	1	1	REGINA	1	1	GROOM
6_26_18_(11)_2.eaf	00:03:42.580000	GE	CLAP	1	1	1	1	0	1	0	1	1	REGINA	1	1	GROOM
6_26_18_(11)_2.eaf	00:03:46.824000	GE	AMB TOUCH	0	1	0	1	0	1	1	0	1	REGINA	1	1	GROOM
6_26_18_(11)_2.eaf	00:06:10.189000	GE	PIROUETTE	1	1	1	1	0	1	0	1	1	UKI	1	1	PLAY
6_26_18_(11)_2.eaf	00:06:11.278000	FE	PLAY FACE	1	1	1	1	0	1	0	1	1	UKI	1	1	PLAY
6_26_18_(11)_2.eaf	00:06:13.855000	FE	PLAY FACE	1	1	1	1	0	1	0	1	1	JEAN	1	1	PLAY
6_26_18_(12)_2.eaf	00:00:36.341000	GE	PIROUETTE	1	1	1	0	0	1	1	0	1	UKI	0	1	PLAY
6_26_18_(12)_2.eaf	00:00:43.682000	GE	TAP/SLAP/KNOCK OBJECT	1	1	1	0	0	1	1	1	1	UKI	0	1	PLAY
6_26_18_(13)_2.eaf	00:01:45.595000	GE	PUSH	1	1	1	1	0	1	1	1	1	UKI	1	1	PLAY
6_26_18_(13)_2.eaf	00:01:52.253000	GE	AMB TOUCH	1	1	1	1	1	1	0	1	1	GRACIE	1	1	PLAY
6_26_18_(13)_2.eaf	00:01:52.643000	FE	AMBIGUOUS FACE	1	1	1	1	1	1	0	1	1	GRACIE	1	1	PLAY
6_26_18_(13)_2.eaf	00:03:05.431000	GE	AMB TOUCH	1	1	1	0	0	1	0	1	1	UKI	1	1	PLAY
6_26_18_(13)_2.eaf	00:03:09.142000	GE	PUSH	1	1	1	1	0	1	1	1	1	UKI	1	1	PLAY
6_26_18_(13)_2.eaf	00:03:12.243000	GE	SLAP OTHER	1	1	1	1	1	1	0	1	1	GRACIE	1	1	PLAY
6_26_18_(13)_2.eaf	00:03:12.383000	FE	PLAY FACE	1	1	1	0	0	1	1	1	1	UKI	1	1	PLAY
6_26_18_(13)_2.eaf	00:03:14.573000	GE	PUNCH OTHER	0	1	0	1	0	1	1	0	1	UKI	1	1	PLAY
6_26_18_(14)_2.eaf	00:01:15.755000	GE	TAP/SLAP/KNOCK OBJECT	1	1	1	0	0	1	1	1	1	UKI	1	1	PLAY
6_26_18_(14)_2.eaf	00:01:20.011000	GE	SLAP OTHER WITH OBJECT	1	1	1	1	1	1	0	1	1	UKI	1	1	PLAY
6_26_18_(14)_2.eaf	00:04:17.591000	FE	PLAY FACE	1	1	1	0	1	1	1	1	1	UKI	1	1	PLAY
6_26_18_(14)_2.eaf	00:04:18.700000	GE	SLAP OTHER	1	1	1	1	1	1	0	1	1	UKI	1	1	PLAY
6_26_18_(14)_2.eaf	00:04:19.651000	FE	AMBIGUOUS FACE	1	1	1	0	1	1	1	1	1	JEAN	1	1	PLAY
6_26_18_(14)_2.eaf	00:04:22.147000	GE	PUSH	1	1	1	1	1	1	1	0	1	JEAN	1	1	PLAY
6_26_18_(14)_2.eaf	00:04:25.591000	FE	AMBIGUOUS FACE	1	1	1	1	1	1	0	1	1	JEAN	1	1	PLAY
6_26_18_(14)_2.eaf	00:04:26.134000	FE	PLAY FACE	1	1	1	1	1	1	0	1	1	UKI	1	1	PLAY
6_26_18_(14)_2.eaf	00:04:27.264000	GE	SLAP OTHER	1	1	1	1	1	1	0	1	1	UKI	1	1	PLAY
6_26_18_(14)_2.eaf	00:04:28.199000	GE	PUSH	1	1	1	1	1	1	0	1	1	JEAN	1	1	PLAY
6_26_18_(14)_2.eaf	00:04:34.944000	FE	PLAY FACE	1	1	1	1	0	1	0	1	1	KIMA	1	1	PLAY
6_26_18_(14)_2.eaf	00:04:35.424000	GE	ARM RAISE	1	1	0	1	1	1	1	1	1	JEAN	1	1	PLAY
6_26_18_(14)_2.eaf	00:04:36.377000	FE	PANT HOOT FACE	1	1	1	1	1	1	1	1	1	JEAN	1	1	PLAY
6_26_18_(14)_2.eaf	00:04:38.553000	GE	SLAP OTHER	1	1	1	1	1	1	1	1	1	JEAN	1	1	PLAY
6_26_18_(15)_2.eaf	00:00:35.512000	GE	SWING/ROCK	1	1	1	1	1	1	0	1	1	SHAUN	1	1	AFFILIATIVE
6_26_18_(15)_2.eaf	00:00:35.902000	FE	PANT HOOT FACE	1	1	1	1	1	1	1	1	1	REGINA	1	1	AFFILIATIVE
6_26_18_(15)_2.eaf	00:00:39.755000	GE	PRESENT BODY PART	0	1	1	1	1	1	0	1	1	REGINA	1	1	AFFILIATIVE
6_26_18_(15)_2.eaf	00:00:41.097000	GE	AMB TOUCH	1	1	1	1	0	1	0	0	0	SHAUN	1	1	AFFILIATIVE
6_26_18_(16)_2.eaf	00:00:26.233000	FE	AMBIGUOUS FACE	1	1	1	1	1	1	0	1	1	REGINA	1	1	AFFILIATIVE
6_26_18_(16)_2.eaf	00:00:29.306000	FE	AMBIGUOUS FACE	1	1	1	1	1	1	0	1	1	REGINA	1	1	AFFILIATIVE
6_26_18_(16)_2.eaf	00:00:29.819000	GE	EMBRACE	1	1	0	1	1	1	0	0	0	SHAUN	1	1	AFFILIATIVE
6_26_18_(16)_2.eaf	00:00:32.331000	GE	AMB TOUCH	0	1	0	0	0	1	0	0	0	REGINA	1	1	AFFILIATIVE
6_26_18_(17)_2.eaf	00:04:09.804000	FE	PANT HOOT FACE	1	1	1	1	0	0	0	0	0	JAKE	1	0	AROUSAL (GENERAL)
6_26_18_(17)_2.eaf	00:04:11.731000	FE	LOWER LIP RELAXER FACE	1	1	1	1	0	1	0	1	1	UKI	1	0	AROUSAL (GENERAL)
6_26_18_(17)_2.eaf	00:05:53.218000	FE	PANT HOOT FACE	1	1	1	0	0	0	0	0	0	REGINA	0	0	AROUSAL (GENERAL)
6_26_18_(18)_2.eaf	00:00:28.121000	FE	PANT HOOT FACE	1	1	1	1	0	0	0	0	0	REGINA	1	0	AROUSAL (GENERAL)
6_26_18_(18)_2.eaf	00:00:37.267000	FE	PANT HOOT FACE	1	1	1	0	0	0	0	0	0	NAN	1	0	AROUSAL (GENERAL)
6_26_18_(18)_2.eaf	00:01:18.609000	FE	PANT HOOT FACE	1	1	1	0	0	0	0	0	0	REGINA	0	0	AROUSAL (GENERAL)
6_26_18_(18)_2.eaf	00:04:34.682000	FE	SCREAM FACE	1	1	1	1	1	1	0	0	0	NAN	1	1	AGONISTIC
6_26_18_(18)_2.eaf	00:04:35.853000	GE	CLAP	1	1	0	1	1	1	0	0	0	SHAUN	1	1	AGONISTIC
6_26_18_(2)_2.eaf	00:00:17.141000	GE	LOOK	0	1	1	0	1	1	0	1	1	KIMA	0	1	FOOD
6_26_18_(2)_2.eaf	00:00:25.829000	FE	POUT FACE	1	1	1	0	0	1	1	1	1	KIMA	1	1	LOCOMOTION
6_26_18_(20)_2.eaf	00:00:00.073000	FE	PANT HOOT FACE	1	1	1	1	0	0	0	0	0	JAKE	1	0	AROUSAL (GENERAL)
6_26_18_(20)_2.eaf	00:00:06.146000	FE	PANT HOOT FACE	1	1	1	1	0	0	0	0	0	YOSHI	1	0	AROUSAL (GENERAL)
6_26_18_(20)_2.eaf	00:00:30.048000	FE	PANT HOOT FACE	1	1	1	1	0	0	0	0	0	JEAN	1	0	AROUSAL (GENERAL)
6_26_18_(20)_2.eaf	00:00:44.730000	FE	PANT HOOT FACE	1	1	1	1	0	0	0	0	0	REGINA	1	0	AROUSAL (GENERAL)
6_26_18_(20)_2.eaf	00:02:02.575000	FE	PANT HOOT FACE	1	1	1	1	0	0	0	0	0	NAN	1	0	AROUSAL (GENERAL)
6_26_18_(20)_2.eaf	00:02:15.147000	FE	PANT HOOT FACE	1	1	1	1	1	1	1	1	1	ZURI	1	0	AROUSAL (GENERAL)
6_26_18_(20)_2.eaf	00:02:20.671000	GE	SWING/ROCK	1	1	0	1	1	1	1	0	1	ZURI	1	0	AROUSAL (GENERAL)
6_26_18_(20)_2.eaf	00:02:25.586000	FE	PANT HOOT FACE	1	1	1	1	0	1	0	1	1	ZURI	1	0	AROUSAL (GENERAL)
6_26_18_(20)_2.eaf	00:02:53.260000	FE	LOWER LIP RELAXER FACE	1	1	1	0	0	0	1	1	1	UKI	1	1	PLAY
6_26_18_(20)_2.eaf	00:02:54.800000	GE	SLAP OTHER WITH OBJECT	1	1	1	1	1	0	0	1	1	UKI	1	1	PLAY
6_26_18_(20)_2.eaf	00:02:58.194000	GE	REACH	1	1	1	1	1	1	1	0	1	ZURI	1	1	PLAY
6_26_18_(20)_2.eaf	00:03:25.118000	FE	PANT HOOT FACE	1	1	1	1	1	1	0	1	1	NAN	1	1	PLAY
6_26_18_(20)_2.eaf	00:03:25.413000	GE	REACH	1	1	0	1	1	1	1	0	1	NAN	1	1	PLAY
6_26_18_(23)_2.eaf	00:00:00.050000	FE	PANT HOOT FACE	1	1	1	1	1	1	0	1	1	KIMA	1	1	AFFILIATIVE
6_26_18_(23)_2.eaf	00:00:02.449000	GE	JUMP	1	1	0	1	1	1	1	0	1	KIMA	1	1	AFFILIATIVE
6_26_18_(23)_2.eaf	00:00:02.829000	GE	ARM RAISE	1	1	0	1	1	1	1	0	1	KIMA	1	1	AFFILIATIVE
6_26_18_(6)_2.eaf	00:00:00.121000	FE	PANT HOOT FACE	1	1	1	0	0	0	0	0	0	BEN	0	0	AGONISTIC
6_26_18_(6)_2.eaf	00:00:37.560000	GE	TAP/SLAP/KNOCK OBJECT	1	1	0	0	0	0	0	0	0	BEN	0	0	AGONISTIC
6_26_18_(6)_2.eaf	00:00:40.145000	FE	RASPBERRY FACE	1	1	1	0	0	0	0	0	0	BEN	0	0	AGONISTIC
6_26_18_(7)_2.eaf	00:00:00.121000	FE	BARED TEETH FACE	1	1	1	0	0	0	0	0	0	REGINA	0	0	REST
6_27_19 (1).eaf	00:00:02.162000	GE	ARM RAISE	1	1	0	1	1	1	0	0	0	JOHARI	1	1	PLAY
6_27_19 (1).eaf	00:00:03.783000	GE	STOMP	1	1	0	1	1	1	0	0	0	JOHARI	1	1	PLAY
6_27_19 (1).eaf	00:00:04.324000	GE	AMB TOUCH	1	1	0	1	1	1	0	0	0	JOHARI	1	1	PLAY
6_27_19 (1).eaf	00:00:05.891000	GE	HAND FLING	0	1	0	0	0	1	0	0	0	JULIE	1	1	PLAY
6_27_19 (2).eaf	00:00:03.540000	GE	AMB TOUCH	1	1	1	1	1	1	0	1	1	JOHARI	1	1	AFFILIATIVE
6_27_19 (4).eaf	00:00:01.513000	GE	SWING/ROCK	1	1	1	1	0	0	0	0	0	GLENN	1	0	AGONISTIC
6_27_19 (4).eaf	00:00:18.918000	GE	TAP/SLAP/KNOCK OBJECT	1	1	1	0	0	0	0	0	0	GLENN	1	0	AGONISTIC
6_27_19 (4).eaf	00:00:27.674000	GE	TAP/SLAP/KNOCK OBJECT	1	1	1	1	0	0	0	0	0	GLENN	1	0	AGONISTIC
6_27_19 (4).eaf	00:00:31.621000	GE	TAP/SLAP/KNOCK OBJECT	1	1	1	0	0	0	0	0	0	GLENN	1	0	AGONISTIC
6_27_19 (4).eaf	00:00:36.891000	GE	TAP/SLAP/KNOCK OBJECT	1	1	1	0	0	0	0	0	0	GLENN	1	0	AGONISTIC
6_27_19 (4).eaf	00:00:43.161000	GE	TAP/SLAP/KNOCK OBJECT	1	1	1	0	0	0	0	0	0	GLENN	1	0	AGONISTIC
6_27_19 (4).eaf	00:00:48.647000	GE	TAP/SLAP/KNOCK OBJECT	1	1	0	0	0	0	0	0	0	GLENN	1	0	AGONISTIC
6_27_19 (6).eaf	00:00:04.459000	GE	AMB TOUCH	1	1	1	1	1	1	1	1	1	JOHARI	1	1	LOCOMOTION
6_27_19 (7).eaf	00:00:03.567000	GE	SWING/ROCK	1	1	1	1	1	1	0	1	1	SHAUN	1	1	LOCOMOTION
6_28_18_(1)_2.eaf	00:03:42.821000	GE	SLAP OTHER	1	1	1	1	1	1	1	0	1	ZURI	1	1	AGONISTIC
6_28_18_(1)_2.eaf	00:03:43.382000	FE	SCREAM FACE	1	1	0	1	1	1	1	0	1	ZURI	1	1	AGONISTIC
6_28_18_(1)_2.eaf	00:03:43.528000	FE	SCREAM FACE	1	1	1	1	1	1	1	1	1	JEAN	1	1	AGONISTIC
6_28_18_(1)_2.eaf	00:03:44.699000	GE	SLAP OTHER	1	1	1	1	1	0	1	1	1	ZURI	1	1	AGONISTIC
6_28_18_(1)_2.eaf	00:03:46.675000	FE	PANT HOOT FACE	1	1	1	1	1	1	1	1	1	JEAN	1	1	AGONISTIC
6_28_18_(1)_2.eaf	00:03:46.965000	GE	HAND FLING	1	1	0	1	1	1	1	0	1	JEAN	1	1	AGONISTIC
6_28_18_(1)_2.eaf	00:03:47.041000	FE	SCREAM FACE	1	1	1	1	0	1	1	1	1	JOHARI	1	1	AGONISTIC
6_28_18_(1)_2.eaf	00:03:47.547000	GE	SLAP OTHER WITH OBJECT	1	1	0	1	1	1	1	0	1	JOHARI	1	1	AGONISTIC
6_28_18_(10)_2.eaf	00:00:15.671000	FE	PANT HOOT FACE	1	1	1	1	0	0	0	0	0	GLENN	1	0	AROUSAL (GENERAL)
6_28_18_(10)_2.eaf	00:00:19.500000	FE	PANT HOOT FACE	1	1	1	1	0	1	0	1	1	NAN	1	0	AROUSAL (GENERAL)
6_28_18_(10)_2.eaf	00:00:21.013000	GE	EMBRACE	1	1	0	0	0	1	0	0	0	NAN	1	0	AROUSAL (GENERAL)
6_28_18_(12)_2.eaf	00:00:14.145000	GE	PUSH	1	1	1	0	0	1	1	0	1	JOHARI	1	1	LOCOMOTION
6_28_18_(12)_2.eaf	00:00:18.731000	GE	PUSH	1	1	1	1	0	1	0	1	1	JOHARI	1	1	LOCOMOTION
6_28_18_(12)_2.eaf	00:01:24.411000	GE	AMB TOUCH	1	1	1	1	0	1	0	1	1	UKI	1	1	FOOD
6_28_18_(12)_2.eaf	00:01:28.874000	FE	AMBIGUOUS FACE	1	1	1	1	0	1	0	1	1	UKI	1	1	FOOD
6_28_18_(12)_2.eaf	00:02:33.962000	GE	AMB TOUCH	1	0	0	1	1	1	1	0	1	SHAUN	1	1	SEX
6_28_18_(12)_2.eaf	00:02:37.084000	GE	AMB TOUCH	0	1	0	1	0	1	0	0	0	SHAUN	1	1	SEX
6_28_18_(13)_2.eaf	00:01:58.787000	GE	LOOK	1	1	1	0	0	1	0	1	1	UKI	0	1	FOOD
6_28_18_(14)_2.eaf	00:00:04.390000	GE	AMB TOUCH	1	1	1	1	0	1	0	1	1	JOHARI	1	1	LOCOMOTION
6_28_18_(15)_2.eaf	00:00:17.666000	GE	STOMP	1	1	1	1	1	1	0	1	1	JOHARI	1	1	AFFILIATIVE
6_28_18_(15)_2.eaf	00:00:20.910000	GE	ARM RAISE	1	1	0	0	1	1	0	0	0	JOHARI	1	1	AFFILIATIVE
6_28_18_(18)_2.eaf	00:00:47.381000	GE	TAP/SLAP/KNOCK OBJECT	1	1	1	1	1	1	1	1	1	JEAN	1	1	PLAY
6_28_18_(18)_2.eaf	00:00:48.381000	FE	PLAY FACE	1	1	1	1	1	1	0	1	1	JEAN	1	1	PLAY
6_28_18_(18)_2.eaf	00:02:05.572000	FE	PLAY FACE	1	1	1	1	1	1	1	1	1	JEAN	1	1	PLAY
6_28_18_(18)_2.eaf	00:02:05.914000	GE	OBJECT MOVE	1	1	1	1	1	1	1	1	1	JEAN	1	1	PLAY
6_28_18_(20)_2.eaf	00:00:06.414000	GE	PUSH	1	1	1	0	0	1	0	1	1	JOHARI	0	1	LOCOMOTION
6_28_18_(20)_2.eaf	00:01:08.950000	FE	PANT HOOT FACE	1	1	1	1	0	0	0	0	0	BEN	0	0	AROUSAL (GENERAL)
6_28_18_(20)_2.eaf	00:01:22.097000	FE	PANT HOOT FACE	1	1	1	1	0	1	0	1	1	ZURI	0	0	AROUSAL (GENERAL)
6_28_18_(20)_2.eaf	00:01:55.779000	GE	LOOK	1	1	1	1	0	1	0	1	1	JOHARI	1	1	FOOD
6_28_18_(20)_2.eaf	00:02:06.292000	GE	LOOK	1	1	1	1	0	1	0	1	1	UKI	1	1	FOOD
6_28_18_(20)_2.eaf	00:02:10.438000	GE	LOOK	1	1	1	0	0	1	0	1	1	ZOE	1	1	FOOD
6_28_18_(20)_2.eaf	00:02:19.609000	GE	AMB TOUCH	1	1	1	1	0	1	0	0	0	JOHARI	1	1	LOCOMOTION
6_28_18_(5)_2.eaf	00:01:25.702000	GE	PUSH	1	1	0	1	0	1	0	0	0	JOHARI	1	1	LOCOMOTION
6_28_18_(6)_2.eaf	00:00:11.023000	FE	PANT HOOT FACE	1	1	1	1	0	0	0	0	0	JEAN	0	0	AROUSAL (GENERAL)
6_28_18_(6)_2.eaf	00:00:33.317000	GE	PUSH	0	1	1	0	0	1	0	1	1	JOHARI	1	1	LOCOMOTION
6_28_18_(6)_2.eaf	00:01:00.584000	GE	PUSH	0	1	1	1	0	1	0	1	1	JOHARI	1	1	LOCOMOTION
6_28_18_(7)_2.eaf	00:01:11.219000	GE	AMB TOUCH	1	1	1	1	0	1	0	1	1	JOHARI	1	1	FOOD
6_29_18_(1)_2.eaf	00:00:06.845000	FE	SCREAM FACE	1	1	1	0	1	1	0	1	1	UKI	1	1	FOOD
6_29_18_(1)_2.eaf	00:00:07.397000	GE	SLAP OTHER	1	1	1	1	1	1	0	1	1	UKI	1	1	FOOD
6_29_18_(1)_2.eaf	00:00:10.069000	FE	PANT HOOT FACE	1	1	0	1	0	1	0	1	1	JOHARI	1	1	FOOD
6_29_18_(1)_2.eaf	00:00:10.357000	GE	AMB TOUCH	1	1	1	1	1	1	1	1	1	JOHARI	1	1	FOOD
6_29_18_(1)_2.eaf	00:00:16.017000	FE	PANT HOOT FACE	1	1	1	0	1	1	1	1	1	OLIVER	1	1	FOOD
6_29_18_(1)_2.eaf	00:00:19.112000	GE	JUMP	1	1	0	1	1	1	0	1	1	OLIVER	1	1	FOOD
6_29_18_(1)_2.eaf	00:00:19.353000	GE	SLAP OTHER	1	1	0	1	1	1	0	0	0	UKI	1	1	FOOD
6_29_18_(1)_2.eaf	00:00:30.957000	GE	AMB TOUCH	1	1	1	1	0	1	0	1	1	JEAN	1	1	FOOD
6_29_18_(1)_2.eaf	00:03:52.601000	GE	AMB TOUCH	0	1	0	1	0	1	0	0	0	UKI	1	1	AFFILIATIVE
6_29_18_(10)_2.eaf	00:00:15.511000	GE	LOOK	1	1	1	0	0	1	0	1	1	OLIVER	0	1	FOOD
6_29_18_(10)_2.eaf	00:00:54.267000	GE	AMB TOUCH	0	1	1	1	0	1	0	1	1	KIMA	1	1	LOCOMOTION
6_29_18_(10)_2.eaf	00:01:01.364000	GE	AMB TOUCH	1	1	1	1	0	1	0	1	1	KIMA	1	1	LOCOMOTION
6_29_18_(10)_2.eaf	00:01:04.992000	GE	AMB TOUCH	1	1	0	1	0	1	0	0	0	OLIVER	1	1	LOCOMOTION
6_29_18_(11)_2.eaf	00:00:03.634000	GE	PRESENT CLIMB ON ME	0	1	1	1	1	1	0	1	1	KIMA	1	1	LOCOMOTION
6_29_18_(11)_2.eaf	00:00:06.829000	GE	TANDEM WALK	1	1	1	1	0	1	0	1	1	OLIVER	1	1	LOCOMOTION
6_29_18_(11)_2.eaf	00:00:29.755000	GE	TANDEM WALK	1	1	0	1	0	1	0	0	0	KIMA	1	1	LOCOMOTION
6_29_18_(12)_2.eaf	00:00:33.499000	GE	AMB TOUCH	0	1	1	1	0	1	0	1	1	JULIE	1	1	LOCOMOTION
6_29_18_(12)_2.eaf	00:00:55.984000	GE	EMBRACE	1	1	1	1	1	1	0	0	0	KIMA	1	1	AFFILIATIVE
6_29_18_(12)_2.eaf	00:03:54.432000	GE	SWING/ROCK	0	1	1	0	0	1	0	0	0	OLIVER	1	1	AFFILIATIVE
6_29_18_(12)_2.eaf	00:04:35.109000	GE	EMBRACE	1	1	1	1	1	1	0	1	1	KIMA	1	1	AFFILIATIVE
6_29_18_(12)_2.eaf	00:04:38.852000	GE	EMBRACE	1	1	1	0	1	1	0	0	0	OLIVER	1	1	AFFILIATIVE
6_29_18_(12)_2.eaf	00:04:39.367000	GE	SWING/ROCK	0	1	1	1	1	1	0	0	0	OLIVER	1	1	AFFILIATIVE
6_29_18_(12)_2.eaf	00:05:05.915000	GE	DANGLE	1	1	1	1	1	1	0	1	1	OLIVER	1	1	PLAY
6_29_18_(12)_2.eaf	00:05:06.794000	FE	PLAY FACE	1	1	1	1	1	1	1	1	1	OLIVER	1	1	PLAY
6_29_18_(12)_2.eaf	00:06:14.941000	GE	STOMP	1	1	1	0	0	0	0	1	1	JOHARI	0	1	PLAY
6_29_18_(12)_2.eaf	00:06:17.881000	GE	TAP/SLAP/KNOCK OBJECT	1	1	1	0	0	0	1	1	1	JOHARI	0	1	PLAY
6_29_18_(14)_2.eaf	00:01:29.975000	GE	THROW OBJECT	0	1	1	1	0	1	0	1	1	JOHARI	1	1	PLAY
6_29_18_(14)_2.eaf	00:01:39.317000	FE	PLAY FACE	1	1	1	1	1	1	1	1	1	JOHARI	1	1	PLAY
6_29_18_(14)_2.eaf	00:01:40.389000	GE	ARM RAISE	1	1	0	1	1	1	0	0	0	JOHARI	1	1	PLAY
6_29_18_(14)_2.eaf	00:01:40.926000	GE	EMBRACE	1	1	1	1	1	1	0	0	0	OLIVER	1	1	PLAY
6_29_18_(14)_2.eaf	00:01:40.975000	FE	PLAY FACE	1	1	1	1	1	1	0	0	0	OLIVER	1	1	PLAY
6_29_18_(14)_2.eaf	00:02:01.877000	GE	TAP/SLAP/KNOCK OBJECT	0	1	1	1	1	1	0	1	1	KIMA	1	1	PLAY
6_29_18_(14)_2.eaf	00:02:02.511000	FE	PLAY FACE	1	1	1	0	1	1	0	1	1	OLIVER	1	1	PLAY
6_29_18_(14)_2.eaf	00:02:03.365000	GE	TAP/SLAP/KNOCK OBJECT	1	1	1	1	1	1	0	1	1	OLIVER	1	1	PLAY
6_29_18_(15)_2.eaf	00:02:03.028000	FE	PLAY FACE	1	1	0	1	1	1	1	1	1	KIMA	1	1	PLAY
6_29_18_(15)_2.eaf	00:02:27.996000	GE	DANGLE	1	1	1	1	1	1	0	1	1	OLIVER	1	1	PLAY
6_29_18_(15)_2.eaf	00:03:11.352000	GE	AMB TOUCH	1	1	0	1	0	1	1	0	1	KIMA	1	1	PLAY
6_29_18_(15)_2.eaf	00:03:13.083000	FE	PLAY FACE	1	1	0	1	0	1	1	1	1	JOHARI	1	1	PLAY
6_29_18_(15)_2.eaf	00:03:19.645000	FE	PLAY FACE	1	1	1	1	1	1	0	1	1	OLIVER	1	1	PLAY
6_29_18_(15)_2.eaf	00:03:20.230000	FE	PLAY FACE	1	1	1	1	1	1	0	1	1	KIMA	1	1	PLAY
6_29_18_(15)_2.eaf	00:03:20.230000	GE	AMB TOUCH	1	1	0	1	1	1	1	0	1	KIMA	1	1	PLAY
6_29_18_(18)_2.eaf	00:01:19.581000	GE	ARM RAISE	0	1	0	1	1	1	1	0	1	JULIE	1	1	LOCOMOTION
6_29_18_(2)_2.eaf	00:00:16.974000	FE	LOWER LIP RELAXER FACE	1	1	1	1	1	1	0	1	1	GLENN	1	1	AFFILIATIVE
6_29_18_(2)_2.eaf	00:00:19.462000	GE	BITE	0	1	1	1	1	1	0	0	0	GLENN	1	1	AFFILIATIVE
6_29_18_(2)_2.eaf	00:00:19.779000	GE	BITE	1	1	1	1	1	1	1	0	1	JULIE	1	1	AFFILIATIVE
6_29_18_(2)_2.eaf	00:00:23.730000	GE	AMB TOUCH	0	1	0	1	1	1	1	1	1	JULIE	1	1	AFFILIATIVE
6_29_18_(21)_2.eaf	00:00:07.024000	FE	AMBIGUOUS FACE	1	1	1	1	1	1	0	1	1	GLENN	1	1	AFFILIATIVE
6_29_18_(21)_2.eaf	00:00:10.463000	GE	ARM RAISE	1	1	0	1	1	1	0	0	0	GLENN	1	1	AFFILIATIVE
6_29_18_(21)_2.eaf	00:00:11.317000	GE	BITE	1	1	0	1	0	1	0	0	0	GLENN	1	1	AFFILIATIVE
6_29_18_(24)_2.eaf	00:00:00.121000	GE	JUMP	1	1	1	1	0	1	0	1	1	JOHARI	1	1	PLAY
6_29_18_(24)_2.eaf	00:00:00.317000	FE	PLAY FACE	1	1	1	1	0	1	0	1	1	JOHARI	1	1	PLAY
6_29_18_(24)_2.eaf	00:00:00.390000	GE	ARM RAISE	0	1	1	1	1	1	0	1	1	JEAN	1	1	PLAY
6_29_18_(24)_2.eaf	00:00:01.146000	GE	CLAP	1	1	1	0	0	0	1	1	1	OLIVER	1	1	PLAY
6_29_18_(24)_2.eaf	00:00:02.560000	FE	PLAY FACE	1	1	1	0	0	0	0	1	1	OLIVER	1	1	PLAY
6_29_18_(24)_2.eaf	00:00:58.411000	GE	AMB TOUCH	1	1	1	0	0	1	1	1	1	JULIE	1	1	AFFILIATIVE
6_29_18_(24)_2.eaf	00:01:04.234000	GE	AMB TOUCH	1	1	0	1	0	1	0	1	1	JULIE	1	1	AFFILIATIVE
6_29_18_(24)_2.eaf	00:01:05.528000	GE	AMB TOUCH	0	1	0	0	0	1	0	0	0	JULIE	1	1	AFFILIATIVE
6_29_18_(3)_2.eaf	00:00:15.171000	FE	PANT HOOT FACE	1	1	0	1	1	1	1	1	1	JERRARD	1	1	LOCOMOTION
6_29_18_(3)_2.eaf	00:00:16.079000	GE	HAND FLING	0	1	1	0	1	1	1	0	1	JERRARD	1	1	LOCOMOTION
6_29_18_(3)_2.eaf	00:00:18.738000	GE	HAND FLING	1	1	0	1	1	1	1	0	1	JERRARD	1	1	LOCOMOTION
6_29_18_(3)_2.eaf	00:02:05.844000	FE	PANT HOOT FACE	1	1	1	0	0	1	0	1	1	JEAN	1	1	AFFILIATIVE
6_29_18_(3)_2.eaf	00:02:06.368000	GE	SWING/ROCK	1	1	1	1	0	1	1	1	1	JEAN	1	1	AFFILIATIVE
6_29_18_(3)_2.eaf	00:02:23.852000	GE	AMB TOUCH	1	1	1	1	0	1	0	1	1	JEAN	1	1	AFFILIATIVE
6_29_18_(3)_2.eaf	00:03:02.944000	FE	AMBIGUOUS FACE	1	1	0	1	1	1	1	1	1	REGINA	1	1	AFFILIATIVE
6_29_18_(3)_2.eaf	00:03:03.554000	GE	AMB TOUCH	1	1	0	1	1	1	1	0	1	REGINA	1	1	AFFILIATIVE
6_29_18_(3)_2.eaf	00:03:04.310000	GE	BITE	1	1	1	1	1	1	1	1	1	GLENN	1	1	AFFILIATIVE
6_29_18_(3)_2.eaf	00:03:05.139000	GE	PRESENT BODY PART	0	1	1	1	1	1	0	1	1	REGINA	1	1	AFFILIATIVE
6_29_18_(3)_2.eaf	00:03:09.895000	FE	LOWER LIP RELAXER FACE	0	1	1	0	0	1	0	1	1	GLENN	0	1	FOOD
6_29_18_(31)_2.eaf	00:00:31.999000	GE	PUSH	1	1	1	1	0	1	1	1	1	JERRARD	1	1	LOCOMOTION
6_29_18_(31)_2.eaf	00:00:46.333000	GE	PUSH	1	1	1	1	0	1	0	0	0	JERRARD	1	1	LOCOMOTION
6_29_18_(31)_2.eaf	00:00:49.444000	GE	PUSH	1	1	1	1	0	1	0	0	0	JERRARD	1	1	LOCOMOTION
6_29_18_(31)_2.eaf	00:03:03.565000	GE	PUSH	1	1	1	1	0	1	0	0	0	JERRARD	1	1	LOCOMOTION
6_29_18_(31)_2.eaf	00:03:19.064000	GE	PUSH	1	1	1	1	0	1	0	0	0	JERRARD	1	1	LOCOMOTION
6_29_18_(31)_2.eaf	00:03:36.660000	GE	EMBRACE	1	1	0	1	1	0	0	1	1	OLIVER	1	1	AFFILIATIVE
6_29_18_(31)_2.eaf	00:03:38.940000	GE	BITE	1	1	0	1	1	1	0	0	0	JOHARI	1	1	AFFILIATIVE
6_29_18_(31)_2.eaf	00:05:17.760000	GE	AMB TOUCH	1	1	0	1	1	1	1	1	1	JOHARI	1	1	LOCOMOTION
6_29_18_(31)_2.eaf	00:05:19.440000	FE	POUT FACE	1	1	1	1	0	1	1	1	1	JOHARI	1	1	LOCOMOTION
6_29_18_(31)_2.eaf	00:05:48.520000	GE	AMB TOUCH	0	1	0	1	1	1	1	1	1	JOHARI	1	1	LOCOMOTION
6_29_18_(31)_2.eaf	00:05:50.080000	GE	TANDEM WALK	1	1	1	0	1	1	0	0	0	OLIVER	1	1	LOCOMOTION
6_29_18_(31)_2.eaf	00:07:22.585000	FE	AMBIGUOUS FACE	1	1	0	1	1	1	1	1	1	JOHARI	1	1	AFFILIATIVE
6_29_18_(31)_2.eaf	00:07:22.585000	GE	EMBRACE	1	1	1	1	1	1	0	1	1	JOHARI	1	1	AFFILIATIVE
6_29_18_(31)_2.eaf	00:07:25.905000	GE	BITE	1	1	0	1	1	1	0	0	0	OLIVER	1	1	AFFILIATIVE
6_29_18_(31)_2.eaf	00:07:27.225000	GE	TANDEM WALK	1	1	1	1	0	1	0	1	1	OLIVER	1	1	AFFILIATIVE
6_29_18_(31)_2.eaf	00:10:20.745000	GE	PUSH	1	1	1	0	0	1	0	1	1	JOHARI	1	1	LOCOMOTION
6_29_18_(31)_2.eaf	00:10:28.385000	GE	AMB TOUCH	1	1	1	1	0	1	0	1	1	JOHARI	1	1	LOCOMOTION
6_29_18_(31)_2.eaf	00:13:32.300000	FE	PANT HOOT FACE	1	1	1	1	0	0	0	0	0	JEAN	1	0	AROUSAL (GENERAL)
6_29_18_(31)_2.eaf	00:14:00.894000	FE	LOWER LIP RELAXER FACE	1	1	0	1	0	1	0	1	1	JEAN	1	1	AFFILIATIVE
6_29_18_(31)_2.eaf	00:14:01.534000	GE	AMB TOUCH	1	1	0	1	1	1	0	0	0	JEAN	1	1	AFFILIATIVE
6_29_18_(31)_2.eaf	00:14:02.854000	GE	AMB TOUCH	1	1	1	1	0	1	0	0	0	JERRARD	1	1	AFFILIATIVE
6_29_18_(31)_2.eaf	00:15:18.618000	GE	AMB TOUCH	1	1	0	1	1	1	0	0	0	OLIVER	1	1	LOCOMOTION
6_29_18_(31)_2.eaf	00:20:46.357000	GE	AMB TOUCH	1	1	0	1	1	1	0	0	0	JOHARI	1	1	PLAY
6_29_18_(31)_2.eaf	00:20:47.237000	GE	SWING/ROCK	1	1	0	1	1	1	0	0	0	JOHARI	1	1	PLAY
6_29_18_(31)_2.eaf	00:20:59.472000	FE	PANT HOOT FACE	1	1	1	0	0	1	0	1	1	ZURI	0	0	AROUSAL (GENERAL)
6_29_18_(31)_2.eaf	00:21:02.972000	GE	CLAP	1	1	1	1	1	1	1	0	1	JERRARD	1	1	AGONISTIC
6_29_18_(31)_2.eaf	00:21:08.648000	FE	SCREAM FACE	1	1	1	1	1	0	0	0	0	REGINA	1	0	AFFILIATIVE
6_29_18_(31)_2.eaf	00:21:23.608000	FE	PANT HOOT FACE	1	1	0	1	0	0	0	0	0	REGINA	1	0	AFFILIATIVE
6_29_18_(31)_2.eaf	00:21:25.740000	FE	SCREAM FACE	1	1	1	1	1	1	0	1	1	REGINA	1	0	AFFILIATIVE
6_29_18_(31)_2.eaf	00:21:29.660000	GE	EMBRACE	1	1	1	1	1	1	0	0	0	OLIVER	1	0	AFFILIATIVE
6_29_18_(31)_2.eaf	00:21:29.860000	GE	EMBRACE	1	1	1	1	1	1	0	0	0	REGINA	1	0	AFFILIATIVE
6_29_18_(31)_2.eaf	00:21:57.720000	GE	REACH	1	1	1	1	1	1	0	1	1	JULIE	1	1	AFFILIATIVE
6_29_18_(31)_2.eaf	00:21:58.480000	GE	REACH	1	1	1	1	1	1	0	1	1	REGINA	1	1	AFFILIATIVE
6_29_18_(31)_2.eaf	00:22:01.900000	FE	SCREAM FACE	1	1	1	1	1	1	0	1	1	REGINA	1	0	AFFILIATIVE
6_29_18_(31)_2.eaf	00:22:03.652000	GE	AMB TOUCH	1	1	1	1	1	1	0	0	0	OLIVER	1	0	AFFILIATIVE
6_29_18_(31)_2.eaf	00:22:50.390000	FE	PANT HOOT FACE	1	1	1	0	1	0	0	0	0	REGINA	1	0	AROUSAL (GENERAL)
6_29_18_(31)_2.eaf	00:24:31.220000	FE	PANT HOOT FACE	1	1	1	1	0	0	0	0	0	JERRARD	1	0	AROUSAL (GENERAL)
6_29_18_(31)_2.eaf	00:24:40.776000	FE	PANT HOOT FACE	1	1	1	0	0	0	0	0	0	JEAN	1	0	AROUSAL (GENERAL)
6_29_18_(31)_2.eaf	00:26:13.299000	GE	CLAP	1	1	0	1	1	1	1	0	1	OLIVER	1	1	AFFILIATIVE
6_29_18_(31)_2.eaf	00:26:13.481000	FE	PANT HOOT FACE	1	1	1	1	1	1	0	1	1	GLENN	1	1	AFFILIATIVE
6_29_18_(31)_2.eaf	00:26:17.027000	GE	AMB TOUCH	1	1	0	1	1	1	0	0	0	GLENN	1	1	AFFILIATIVE
6_29_18_(31)_2.eaf	00:26:17.905000	GE	BITE	0	1	1	1	0	1	0	0	0	GLENN	1	1	AFFILIATIVE
6_29_18_(31)_2.eaf	00:26:31.835000	FE	PANT HOOT FACE	1	1	1	1	0	0	0	1	1	JERRARD	1	0	AROUSAL (GENERAL)
6_29_18_(31)_2.eaf	00:26:40.835000	GE	AMB TOUCH	0	1	1	1	0	1	0	0	0	JERRARD	1	0	AROUSAL (GENERAL)
6_29_18_(31)_2.eaf	00:27:02.333000	GE	THROW OBJECT	1	1	0	1	0	1	0	0	0	GLENN	1	1	AGONISTIC
6_29_18_(31)_2.eaf	00:27:03.441000	FE	SCREAM FACE	1	1	1	1	0	1	0	1	1	JULIE	1	1	AGONISTIC
6_29_18_(31)_2.eaf	00:27:32.206000	FE	LOWER LIP RELAXER FACE	1	1	1	1	1	1	1	1	1	GLENN	1	1	AFFILIATIVE
6_29_18_(31)_2.eaf	00:27:33.933000	GE	AMB TOUCH	1	1	0	1	1	1	0	0	0	GLENN	1	1	AFFILIATIVE
6_29_18_(31)_2.eaf	00:27:34.933000	GE	PRESENT BODY PART	1	1	1	1	1	1	0	0	0	OLIVER	1	1	AFFILIATIVE
6_29_18_(31)_2.eaf	00:27:35.191000	GE	BITE	1	1	1	0	0	1	0	1	1	GLENN	1	1	AFFILIATIVE
6_29_18_(31)_2.eaf	00:27:51.872000	FE	PANT HOOT FACE	1	1	1	1	1	1	0	1	1	JERRARD	1	0	AROUSAL (GENERAL)
6_29_18_(31)_2.eaf	00:27:56.104000	GE	TAP/SLAP/KNOCK OBJECT	1	1	1	1	1	1	1	1	1	OLIVER	1	0	AROUSAL (GENERAL)
6_29_18_(31)_2.eaf	00:27:58.271000	GE	AMB TOUCH	0	1	1	1	0	1	0	0	0	JERRARD	1	0	AROUSAL (GENERAL)
6_29_18_(31)_2.eaf	00:28:08.075000	FE	SCREAM FACE	1	1	1	0	0	1	0	1	1	JERRARD	1	1	AGONISTIC
6_29_18_(31)_2.eaf	00:28:09.158000	GE	PUSH	1	1	1	1	0	1	1	1	1	JERRARD	1	1	AGONISTIC
6_29_18_(31)_2.eaf	00:28:09.593000	FE	SCREAM FACE	1	1	1	1	1	1	0	1	1	GLENN	1	1	AGONISTIC
6_29_18_(31)_2.eaf	00:28:22.015000	FE	SCREAM FACE	1	1	1	1	0	1	0	1	1	JULIE	1	0	AFFILIATIVE
6_29_18_(31)_2.eaf	00:28:24.607000	GE	PRESENT BODY PART	1	1	1	1	0	1	0	1	1	JULIE	1	0	AFFILIATIVE
6_29_18_(31)_2.eaf	00:28:26.320000	GE	HAND FLING	1	1	0	1	0	1	1	0	1	JULIE	1	0	AFFILIATIVE
6_29_18_(31)_2.eaf	00:28:28.848000	GE	TANDEM WALK	1	1	1	0	0	1	0	1	1	JULIE	1	0	AFFILIATIVE
6_29_18_(31)_2.eaf	00:28:38.364000	FE	SCREAM FACE	1	1	1	1	0	1	0	1	1	JULIE	1	1	AGONISTIC
6_29_18_(31)_2.eaf	00:28:38.455000	FE	SCREAM FACE	1	1	1	1	0	1	0	1	1	JERRARD	1	1	AGONISTIC
6_29_18_(31)_2.eaf	00:28:52	GE	SLAP OTHER	1	1	0	1	1	1	0	0	0	SHAUN	1	1	AGONISTIC
6_29_18_(31)_2.eaf	00:28:52.061000	FE	SCREAM FACE	1	1	1	1	0	0	0	0	0	SHAUN	1	1	AGONISTIC
6_29_18_(31)_2.eaf	00:29:09.029000	GE	EMBRACE	1	1	1	1	1	1	0	1	1	OLIVER	1	1	AFFILIATIVE
6_29_18_(31)_2.eaf	00:29:54.696000	FE	SCREAM FACE	1	1	1	1	1	1	0	0	0	JULIE	1	1	AGONISTIC
6_29_18_(31)_2.eaf	00:29:55.196000	GE	SLAP OTHER	1	1	0	1	1	1	0	0	0	SHAUN	1	1	AGONISTIC
6_29_18_(31)_2.eaf	00:30:06.083000	GE	TAP/SLAP/KNOCK OBJECT	1	1	1	0	0	1	0	1	1	OLIVER	1	1	AGONISTIC
6_29_18_(31)_2.eaf	00:30:28.043000	FE	SCREAM FACE	1	1	1	1	1	1	0	1	1	JULIE	1	1	AGONISTIC
6_29_18_(31)_2.eaf	00:30:28.573000	GE	SWING/ROCK	1	1	1	1	1	1	0	1	1	SHAUN	1	1	AGONISTIC
6_29_18_(31)_2.eaf	00:30:37.553000	GE	JUMP	1	0	0	1	1	1	0	0	0	SHAUN	1	1	AGONISTIC
6_29_18_(31)_2.eaf	00:31:00.136000	GE	SWING/ROCK	1	1	1	1	1	1	1	1	1	GLENN	1	1	AGONISTIC
6_29_18_(31)_2.eaf	00:31:00.259000	FE	SCREAM FACE	1	1	1	1	0	1	0	1	1	JULIE	1	1	AGONISTIC
6_29_18_(31)_2.eaf	00:31:06.912000	GE	TAP/SLAP/KNOCK OBJECT	1	1	0	1	0	1	0	0	0	GLENN	1	1	AGONISTIC
6_29_18_(31)_2.eaf	00:31:53.035000	FE	PANT HOOT FACE	1	1	1	1	1	1	0	1	1	OLIVER	1	0	AROUSAL (GENERAL)
6_29_18_(31)_2.eaf	00:32:55.152000	FE	SCREAM FACE	1	1	1	1	0	0	0	0	0	YOSHI	1	0	AROUSAL (GENERAL)
6_29_18_(31)_2.eaf	00:33:48.522000	GE	AMB TOUCH	1	1	1	1	1	1	1	1	1	JERRARD	1	0	AROUSAL (GENERAL)
6_29_18_(31)_2.eaf	00:33:54.665000	GE	AMB TOUCH	1	1	1	0	0	1	0	1	1	JOHARI	1	0	AROUSAL (GENERAL)
6_29_18_(31)_2.eaf	00:33:57.642000	GE	AMB TOUCH	1	1	1	1	0	1	0	0	0	JOHARI	1	0	AROUSAL (GENERAL)
6_29_18_(31)_2.eaf	00:34:08.808000	GE	AMB TOUCH	1	1	0	1	1	1	1	1	1	OLIVER	1	0	AROUSAL (GENERAL)
6_29_18_(31)_2.eaf	00:34:43.596000	GE	EMBRACE	1	1	1	1	1	1	1	1	1	OLIVER	1	0	AROUSAL (GENERAL)
6_29_18_(31)_2.eaf	00:34:50.047000	GE	HAND FLING	1	1	1	1	1	1	1	0	1	GLENN	1	0	AROUSAL (GENERAL)
6_29_18_(31)_2.eaf	00:34:56.380000	GE	SWING/ROCK	1	1	1	1	0	1	0	1	1	SHAUN	1	0	AROUSAL (GENERAL)
6_29_18_(31)_2.eaf	00:35:10.095000	GE	SWING/ROCK	1	1	1	1	0	1	0	1	1	GLENN	1	0	AROUSAL (GENERAL)
6_29_18_(31)_2.eaf	00:37:20.395000	FE	SCREAM FACE	1	1	1	1	1	1	0	1	1	GRACIE	1	1	AFFILIATIVE
6_29_18_(31)_2.eaf	00:37:23.871000	GE	EMBRACE	1	1	1	1	1	1	0	0	0	GRACIE	1	1	AFFILIATIVE
6_29_18_(31)_2.eaf	00:37:24.395000	GE	EMBRACE	1	1	1	1	1	1	0	0	0	OLIVER	1	1	AFFILIATIVE
6_29_18_(31)_2.eaf	00:37:30.300000	GE	EMBRACE	1	1	1	1	1	1	1	0	1	GRACIE	1	1	AFFILIATIVE
6_29_18_(31)_2.eaf	00:37:34.062000	GE	PRESENT SEXUAL	1	1	1	1	1	1	1	1	1	GRACIE	1	1	AFFILIATIVE
6_29_18_(31)_2.eaf	00:37:39.728000	GE	PRESENT SEXUAL	1	1	1	1	1	1	0	0	0	GRACIE	1	1	AFFILIATIVE
6_29_18_(31)_2.eaf	00:39:55.875000	GE	REACH	1	1	1	1	1	1	0	1	1	GLENN	1	1	AFFILIATIVE
6_29_18_(31)_2.eaf	00:39:57.453000	GE	AMB TOUCH	1	1	0	1	1	1	0	0	0	GLENN	1	1	AFFILIATIVE
6_29_18_(31)_2.eaf	00:40:35.415000	GE	LOOK	1	1	1	1	1	1	0	1	1	ZURI	0	1	FOOD
6_29_18_(31)_2.eaf	00:41:45.785000	GE	SWING/ROCK	1	1	0	1	1	1	0	1	1	GLENN	1	1	AFFILIATIVE
6_29_18_(31)_2.eaf	00:41:48.336000	GE	AMB TOUCH	1	1	0	1	1	1	1	0	1	GLENN	1	1	AFFILIATIVE
6_29_18_(31)_2.eaf	00:44:13.833000	GE	LOOK	0	1	1	0	0	1	0	1	1	YOSHI	0	1	FOOD
6_29_18_(31)_2.eaf	00:45:27.600000	GE	SLAP OTHER	1	1	1	1	0	1	1	1	1	OLIVER	1	1	PLAY
6_29_18_(31)_2.eaf	00:45:35.920000	FE	PLAY FACE	1	1	1	1	1	1	0	0	0	GLENN	1	1	PLAY
6_29_18_(31)_2.eaf	00:45:44.500000	GE	SLAP OTHER	1	1	1	1	1	1	0	1	1	OLIVER	1	1	PLAY
6_29_18_(31)_2.eaf	00:46:01.569000	GE	BITE	1	1	1	1	0	1	1	1	1	JULIE	1	1	PLAY
6_29_18_(31)_2.eaf	00:46:05.409000	GE	SLAP OTHER	1	1	1	1	0	1	0	1	1	OLIVER	1	1	PLAY
6_29_18_(31)_2.eaf	00:46:10.729000	FE	PLAY FACE	1	1	1	1	0	1	0	1	1	GLENN	1	1	PLAY
6_29_18_(31)_2.eaf	00:46:17.669000	GE	AMB TOUCH	1	1	0	1	1	1	0	0	0	OLIVER	1	1	AFFILIATIVE
6_29_18_(31)_2.eaf	00:46:19.209000	GE	BITE	1	1	0	1	0	1	0	1	1	NAN	1	1	AFFILIATIVE
6_29_18_(31)_2.eaf	00:46:21.229000	GE	EMBRACE	0	1	1	0	0	1	0	0	0	OLIVER	1	1	AFFILIATIVE
6_29_18_(4)_2.eaf	00:00:45.284000	GE	ARM RAISE	1	1	1	1	1	1	1	1	1	YOSHI	1	1	AFFILIATIVE
6_29_18_(4)_2.eaf	00:00:46.893000	FE	LOWER LIP RELAXER FACE	1	1	1	1	1	1	0	1	1	YOSHI	1	1	AFFILIATIVE
6_29_18_(4)_2.eaf	00:00:48.040000	GE	AMB TOUCH	1	1	0	1	1	1	0	0	0	JERRARD	1	1	AFFILIATIVE
6_29_18_(4)_2.eaf	00:01:30.336000	FE	LOWER LIP RELAXER FACE	1	1	1	0	0	1	1	1	1	GLENN	1	1	GROOM
6_29_18_(4)_2.eaf	00:01:31.128000	GE	AMB TOUCH	1	1	1	1	0	1	1	1	1	GLENN	1	1	GROOM
6_29_18_(4)_2.eaf	00:03:34.609000	FE	LIPSMACKING FACE	1	1	1	1	1	1	0	1	1	GLENN	1	1	GROOM
6_29_18_(5)_2.eaf	00:00:34.219000	FE	PLAY FACE	1	1	1	1	1	1	1	1	1	OLIVER	1	1	PLAY
6_29_18_(5)_2.eaf	00:00:34.512000	GE	SLAP OTHER WITH OBJECT	1	1	1	1	1	1	1	1	1	OLIVER	1	1	PLAY
6_29_18_(5)_2.eaf	00:00:39.585000	FE	PLAY FACE	1	1	1	1	1	1	0	1	1	UKI	1	1	PLAY
6_29_18_(5)_2.eaf	00:00:45.023000	GE	OBJECT MOVE	1	1	0	1	1	0	0	1	1	KIMA	1	1	PLAY
6_29_18_(5)_2.eaf	00:00:45.999000	FE	PANT HOOT FACE	0	1	0	1	0	1	1	1	1	UKI	1	1	PLAY
6_29_18_(5)_2.eaf	00:00:50.999000	GE	CLAP	1	1	1	1	0	1	1	1	1	OLIVER	1	1	PLAY
6_29_18_(5)_2.eaf	00:00:51.633000	FE	PLAY FACE	1	1	1	1	0	1	1	1	1	OLIVER	1	1	PLAY
6_29_18_(5)_2.eaf	00:00:52.438000	GE	THROW OBJECT	1	1	1	1	1	0	1	0	1	KIMA	1	1	PLAY
6_29_18_(5)_2.eaf	00:00:54.584000	FE	RASPBERRY FACE	1	1	1	1	1	1	1	1	1	SHAUN	1	1	PLAY
6_29_18_(5)_2.eaf	00:00:56.609000	GE	THROW OBJECT	1	1	0	1	1	1	1	1	1	KIMA	1	1	PLAY
6_29_18_(5)_2.eaf	00:01:22.072000	GE	PUSH	1	1	1	1	1	1	0	1	1	OLIVER	1	1	LOCOMOTION
6_29_18_(8)_2.eaf	00:00:39.462000	GE	PUSH	1	1	1	1	0	1	0	1	1	JOHARI	1	1	LOCOMOTION
6_29_18_(8)_2.eaf	00:00:44.536000	GE	AMB TOUCH	1	1	1	1	1	1	0	1	1	ZOE	1	1	LOCOMOTION
6_29_18_(8)_2.eaf	00:01:43.658000	GE	AMB TOUCH	1	1	0	1	1	1	0	0	0	JOHARI	1	1	LOCOMOTION
6_29_18_(8)_2.eaf	00:01:45.316000	GE	AMB TOUCH	1	1	0	1	0	1	0	1	1	JOHARI	1	1	LOCOMOTION
6_7_17 JOHARI (A)_2.eaf	00:03:40.269000	GE	AMB TOUCH	1	1	1	1	0	1	0	1	1	JOHARI	1	1	LOCOMOTION
6_7_17 JOHARI (A)_2.eaf	00:11:20.675000	GE	ROLL OVER	1	1	1	1	1	1	0	1	1	JOHARI	1	1	GROOM
6_7_17 JOHARI (A)_2.eaf	00:11:58.837000	FE	LIPSMACKING FACE	1	1	1	0	0	1	0	0	0	SHAUN	1	1	GROOM
6_7_17 JOHARI (A)_2.eaf	00:13:32.782000	FE	LIPSMACKING FACE	1	1	1	1	0	1	0	0	0	SHAUN	1	0	GROOM
6_7_17 JOHARI (A)_2.eaf	00:14:26.080000	GE	ROLL OVER	0	1	1	1	0	1	0	1	1	JOHARI	1	1	GROOM
6_7_17 JOHARI (A)_2.eaf	00:15:07.134000	FE	LIPSMACKING FACE	0	1	1	1	0	1	0	0	0	SHAUN	1	1	GROOM
6_7_17 JOHARI (A)_2.eaf	00:15:49.188000	FE	LIPSMACKING FACE	0	1	1	1	0	1	0	0	0	SHAUN	1	1	GROOM
6_7_17 JOHARI (A)_2.eaf	00:15:56.999000	FE	LIPSMACKING FACE	0	1	1	0	0	1	0	0	0	SHAUN	1	1	GROOM
6_7_17 JOHARI (A)_2.eaf	00:18:41.975000	GE	AMB TOUCH	1	1	1	1	0	1	0	0	0	JOHARI	1	1	LOCOMOTION
6_7_17 JOHARI (B)_2.eaf	00:02:12.529000	GE	AMB TOUCH	1	1	1	1	0	1	1	1	1	JEAN	1	1	LOCOMOTION
6_7_17 ZOE (C).eaf	00:01:10.111000	GE	AMB TOUCH	1	1	1	1	0	1	0	1	1	JOHARI	1	1	LOCOMOTION
6_7_17 ZOE (C).eaf	00:05:54.074000	GE	AMB TOUCH	1	1	1	1	1	1	0	1	1	BEN	1	1	LOCOMOTION
6_7_17 ZOE (C).eaf	00:06:52.226000	GE	AMB TOUCH	1	1	1	1	0	1	0	1	1	JOHARI	1	1	LOCOMOTION
6_7_17 ZOE (C).eaf	00:07:25.369000	GE	PUSH	1	1	1	1	0	1	0	1	1	JOHARI	1	1	LOCOMOTION
6_7_17 ZOE (C).eaf	00:16:31.134000	GE	LOOK	1	1	1	1	0	1	0	1	1	UKI	0	1	FOOD
6_7_17 ZOE (C).eaf	00:17:53.739000	GE	AMB TOUCH	0	1	1	1	1	1	0	1	1	GLENN	1	1	AFFILIATIVE
6_7_17 ZURI (A).eaf	00:05:36.675000	GE	PUSH	1	1	1	1	1	1	1	1	1	JAKE	1	1	LOCOMOTION
7_11_18_(1)_2.eaf	00:00:30.859000	FE	AMBIGUOUS FACE	1	1	1	1	0	1	0	1	1	KIMA	0	1	FOOD
7_11_18_(1)_2.eaf	00:00:31.859000	GE	LOOK	1	1	1	1	1	1	0	1	1	KIMA	0	1	FOOD
7_11_18_(1)_2.eaf	00:01:33.780000	GE	LOOK	0	1	1	0	1	1	0	1	1	OLIVER	0	1	FOOD
7_11_18_(10)_2.eaf	00:00:13.695000	GE	AMB TOUCH	1	1	0	1	0	1	1	0	1	JULIE	1	1	LOCOMOTION
7_11_18_(11)_2.eaf	00:01:54.902000	FE	PLAY FACE	1	1	1	0	1	1	0	1	1	OLIVER	1	1	PLAY
7_11_18_(11)_2.eaf	00:01:55.170000	GE	AMB TOUCH	1	1	1	1	1	1	0	1	1	OLIVER	1	1	PLAY
7_11_18_(11)_2.eaf	00:01:56.682000	GE	AMB TOUCH	1	1	1	1	0	1	0	1	1	GRACIE	1	1	PLAY
7_11_18_(13)_2.eaf	00:00:17.877000	GE	BITE	1	1	0	1	0	1	1	0	1	GRACIE	1	1	FOOD
7_11_18_(14)_2.eaf	00:00:05.878000	GE	HAND FLING	1	1	0	1	1	1	0	0	0	GLENN	1	1	LOCOMOTION
7_11_18_(14)_2.eaf	00:01:05.389000	FE	LIPSMACKING FACE	1	1	1	0	1	1	0	0	0	JAKE	1	1	GROOM
7_11_18_(14)_2.eaf	00:02:03.486000	FE	AMBIGUOUS FACE	1	1	1	0	0	0	1	1	1	BEN	0	0	AGONISTIC
7_11_18_(14)_2.eaf	00:02:05.951000	GE	SWING/ROCK	1	1	1	0	0	0	1	1	1	BEN	0	0	AGONISTIC
7_11_18_(14)_2.eaf	00:03:07.999000	FE	LIPSMACKING FACE	1	1	1	0	0	1	0	0	0	JAKE	1	1	GROOM
7_11_18_(15)_2.eaf	00:00:03.048000	GE	OBJECT MOVE	1	1	0	1	1	1	0	1	1	GLENN	1	1	AGONISTIC
7_11_18_(15)_2.eaf	00:00:05.756000	GE	SWING/ROCK	1	1	1	1	1	1	0	1	1	GLENN	1	1	AGONISTIC
7_11_18_(15)_2.eaf	00:01:19.316000	GE	SWING/ROCK	1	1	1	1	0	0	0	0	0	SHAUN	1	0	AGONISTIC
7_11_18_(15)_2.eaf	00:01:35.389000	FE	SCREAM FACE	1	1	1	1	0	0	0	0	0	SHAUN	1	0	AGONISTIC
7_11_18_(16)_2.eaf	00:00:14.894000	FE	PANT HOOT FACE	1	1	1	0	0	0	0	0	0	BEN	0	0	AGONISTIC
7_11_18_(16)_2.eaf	00:00:41.414000	GE	TAP/SLAP/KNOCK OBJECT	1	1	0	1	0	0	0	0	0	BEN	0	0	AGONISTIC
7_11_18_(18)_2.eaf	00:00:19.511000	GE	LOOK	0	1	1	1	1	1	0	1	1	JOHARI	0	1	FOOD
7_11_18_(18)_2.eaf	00:00:24.779000	GE	OBJECT MOVE	1	1	0	0	1	1	0	0	0	JULIE	0	1	FOOD
7_11_18_(19)_2.eaf	00:00:16.487000	GE	TAP/SLAP/KNOCK OBJECT	1	1	1	1	1	1	0	1	1	OLIVER	1	1	PLAY
7_11_18_(19)_2.eaf	00:00:22.561000	GE	DANGLE	1	1	1	1	1	1	0	1	1	OLIVER	1	1	PLAY
7_11_18_(19)_2.eaf	00:00:22.853000	GE	AMB TOUCH	1	1	1	0	1	1	0	1	1	GLENN	1	1	PLAY
7_11_18_(19)_2.eaf	00:00:37.707000	GE	AMB TOUCH	1	1	1	0	1	1	0	1	1	OLIVER	1	1	PLAY
7_11_18_(19)_2.eaf	00:01:10.942000	GE	AMB TOUCH	1	1	1	1	1	1	0	1	1	GLENN	1	1	PLAY
7_11_18_(19)_2.eaf	00:01:11.059000	FE	PLAY FACE	1	1	1	1	1	1	0	1	1	GLENN	1	1	PLAY
7_11_18_(2)_2.eaf	00:00:02.357000	FE	LIPSMACKING FACE	1	1	1	1	0	1	0	1	1	SHAUN	1	1	GROOM
7_11_18_(2)_2.eaf	00:00:02.414000	FE	LIPSMACKING FACE	1	1	1	1	1	1	0	0	0	JAKE	1	1	GROOM
7_11_18_(2)_2.eaf	00:00:41.861000	FE	LIPSMACKING FACE	1	1	1	1	1	1	0	0	0	SHAUN	1	1	GROOM
7_11_18_(2)_2.eaf	00:00:44.276000	FE	LIPSMACKING FACE	1	1	1	1	1	1	0	0	0	JAKE	1	1	GROOM
7_11_18_(2)_2.eaf	00:03:54.075000	FE	LIPSMACKING FACE	1	1	1	1	0	1	0	0	0	JAKE	1	1	GROOM
7_11_18_(2)_2.eaf	00:08:06.076000	FE	LIPSMACKING FACE	1	1	1	0	0	1	0	0	0	SHAUN	1	1	GROOM
7_11_18_(20)_2.eaf	00:00:52.341000	GE	LOOK	0	1	1	1	0	1	0	1	1	OLIVER	0	0	GROOM
7_11_18_(21)_2.eaf	00:01:37.484000	GE	PUSH	1	1	1	1	0	1	1	1	1	JOHARI	1	1	LOCOMOTION
7_11_18_(21)_2.eaf	00:01:49.777000	GE	PUSH	1	1	1	0	0	1	1	1	1	JOHARI	1	1	LOCOMOTION
7_11_18_(21)_2.eaf	00:02:05.389000	GE	PUSH	1	1	1	1	0	1	0	1	1	JOHARI	1	1	LOCOMOTION
7_11_18_(21)_2.eaf	00:02:05.950000	FE	POUT FACE	1	1	1	1	0	1	0	1	1	JOHARI	1	1	LOCOMOTION
7_11_18_(7)_2.eaf	00:00:03.268000	GE	ARM RAISE	1	1	0	1	0	1	0	1	1	OLIVER	1	1	PLAY
7_11_18_(7)_2.eaf	00:00:03.390000	FE	PLAY FACE	1	1	1	1	1	1	0	1	1	SHAUN	1	1	PLAY
7_11_18_(7)_2.eaf	00:00:03.804000	FE	PLAY FACE	1	1	1	1	1	1	0	1	1	OLIVER	1	1	PLAY
7_11_18_(7)_2.eaf	00:00:04.487000	GE	ROLL OVER	1	1	0	1	1	1	1	1	1	OLIVER	1	1	PLAY
7_11_18_(8)_2.eaf	00:00:04.780000	GE	PRESENT SEXUAL	1	1	1	1	1	1	0	1	1	GRACIE	1	1	SEX
7_11_18_(8)_2.eaf	00:00:35.365000	GE	AMB TOUCH	1	1	1	0	1	1	0	0	0	SHAUN	1	1	GROOM
7_11_18_(8)_2.eaf	00:00:36.291000	FE	LIPSMACKING FACE	1	1	1	1	1	1	0	0	0	SHAUN	1	1	GROOM
7_11_18_(8)_2.eaf	00:00:47.438000	FE	BARED TEETH FACE	1	1	1	1	0	0	0	0	0	REGINA	0	0	LOCOMOTION
7_11_19 (3).eaf	00:00:01.891000	FE	PANT HOOT FACE	0	1	1	1	0	0	0	0	0	GLENN	1	0	AROUSAL (GENERAL)
7_11_19 (3).eaf	00:00:02.351000	FE	PANT HOOT FACE	1	1	1	1	0	0	0	0	0	SHAUN	1	0	AROUSAL (GENERAL)
7_11_19 (3).eaf	00:00:02.837000	FE	PANT HOOT FACE	1	1	1	1	0	0	0	0	0	NAN	1	0	AROUSAL (GENERAL)
7_11_19 (3).eaf	00:00:04.459000	GE	SWING/ROCK	1	1	1	1	1	1	0	1	1	GLENN	1	0	AROUSAL (GENERAL)
7_11_19 (3).eaf	00:00:06.135000	FE	BARED TEETH FACE	1	1	1	1	1	1	1	1	1	YOSHI	1	0	AROUSAL (GENERAL)
7_11_19 (3).eaf	00:00:07.621000	GE	REACH	1	1	1	1	1	1	0	1	1	YOSHI	1	0	AROUSAL (GENERAL)
7_12_18_(1)_2.eaf	00:00:06.231000	GE	LOOK	1	1	1	1	0	1	0	1	1	OLIVER	0	1	FOOD
7_12_18_(1)_2.eaf	00:00:07.158000	FE	LOWER LIP RELAXER FACE	1	1	1	1	0	1	0	1	1	OLIVER	0	1	FOOD
7_12_18_(11)_2.eaf	00:01:51.525000	GE	AMB TOUCH	1	1	0	1	0	1	1	0	1	JOHARI	1	1	LOCOMOTION
7_12_18_(11)_2.eaf	00:01:56.525000	GE	PUSH	1	1	0	1	0	1	0	0	0	JOHARI	1	1	LOCOMOTION
7_12_18_(11)_2.eaf	00:01:59.926000	GE	AMB TOUCH	1	1	1	1	1	1	0	1	1	ZOE	1	1	LOCOMOTION
7_12_18_(12)_2.eaf	00:02:16.097000	GE	REACH	1	1	1	1	0	0	0	1	1	JEAN	1	1	PLAY
7_12_18_(12)_2.eaf	00:02:19.951000	FE	PLAY FACE	1	1	1	1	0	0	0	1	1	JEAN	1	1	PLAY
7_12_18_(12)_2.eaf	00:02:25.804000	GE	SLAP OTHER	1	1	1	1	1	1	0	1	1	JOHARI	1	1	PLAY
7_12_18_(12)_2.eaf	00:02:26.999000	GE	PRESENT BODY PART	1	1	1	1	0	1	0	1	1	OLIVER	1	1	PLAY
7_12_18_(12)_2.eaf	00:02:40.341000	GE	REACH	1	1	1	1	1	1	0	1	1	JEAN	1	1	PLAY
7_12_18_(12)_2.eaf	00:02:48.780000	GE	SWING/ROCK	1	1	1	0	0	1	0	1	1	JEAN	1	1	PLAY
7_12_18_(12)_2.eaf	00:03:37.243000	GE	SLAP OTHER	1	1	1	1	1	1	1	1	1	OLIVER	1	1	PLAY
7_12_18_(12)_2.eaf	00:03:38.199000	FE	PLAY FACE	1	1	1	1	1	1	0	1	1	OLIVER	1	1	PLAY
7_12_18_(12)_2.eaf	00:03:38.954000	GE	SLAP OTHER	1	1	1	1	1	1	1	1	1	JOHARI	1	1	PLAY
7_12_18_(12)_2.eaf	00:03:42.110000	FE	PLAY FACE	1	1	1	0	0	0	0	1	1	JEAN	1	1	PLAY
7_12_18_(12)_2.eaf	00:03:46.121000	GE	PRESENT BODY PART	1	1	1	1	0	0	1	1	1	JEAN	1	1	PLAY
7_12_18_(12)_2.eaf	00:03:46.243000	GE	SLAP OTHER	0	1	1	1	1	1	0	1	1	JOHARI	1	1	PLAY
7_12_18_(12)_2.eaf	00:04:38.977000	GE	OBJECT MOVE	1	1	1	1	1	1	1	1	1	JEAN	1	1	PLAY
7_12_18_(12)_2.eaf	00:05:07.555000	GE	AMB TOUCH	0	1	1	1	1	1	0	1	1	OLIVER	1	1	PLAY
7_12_18_(12)_2.eaf	00:05:10.666000	GE	SLAP OTHER	1	1	1	1	0	1	1	1	1	JOHARI	1	1	PLAY
7_12_18_(12)_2.eaf	00:05:20.110000	FE	PLAY FACE	1	1	1	1	0	1	1	1	1	JOHARI	1	1	PLAY
7_12_18_(12)_2.eaf	00:05:28.110000	GE	SLAP OTHER	1	1	0	1	0	1	0	1	1	JOHARI	1	1	PLAY
7_12_18_(12)_2.eaf	00:11:15.515000	GE	AMB TOUCH	1	1	1	1	1	1	1	1	1	JOHARI	1	1	PLAY
7_12_18_(12)_2.eaf	00:11:35.923000	GE	AMB TOUCH	1	1	1	1	0	1	0	1	1	JOHARI	1	1	PLAY
7_12_18_(12)_2.eaf	00:11:41.908000	GE	PUSH	1	1	1	1	0	1	0	1	1	OLIVER	1	1	PLAY
7_12_18_(12)_2.eaf	00:15:22.960000	FE	PLAY FACE	1	1	1	0	1	1	0	1	1	JOHARI	1	1	PLAY
7_12_18_(12)_2.eaf	00:15:23.240000	GE	AMB TOUCH	1	1	1	1	1	1	0	1	1	JOHARI	1	1	PLAY
7_12_18_(12)_2.eaf	00:15:26.880000	GE	PUSH	1	1	1	1	0	1	0	1	1	OLIVER	1	1	PLAY
7_12_18_(13)_2.eaf	00:01:12.166000	GE	AMB TOUCH	1	1	1	1	0	1	0	1	1	OLIVER	1	1	LOCOMOTION
7_12_18_(13)_2.eaf	00:01:27.152000	FE	PANT HOOT FACE	1	1	1	1	0	0	1	1	1	JULIE	1	0	AROUSAL (GENERAL)
7_12_18_(13)_2.eaf	00:01:30.655000	GE	EMBRACE	1	1	1	1	0	1	0	0	0	JULIE	1	0	AROUSAL (GENERAL)
7_12_18_(13)_2.eaf	00:01:32.382000	GE	SWING/ROCK	1	1	1	0	0	1	0	0	0	JULIE	1	0	AROUSAL (GENERAL)
7_12_18_(13)_2.eaf	00:01:35.151000	FE	PANT HOOT FACE	1	1	1	1	0	1	1	1	1	NAN	1	0	AROUSAL (GENERAL)
7_12_18_(13)_2.eaf	00:01:43.612000	FE	PANT HOOT FACE	1	1	1	1	0	0	0	1	1	BEN	1	0	AROUSAL (GENERAL)
7_12_18_(13)_2.eaf	00:02:24.704000	GE	EMBRACE	1	1	1	1	1	1	0	0	0	JULIE	1	1	AFFILIATIVE
7_12_18_(13)_2.eaf	00:02:25.976000	GE	EMBRACE	1	1	1	1	0	1	0	0	0	JOHARI	1	1	AFFILIATIVE
7_12_18_(13)_2.eaf	00:02:28.067000	GE	SWING/ROCK	1	1	1	0	0	1	0	0	0	JULIE	1	1	AFFILIATIVE
7_12_18_(13)_2.eaf	00:02:29.249000	GE	EMBRACE	1	1	1	1	0	1	0	1	1	OLIVER	1	1	AFFILIATIVE
7_12_18_(13)_2.eaf	00:04:13.333000	GE	EMBRACE	1	1	1	1	0	1	0	0	0	JULIE	1	1	AFFILIATIVE
7_12_18_(13)_2.eaf	00:04:16.030000	GE	SWING/ROCK	1	1	1	0	0	1	0	0	0	JULIE	1	1	AFFILIATIVE
7_12_18_(14)_2.eaf	00:00:02.352000	GE	EMBRACE	1	1	1	1	1	1	0	0	0	JULIE	1	1	AFFILIATIVE
7_12_18_(14)_2.eaf	00:00:03.294000	GE	SWING/ROCK	1	1	1	0	0	1	0	0	0	JULIE	1	1	AFFILIATIVE
7_12_18_(17)_2.eaf	00:00:03.294000	FE	PANT HOOT FACE	1	1	1	0	1	1	0	1	1	JULIE	1	1	AGONISTIC
7_12_18_(17)_2.eaf	00:00:03.294000	GE	HAND FLING	1	1	1	0	1	1	1	1	1	JULIE	1	1	AGONISTIC
7_12_18_(17)_2.eaf	00:00:05.294000	GE	HAND FLING	1	1	0	1	1	1	1	0	1	JULIE	1	1	AGONISTIC
7_12_18_(17)_2.eaf	00:00:05.489000	GE	AMB TOUCH	1	1	0	1	0	1	0	1	1	OLIVER	1	1	AGONISTIC
7_12_18_(17)_2.eaf	00:00:06.959000	GE	ROLL OVER	1	1	1	0	0	0	0	0	0	ZURI	1	1	AGONISTIC
7_12_18_(17)_2.eaf	00:00:07.754000	FE	SCREAM FACE	1	1	1	0	0	0	0	0	0	ZURI	1	1	AGONISTIC
7_12_18_(17)_2.eaf	00:00:08.161000	GE	EMBRACE	1	1	1	1	1	1	0	0	0	JULIE	1	1	AGONISTIC
7_12_18_(17)_2.eaf	00:00:09.066000	GE	SWING/ROCK	1	1	1	0	0	1	0	0	0	JULIE	1	1	AGONISTIC
7_12_18_(17)_2.eaf	00:00:12.526000	GE	ROLL OVER	1	1	1	0	0	0	0	0	0	ZURI	1	1	AGONISTIC
7_12_18_(17)_2.eaf	00:00:23.857000	GE	ROLL OVER	1	1	1	1	0	0	0	0	0	ZURI	1	1	AGONISTIC
7_12_18_(17)_2.eaf	00:00:27.653000	GE	SLAP OTHER	1	1	1	1	1	1	0	0	0	OLIVER	1	1	AGONISTIC
7_12_18_(17)_2.eaf	00:00:35.306000	GE	REACH	1	1	1	0	0	1	0	1	1	ZURI	1	1	AGONISTIC
7_12_18_(17)_2.eaf	00:00:55.815000	GE	JUMP	1	1	1	0	1	1	0	1	1	OLIVER	1	1	AGONISTIC
7_12_18_(17)_2.eaf	00:00:56.305000	FE	SCREAM FACE	1	1	1	0	1	1	0	1	1	OLIVER	1	1	AGONISTIC
7_12_18_(17)_2.eaf	00:00:56.836000	GE	SLAP OTHER	1	1	1	1	1	1	0	1	1	OLIVER	1	1	AGONISTIC
7_12_18_(17)_2.eaf	00:00:58.427000	GE	PUSH	1	1	0	1	0	1	1	1	1	ZURI	1	1	AGONISTIC
7_12_18_(17)_2.eaf	00:01:03.754000	GE	REACH	0	1	0	1	0	1	0	0	0	ZURI	1	1	AGONISTIC
7_12_18_(17)_2.eaf	00:01:04.162000	GE	AMB TOUCH	1	1	0	1	1	1	1	1	1	JULIE	1	1	AGONISTIC
7_12_18_(17)_2.eaf	00:01:05.183000	GE	ROLL OVER	1	1	0	1	0	0	0	0	0	ZURI	1	1	AGONISTIC
7_12_18_(17)_2.eaf	00:01:09.550000	GE	TAP/SLAP/KNOCK OBJECT	1	1	1	0	1	1	0	1	1	OLIVER	1	1	AGONISTIC
7_12_18_(17)_2.eaf	00:01:11.285000	GE	CLAP	1	1	0	1	1	1	0	0	0	OLIVER	1	1	AGONISTIC
7_12_18_(17)_2.eaf	00:01:13.265000	GE	PRESENT BODY PART	1	1	1	1	1	1	0	1	1	JULIE	1	1	AGONISTIC
7_12_18_(17)_2.eaf	00:01:13.571000	GE	SLAP OTHER	1	1	0	1	1	1	1	0	1	ZURI	1	1	AGONISTIC
7_12_18_(17)_2.eaf	00:01:13.999000	FE	SCREAM FACE	1	1	1	1	1	1	0	1	1	JULIE	1	1	AGONISTIC
7_12_18_(17)_2.eaf	00:01:26.670000	FE	SCREAM FACE	1	1	1	1	1	1	0	1	1	ZURI	1	1	AGONISTIC
7_12_18_(17)_2.eaf	00:01:27.337000	FE	SCREAM FACE	1	1	1	1	1	1	0	1	1	OLIVER	1	1	AGONISTIC
7_12_18_(17)_2.eaf	00:01:57.999000	FE	PLAY FACE	1	1	1	1	1	1	0	1	1	ZURI	1	1	PLAY
7_12_18_(19)_2.eaf	00:00:08.054000	GE	EMBRACE	0	1	1	0	0	1	0	0	0	BEN	1	1	AFFILIATIVE
7_12_18_(2)_2.eaf	00:00:52.469000	GE	REACH	1	1	0	1	1	1	0	1	1	ZOE	1	1	LOCOMOTION
7_12_18_(2)_2.eaf	00:00:54.299000	GE	PRESENT CLIMB ON ME	0	1	0	1	1	1	0	1	1	ZOE	1	1	LOCOMOTION
7_12_18_(2)_2.eaf	00:01:25.371000	FE	PLAY FACE	1	1	1	1	1	1	1	1	1	OLIVER	1	1	PLAY
7_12_18_(2)_2.eaf	00:01:31.981000	GE	AMB TOUCH	1	1	1	1	0	1	0	1	1	OLIVER	1	1	PLAY
7_12_18_(2)_2.eaf	00:01:35.797000	FE	AMBIGUOUS FACE	1	1	0	1	1	1	0	0	0	ZOE	1	1	PLAY
7_12_18_(2)_2.eaf	00:01:37.151000	GE	ARM RAISE	1	1	1	1	1	1	0	1	1	JOHARI	1	1	PLAY
7_12_18_(2)_2.eaf	00:01:37.780000	FE	PLAY FACE	1	1	1	1	1	1	0	1	1	OLIVER	1	1	PLAY
7_12_18_(2)_2.eaf	00:01:37.877000	GE	AMB TOUCH	1	1	1	1	1	1	0	1	1	OLIVER	1	1	PLAY
7_12_18_(2)_2.eaf	00:01:44.610000	GE	AMB TOUCH	1	1	1	1	0	1	0	1	1	OLIVER	1	1	AFFILIATIVE
7_12_18_(2)_2.eaf	00:02:05.006000	FE	SCREAM FACE	1	1	1	1	1	1	0	1	1	JEAN	1	1	AFFILIATIVE
7_12_18_(2)_2.eaf	00:02:08.251000	GE	AMB TOUCH	1	1	1	1	1	1	1	1	1	GLENN	1	1	AFFILIATIVE
7_12_18_(2)_2.eaf	00:02:10.656000	GE	EMBRACE	1	1	1	1	1	1	0	0	0	GLENN	1	1	AFFILIATIVE
7_12_18_(2)_2.eaf	00:02:23.596000	FE	PLAY FACE	1	1	1	0	0	1	0	1	1	JEAN	1	1	PLAY
7_12_18_(2)_2.eaf	00:02:28.126000	GE	REACH	1	1	1	1	0	1	1	1	1	JEAN	1	1	PLAY
7_12_18_(2)_2.eaf	00:02:31.984000	FE	PLAY FACE	1	1	1	1	1	1	0	1	1	OLIVER	1	1	PLAY
7_12_18_(2)_2.eaf	00:02:42.968000	GE	AMB TOUCH	1	1	1	1	0	1	0	1	1	JEAN	1	1	PLAY
7_12_18_(2)_2.eaf	00:02:52.696000	FE	PLAY FACE	1	1	1	1	0	1	0	1	1	JEAN	1	1	PLAY
7_12_18_(2)_2.eaf	00:02:58.165000	GE	AMB TOUCH	1	1	1	1	1	1	1	1	1	JEAN	1	1	PLAY
7_12_18_(2)_2.eaf	00:03:13.529000	GE	AMB TOUCH	1	1	1	1	1	1	1	1	1	JEAN	1	1	PLAY
7_12_18_(2)_2.eaf	00:03:25.287000	GE	PUNCH OTHER	1	1	1	1	1	1	0	1	1	JEAN	1	1	PLAY
7_12_18_(2)_2.eaf	00:03:44.608000	GE	LOOK	0	1	1	0	0	1	0	1	1	OLIVER	0	1	FOOD
7_12_18_(2)_2.eaf	00:04:31.103000	GE	LOOK	1	1	1	0	0	1	0	1	1	OLIVER	0	1	FOOD
7_12_18_(2)_2.eaf	00:04:32.694000	FE	LOWER LIP RELAXER FACE	0	1	1	0	0	1	0	1	1	OLIVER	0	1	FOOD
7_12_18_(2)_2.eaf	00:04:56.832000	FE	PLAY FACE	1	1	1	1	1	1	0	0	0	OLIVER	1	1	PLAY
7_12_18_(2)_2.eaf	00:04:57.105000	GE	DANGLE	1	1	1	1	1	1	0	0	0	OLIVER	1	1	PLAY
7_12_18_(2)_2.eaf	00:05:01.438000	GE	AMB TOUCH	1	1	1	1	0	1	0	1	1	JEAN	1	1	PLAY
7_12_18_(2)_2.eaf	00:05:01.469000	FE	PLAY FACE	1	1	1	1	0	1	0	1	1	JEAN	1	1	PLAY
7_12_18_(2)_2.eaf	00:05:15.241000	GE	KICK	1	1	0	1	1	1	0	0	0	OLIVER	1	1	PLAY
7_12_18_(4)_2.eaf	00:00:25.717000	GE	PRESENT CLIMB ON ME	0	1	1	1	0	1	0	1	1	ZOE	1	1	LOCOMOTION
7_12_18_(8)_2.eaf	00:06:07.194000	GE	PRESENT BODY PART	1	1	1	1	1	1	0	1	1	OLIVER	1	1	AFFILIATIVE
7_12_18_(8)_2.eaf	00:06:09.657000	GE	BITE	1	1	1	1	1	1	0	0	0	REGINA	1	1	AFFILIATIVE
7_12_18_(8)_2.eaf	00:06:11.657000	GE	AMB TOUCH	1	1	1	1	1	1	0	1	1	OLIVER	1	1	AFFILIATIVE
7_12_18_(8)_2.eaf	00:06:57.169000	FE	PANT HOOT FACE	1	1	1	1	0	0	0	0	0	BEN	1	0	AGONISTIC
7_12_18_(8)_2.eaf	00:07:28.390000	FE	PANT HOOT FACE	1	1	1	1	0	0	0	0	0	BEN	1	0	AGONISTIC
7_12_18_(8)_2.eaf	00:09:43.706000	FE	PANT HOOT FACE	1	1	1	0	0	0	0	0	0	GLENN	0	0	AGONISTIC
7_12_18_(8)_2.eaf	00:09:44.682000	GE	SWING/ROCK	1	1	1	0	0	0	0	0	0	GLENN	0	0	AGONISTIC
7_12_18_(8)_2.eaf	00:09:49.194000	GE	TAP/SLAP/KNOCK OBJECT	1	1	0	0	0	0	0	0	0	GLENN	0	0	AGONISTIC
7_12_18_(8)_2.eaf	00:10:31.829000	FE	BARED TEETH FACE	1	1	1	0	0	1	0	0	0	REGINA	0	0	AGONISTIC
7_12_18_(8)_2.eaf	00:11:13.463000	GE	SWING/ROCK	1	1	1	1	0	0	0	0	0	SHAUN	1	0	AGONISTIC
7_12_18_(8)_2.eaf	00:11:27.316000	FE	PANT HOOT FACE	1	1	1	1	0	1	0	0	0	GLENN	1	0	AGONISTIC
7_12_18_(8)_2.eaf	00:11:28.975000	GE	TAP/SLAP/KNOCK OBJECT	1	1	0	1	0	1	0	0	0	GLENN	1	0	AGONISTIC
7_12_18_(8)_2.eaf	00:11:38.243000	GE	SWING/ROCK	1	1	1	1	0	1	0	0	0	GLENN	1	0	AGONISTIC
7_12_18_(8)_2.eaf	00:12:33.072000	GE	SLAP OTHER WITH OBJECT	0	1	1	1	1	1	0	1	1	GLENN	1	1	AGONISTIC
7_12_18_(8)_2.eaf	00:13:43.487000	GE	SWING/ROCK	1	1	1	0	0	0	0	0	0	GLENN	1	1	AGONISTIC
7_12_18_(8)_2.eaf	00:13:47.438000	GE	TAP/SLAP/KNOCK OBJECT	1	1	1	1	0	0	0	0	0	GLENN	1	1	AGONISTIC
7_16_19 (2).eaf	00:00:04.378000	GE	BITE	1	1	1	1	1	1	1	1	1	JULIE	1	1	LOCOMOTION
7_16_19 (2).eaf	00:00:10.081000	GE	AMB TOUCH	1	1	0	1	0	1	0	1	1	JULIE	1	1	LOCOMOTION
7_16_19 (2).eaf	00:00:20.432000	GE	DANGLE	1	1	1	1	1	1	1	1	1	UKI	1	1	PLAY
7_16_19 (3).eaf	00:00:05.999000	GE	AMB TOUCH	1	1	1	1	1	1	1	1	1	UKI	1	1	GROOM
7_16_19 (3).eaf	00:00:24.675000	GE	PUSH	1	1	1	1	0	1	0	1	1	ZURI	1	1	GROOM
7_16_19 (3).eaf	00:00:27.675000	GE	PRESENT BODY PART	1	1	1	1	1	1	0	1	1	UKI	1	1	GROOM
7_16_19 (3).eaf	00:00:28.296000	GE	AMB TOUCH	1	1	1	1	0	1	0	1	1	ZURI	1	1	GROOM
7_16_19 (4).eaf	00:00:14.459000	GE	PUSH	1	1	1	1	1	1	0	1	1	JULIE	1	1	LOCOMOTION
7_16_19 (4).eaf	00:00:19.270000	GE	ROLL OVER	1	1	1	0	1	1	1	1	1	ZURI	0	1	PLAY
7_16_19 (4).eaf	00:00:21.918000	GE	REACH	1	1	0	0	0	1	1	0	1	ZURI	0	1	PLAY
7_16_19 (4).eaf	00:00:25.378000	GE	AMB TOUCH	1	1	0	0	0	1	1	1	1	ZURI	0	1	PLAY
7_16_19 (4).eaf	00:00:29.107000	GE	AMB TOUCH	1	1	1	0	0	1	0	1	1	UKI	0	1	PLAY
7_16_19 (4).eaf	00:00:31.107000	FE	PLAY FACE	1	1	1	0	0	1	0	1	1	ZURI	0	1	PLAY
7_16_19 (4).eaf	00:00:45.188000	GE	PUSH	1	1	1	1	0	1	0	1	1	UKI	0	1	PLAY
7_16_19 (4).eaf	00:01:21.459000	GE	AMB TOUCH	1	1	1	1	1	1	0	1	1	UKI	1	1	PLAY
7_16_19 (4).eaf	00:02:39.512000	GE	PRESENT CLIMB ON ME	1	1	1	1	1	1	0	1	1	UKI	1	1	LOCOMOTION
7_16_19 (4).eaf	00:03:07.323000	GE	PRESENT CLIMB ON ME	1	1	1	1	1	1	0	1	1	UKI	1	1	LOCOMOTION
7_16_19 (6).eaf	00:00:03.432000	GE	AMB TOUCH	1	1	1	1	0	1	0	1	1	JULIE	1	1	PLAY
7_16_19 (6).eaf	00:02:19.837000	GE	PRESENT CLIMB ON ME	1	1	0	1	1	1	0	1	1	UKI	1	1	LOCOMOTION
7_17_19 (10).eaf	00:00:00.324000	FE	PANT HOOT FACE	1	1	1	1	0	0	0	0	0	GLENN	1	0	AROUSAL (GENERAL)
7_17_19 (10).eaf	00:00:03.837000	FE	PANT HOOT FACE	1	1	1	1	0	0	0	0	0	OLIVER	1	0	AROUSAL (GENERAL)
7_17_19 (10).eaf	00:00:07.216000	GE	TAP/SLAP/KNOCK OBJECT	1	1	1	1	1	1	0	0	0	OLIVER	1	0	AROUSAL (GENERAL)
7_17_19 (10).eaf	00:00:08.297000	GE	AMB TOUCH	1	1	0	1	1	1	0	0	0	JERRARD	1	0	AROUSAL (GENERAL)
7_17_19 (10).eaf	00:00:12.648000	FE	PANT HOOT FACE	1	1	0	0	1	1	0	1	1	JULIE	1	1	AGONISTIC
7_17_19 (10).eaf	00:00:13	GE	HAND FLING	1	1	0	1	1	1	0	0	0	JULIE	1	1	AGONISTIC
7_17_19 (11).eaf	00:00:06.135000	FE	PANT HOOT FACE	1	1	1	0	1	1	0	1	1	JEAN	1	0	AROUSAL (GENERAL)
7_17_19 (12).eaf	00:00:02	FE	PANT HOOT FACE	1	1	1	0	0	0	0	0	0	REGINA	0	0	AROUSAL (GENERAL)
7_17_19 (3).eaf	00:00:23.903000	GE	BITE	0	1	1	1	1	1	1	1	1	JULIE	1	1	AFFILIATIVE
7_17_19 (3).eaf	00:00:25.010000	GE	BITE	0	1	1	0	1	1	0	0	0	SHAUN	1	1	AFFILIATIVE
7_17_19 (9).eaf	00:00:00.135000	FE	PANT HOOT FACE	1	1	1	0	0	0	0	0	0	JERRARD	0	0	AROUSAL (GENERAL)
7_17_19 (9).eaf	00:00:08.837000	GE	TAP/SLAP/KNOCK OBJECT	1	1	0	0	0	0	0	0	0	JERRARD	0	0	AROUSAL (GENERAL)
7_2_18_(10)_2.eaf	00:02:48.902000	GE	PRESENT SEXUAL	0	1	0	1	1	1	0	1	1	UKI	1	1	SEX
7_2_18_(10)_2.eaf	00:02:50.706000	GE	PUSH	0	1	0	1	0	1	0	0	0	JERRARD	1	1	SEX
7_2_18_(10)_2.eaf	00:03:02.779000	GE	SLAP OTHER	1	1	1	1	0	1	0	1	1	JERRARD	1	0	FOOD
7_2_18_(10)_2.eaf	00:03:03.852000	GE	PRESENT BODY PART	1	1	1	1	1	1	1	1	1	ZURI	1	0	FOOD
7_2_18_(10)_2.eaf	00:03:33.500000	GE	LOOK	1	1	1	1	0	1	0	1	1	UKI	1	1	FOOD
7_2_18_(10)_2.eaf	00:04:20.860000	GE	LOOK	1	1	1	1	0	1	0	1	1	JEAN	1	1	FOOD
7_2_18_(10)_2.eaf	00:04:27.560000	GE	LOOK	1	1	1	0	0	1	0	1	1	KIMA	0	1	FOOD
7_2_18_(10)_2.eaf	00:04:58.400000	GE	LOOK	0	1	1	0	0	1	0	1	1	OLIVER	0	1	FOOD
7_2_18_(11)_2.eaf	00:00:00.195000	FE	PLAY FACE	1	1	1	0	0	1	0	1	1	GLENN	1	1	PLAY
7_2_18_(11)_2.eaf	00:00:00.219000	GE	AMB TOUCH	1	1	1	1	0	1	0	1	1	GLENN	1	1	PLAY
7_2_18_(11)_2.eaf	00:03:03.609000	GE	AMB TOUCH	1	1	1	1	0	1	1	1	1	REGINA	1	1	PLAY
7_2_18_(11)_2.eaf	00:03:06.243000	FE	PLAY FACE	1	1	1	1	1	1	0	1	1	REGINA	1	1	PLAY
7_2_18_(11)_2.eaf	00:05:07.365000	GE	PUSH	1	1	1	1	1	1	0	1	1	GLENN	1	1	LOCOMOTION
7_2_18_(11)_2.eaf	00:05:12.292000	GE	AMB TOUCH	0	1	0	1	0	1	1	0	1	SHAUN	1	1	LOCOMOTION
7_2_18_(12)_2.eaf	00:00:13.238000	FE	POUT FACE	1	1	1	0	1	1	1	1	1	GLENN	1	1	SEX
7_2_18_(12)_2.eaf	00:00:14.755000	GE	PRESENT SEXUAL	1	1	1	0	1	1	1	1	1	GLENN	1	1	SEX
7_2_18_(12)_2.eaf	00:00:15.048000	GE	AMB TOUCH	0	1	1	1	1	1	1	1	1	GLENN	1	1	SEX
7_2_18_(12)_2.eaf	00:01:40.499000	GE	AMB TOUCH	0	1	0	1	1	1	0	0	0	SHAUN	1	1	LOCOMOTION
7_2_18_(13)_2.eaf	00:01:56.072000	GE	HAND FLING	1	1	0	1	1	1	0	0	0	GLENN	1	1	REST
7_2_18_(13)_2.eaf	00:02:11.438000	GE	TAP/SLAP/KNOCK OBJECT	1	1	1	0	0	1	0	1	1	OLIVER	1	1	PLAY
7_2_18_(13)_2.eaf	00:02:25.316000	GE	DANGLE	1	1	1	1	0	1	0	1	1	OLIVER	1	1	PLAY
7_2_18_(13)_2.eaf	00:02:29.804000	GE	TAP/SLAP/KNOCK OBJECT	1	1	1	0	1	1	1	0	1	OLIVER	1	1	PLAY
7_2_18_(13)_2.eaf	00:02:41.365000	GE	TAP/SLAP/KNOCK OBJECT	1	1	1	0	0	1	1	1	1	OLIVER	1	1	PLAY
7_2_18_(13)_2.eaf	00:04:38.145000	FE	PLAY FACE	1	1	1	1	1	1	1	1	1	JULIE	1	1	PLAY
7_2_18_(13)_2.eaf	00:04:38.853000	GE	AMB TOUCH	1	1	0	0	1	1	0	1	1	JULIE	1	1	PLAY
7_2_18_(13)_2.eaf	00:04:41.047000	GE	BITE	1	1	0	1	1	1	1	0	1	JULIE	1	1	PLAY
7_2_18_(13)_2.eaf	00:04:43.390000	GE	AMB TOUCH	0	1	0	1	0	1	1	0	1	JULIE	1	1	PLAY
7_2_18_(13)_2.eaf	00:07:48.585000	GE	TAP/SLAP/KNOCK OBJECT	1	1	0	1	0	1	1	0	1	OLIVER	1	1	PLAY
7_2_18_(13)_2.eaf	00:08:09.755000	FE	PLAY FACE	1	1	1	1	1	1	0	1	1	OLIVER	1	1	PLAY
7_2_18_(13)_2.eaf	00:08:11.633000	GE	ROLL OVER	1	1	1	1	1	1	0	1	1	KIMA	1	1	PLAY
7_2_18_(13)_2.eaf	00:09:02.230000	GE	DANGLE	1	1	1	0	0	1	0	1	1	OLIVER	1	1	PLAY
7_2_18_(13)_2.eaf	00:09:05.119000	FE	PLAY FACE	1	1	1	0	0	1	0	1	1	OLIVER	1	1	PLAY
7_2_18_(14)_2.eaf	00:00:20.877000	FE	PLAY FACE	1	1	1	1	1	1	0	1	1	OLIVER	1	1	PLAY
7_2_18_(14)_2.eaf	00:00:21.804000	GE	AMB TOUCH	1	1	1	1	1	1	0	1	1	OLIVER	1	1	PLAY
7_2_18_(15)_2.eaf	00:00:04.146000	FE	PANT HOOT FACE	1	1	1	1	0	0	0	0	0	JEAN	1	0	AROUSAL (GENERAL)
7_2_18_(15)_2.eaf	00:00:48.633000	GE	CLAP	1	1	1	0	0	1	0	1	1	UKI	0	1	PLAY
7_2_18_(15)_2.eaf	00:00:50.560000	GE	TAP/SLAP/KNOCK OBJECT	1	1	1	1	0	1	1	1	1	UKI	0	1	PLAY
7_2_18_(15)_2.eaf	00:01:13.145000	GE	PRESENT BODY PART	1	1	1	1	0	1	0	1	1	UKI	1	1	AFFILIATIVE
7_2_18_(15)_2.eaf	00:01:54.267000	FE	AMBIGUOUS FACE	1	1	1	1	1	1	1	1	1	ZURI	0	1	AFFILIATIVE
7_2_18_(15)_2.eaf	00:01:54.438000	GE	STOMP	1	1	1	1	1	1	0	1	1	ZURI	0	1	AFFILIATIVE
7_2_18_(15)_2.eaf	00:03:33.706000	GE	OBJECT MOVE	1	1	0	0	0	1	0	0	0	UKI	1	1	PLAY
7_2_18_(15)_2.eaf	00:03:35.633000	GE	SWING/ROCK	1	1	1	1	0	1	0	1	1	UKI	1	1	PLAY
7_2_18_(19)_2.eaf	00:01:32.243000	GE	SLAP OTHER WITH OBJECT	1	1	1	1	1	0	0	1	1	UKI	0	1	PLAY
7_2_18_(19)_2.eaf	00:01:42.218000	GE	PUSH	0	1	0	1	0	1	1	0	1	ZURI	0	1	PLAY
7_2_18_(22)_2.eaf	00:00:02.195000	GE	AMB TOUCH	1	1	0	1	1	1	1	0	1	GRACIE	1	1	LOCOMOTION
7_2_18_(22)_2.eaf	00:00:03.170000	GE	AMB TOUCH	1	1	1	1	0	1	0	1	1	REGINA	1	1	LOCOMOTION
7_2_18_(22)_2.eaf	00:00:04.121000	GE	AMB TOUCH	1	0	1	0	1	1	0	0	0	OLIVER	1	1	LOCOMOTION
7_2_18_(24)_2.eaf	00:00:26.781000	GE	AMB TOUCH	1	1	1	1	1	1	0	1	1	ZURI	0	1	FOOD
7_2_18_(25)_2.eaf	00:00:59.815000	GE	AMB TOUCH	0	1	1	0	0	1	0	1	1	OLIVER	0	0	FOOD
7_2_18_(3)_2.eaf	00:02:46.657000	GE	AMB TOUCH	1	1	1	1	0	1	0	1	1	GRACIE	1	1	LOCOMOTION
7_2_18_(3)_2.eaf	00:02:57.316000	GE	PUSH	1	0	1	1	0	1	0	0	0	GRACIE	1	1	LOCOMOTION
7_2_18_(3)_2.eaf	00:02:58.121000	GE	AMB TOUCH	1	1	1	1	0	1	0	1	1	GRACIE	1	1	LOCOMOTION
7_2_18_(3)_2.eaf	00:03:00.145000	GE	PUSH	1	1	0	1	0	1	1	1	1	GRACIE	1	1	LOCOMOTION
7_2_18_(3)_2.eaf	00:03:03.974000	GE	AMB TOUCH	1	0	1	1	0	1	1	1	1	GRACIE	1	1	LOCOMOTION
7_2_18_(3)_2.eaf	00:03:21.731000	GE	AMB TOUCH	0	1	1	1	0	1	0	1	1	GRACIE	1	1	LOCOMOTION
7_2_18_(3)_2.eaf	00:03:23.755000	GE	AMB TOUCH	1	1	0	1	0	1	0	1	1	UKI	1	1	LOCOMOTION
7_2_18_(3)_2.eaf	00:04:30.146000	GE	AMB TOUCH	1	1	1	1	0	1	1	0	1	GRACIE	1	1	PLAY
7_2_18_(3)_2.eaf	00:04:37.072000	GE	AMB TOUCH	1	0	1	1	1	1	0	1	1	GRACIE	1	1	PLAY
7_2_18_(3)_2.eaf	00:04:44.121000	GE	BITE	1	1	0	1	0	1	1	0	1	GRACIE	1	1	PLAY
7_2_18_(3)_2.eaf	00:04:52.024000	GE	AMB TOUCH	1	1	1	0	0	1	0	0	0	GRACIE	1	1	PLAY
7_2_18_(3)_2.eaf	00:05:03.486000	GE	AMB TOUCH	0	1	1	1	0	1	0	1	1	GRACIE	1	1	PLAY
7_2_18_(3)_2.eaf	00:05:05.072000	GE	AMB TOUCH	0	1	1	1	0	1	0	0	0	OLIVER	1	1	PLAY
7_2_18_(3)_2.eaf	00:05:13.121000	GE	HAND FLING	1	1	0	1	1	1	1	0	1	GRACIE	1	1	PLAY
7_2_18_(3)_2.eaf	00:05:19.633000	GE	AMB TOUCH	1	1	1	1	1	1	1	1	1	GRACIE	1	1	PLAY
7_2_18_(3)_2.eaf	00:06:56.244000	GE	AMB TOUCH	1	1	1	1	0	1	1	1	1	GRACIE	1	1	PLAY
7_2_18_(3)_2.eaf	00:09:17.932000	GE	THROW OBJECT	1	1	1	1	1	1	1	1	1	KIMA	1	1	PLAY
7_2_18_(3)_2.eaf	00:09:18.732000	FE	PLAY FACE	1	1	1	1	1	1	0	1	1	KIMA	1	1	PLAY
7_2_18_(3)_2.eaf	00:09:26.532000	GE	SLAP OTHER	1	1	0	1	1	1	0	0	0	NAN	1	1	PLAY
7_2_18_(3)_2.eaf	00:09:27.221000	FE	SCREAM FACE	1	1	0	1	1	1	1	1	1	KIMA	1	1	PLAY
7_2_18_(3)_2.eaf	00:09:27.844000	GE	HAND FLING	1	1	0	1	1	1	1	0	1	NAN	1	1	PLAY
7_2_18_(3)_2.eaf	00:09:28.310000	FE	SCREAM FACE	1	1	1	1	1	1	1	1	1	NAN	1	1	PLAY
7_2_18_(6)_2.eaf	00:01:04.511000	GE	AMB TOUCH	1	1	1	1	0	1	1	1	1	GLENN	1	1	PLAY
7_2_18_(6)_2.eaf	00:01:04.634000	FE	PLAY FACE	1	1	1	1	0	1	1	1	1	GLENN	1	1	PLAY
7_2_18_(6)_2.eaf	00:01:08.414000	FE	PLAY FACE	1	1	1	0	1	1	1	1	1	UKI	1	1	PLAY
7_2_18_(6)_2.eaf	00:01:08.951000	FE	SCREAM FACE	1	1	1	1	1	1	0	1	1	JEAN	1	1	PLAY
7_2_18_(6)_2.eaf	00:01:09.023000	GE	SLAP OTHER	1	1	0	1	1	1	1	0	1	UKI	1	1	PLAY
7_2_18_(6)_2.eaf	00:01:10.560000	GE	AMB TOUCH	0	1	0	1	0	1	1	0	1	GLENN	1	1	PLAY
[truncated: 1,447 more rows]

## Sheet: Average Composite Gesture Score
Signal Type	Gesture? (1=Yes, 0=No)	Average Composite Gesture Score
AMB TOUCH	1	8.46
AMBIGUOUS FACE	0	8.74
ARM RAISE	1	8.55
BARED TEETH FACE	0	6.57
BITE	1	7.71
CLAP	1	8.58
DANGLE	1	9.63
DIRECTED PUSH	1	7.75
EMBRACE	1	7.4
HAND FLING	1	8.54
JUMP	1	8.04
KICK	1	8.3
LIPSMACKING FACE	0	6.08
LOOK	1	7.82
LOWER LIP RELAXER FACE	0	9.1
OBJECT MOVE	1	9.16
PANT HOOT FACE	0	6.56
PIROUETTE	1	8.46
PLAY FACE	0	9.27
POUT FACE	0	8.73
PRESENT BODY PART	1	9.18
PRESENT CLIMB ON ME	1	9.24
PRESENT SEXUAL	1	9.21
PUNCH OTHER	1	8.55
PUSH	1	8.15
RASPBERRY FACE	0	7.26
REACH	1	9.13
ROLL OVER	1	8.63
SCREAM FACE	0	8.13
SLAP OTHER	1	8.97
SLAP OTHER WITH OBJECT	1	9.39
STOMP	1	8.23
SWING/ROCK	1	7.6
TANDEM WALK	1	8.5
TAP/SLAP/KNOCK OBJECT	1	7.31
THROW OBJECT	1	8.25

## Sheet: CTIScores
Mode (1=gesture, 0=facial expression)	Signal Type	Context Tie Index Score
1	AMB TOUCH	0.33589
0	AMBIGUOUS FACE	0.362832
1	ARM RAISE	0.381579
0	BARED TEETH FACE	0.245283
1	BITE	0.47619
1	CLAP	0.515152
1	DANGLE	0.928571
1	DIRECTED PUSH	0.75
1	EMBRACE	0.768657
1	HAND FLING	0.519231
1	JUMP	0.36
1	KICK	0.5
0	LIPSMACKING FACE	0.988095
1	LOOK	0.95045
0	LOWER LIP RELAXER FACE	0.305085
1	OBJECT MOVE	0.894737
0	PANT HOOT FACE	0.486755
1	PIROUETTE	1
0	PLAY FACE	0.931655
0	POUT FACE	0.272727
1	PRESENT BODY PART	0.605634
1	PRESENT CLIMB ON ME	0.913043
1	PRESENT SEXUAL	0.793103
1	PUNCH OTHER	0.5
1	PUSH	0.553571
0	RASPBERRY FACE	0.722222
1	REACH	0.395604
1	ROLL OVER	0.736842
0	SCREAM FACE	0.52
1	SLAP OTHER	0.650485
1	SLAP OTHER WITH OBJECT	0.878788
1	STOMP	0.692308
1	SWING/ROCK	0.317919
1	TANDEM WALK	0.545455
1	TAP/SLAP/KNOCK OBJECT	0.581633
1	THROW OBJECT	0.839286

## Sheet: CTIScores_PDWTest
Mode (1=gesture, 0=facial expression)	Signal Type	Context Tie Index Score
1	AMB TOUCH	0.33589
1	ARM RAISE	0.381579
0	BARED TEETH FACE	0.245283
0	LOWER LIP RELAXER FACE	0.305085
0	PANT HOOT FACE	0.486755
1	REACH	0.395604
0	SCREAM FACE	0.52

## Sheet: IRR Info - Facial Expressions
File	Begin Time - ss.msec	End Time - hh:mm:ss.ms	End Time - ss.msec		SY Answer	BNF Answer	Agreement
6_18_2018 (1)_N_SAY.eaf	52.708	00:00:54.371000	54.371		PLAY FACE	AMBIGUOUS FACE	0
6_18_2018 (1)_N_SAY.eaf	161.432	00:02:50.729000	170.729		PANT HOOT FACE	PANT HOOT FACE	1
6_18_2018 (1)_N_SAY.eaf	190.737	00:03:12.746000	192.746		AMBIGUOUS FACE	PANT HOOT FACE	0
6_18_2018 (1)_N_SAY.eaf	216.772	00:03:38.460000	218.46		PLAY FACE	LOWER LIP RELAXER FACE	0
6_18_2018 (1)_N_SAY.eaf	218.481	00:03:39.134000	219.134		PLAY FACE	PLAY FACE	1
6_18_2018 (1)_N_SAY.eaf	219.134	00:03:41.978000	221.978		PLAY FACE	AMBIGUOUS FACE	0
6_18_2018_(16)_N_SAY.eaf	138.093	00:02:22.190000	142.19		LIPSMACKING FACE	AMBIGUOUS FACE	0
6_18_2018_(18)_SAY.eaf	721.428	00:12:06.237000	726.237		PANT HOOT FACE	PANT HOOT FACE	1
6_18_2018_(18)_SAY.eaf	726.237	00:12:12.856000	732.856		RASPBERRY FACE	RASPBERRY FACE	1
6_18_2018_(18)_SAY.eaf	733.048	00:12:13.486000	733.486		RASPBERRY FACE	RASPBERRY FACE	1
6_18_2018_(18)_SAY.eaf	733.486	00:13:01.120000	781.12		LIPSMACKING FACE	LIPSMACKING FACE	1
6_18_2018_(18)_SAY.eaf	781.28	00:13:19.160000	799.16		LIPSMACKING FACE	LIPSMACKING FACE	1
6_18_2018_(18)_SAY.eaf	808.12	00:13:38.360000	818.36		RASPBERRY FACE	RASPBERRY FACE	1
6_18_2018_(18)_SAY.eaf	835.72	00:13:56.960000	836.96		LIPSMACKING FACE	LIPSMACKING FACE	1
6_18_2018_(18)_SAY.eaf	862.96	00:14:31.600000	871.6		LIPSMACKING FACE	LIPSMACKING FACE	1
6_18_2018_(18)_SAY.eaf	885.2	00:15:14	914		LIPSMACKING FACE	RASPBERRY FACE	0
6_18_2018_(18)_SAY.eaf	1007.2	00:16:58.310000	1018.31		PLAY FACE	PLAY FACE	1
6_18_2018_(18)_SAY.eaf	1018.4	00:17:17.080000	1037.08		PLAY FACE	PLAY FACE	1
6_18_2018_(19)_N_SAY.eaf	4.829	00:00:11.317000	11.317		AMBIGUOUS FACE	LOWER LIP RELAXER FACE	0
6_18_2018_(19)_N_SAY.eaf	59.476	00:01:03.159000	63.159		AMBIGUOUS FACE	AMBIGUOUS FACE	1
6_18_2018_(19)_N_SAY.eaf	135.181	00:02:17.108000	137.108		PLAY FACE	PLAY FACE	1
6_18_2018_(19)_N_SAY.eaf	150.843	00:02:35.136000	155.136		PLAY FACE	PLAY FACE	1
6_18_2018_(19)_N_SAY.eaf	155.185	00:02:38.843000	158.843		PLAY FACE	PLAY FACE	1
6_18_2018_(19)_N_SAY.eaf	188.138	00:03:11.894000	191.894		LOWER LIP RELAXER FACE	LOWER LIP RELAXER FACE	1
6_18_2018_(19)_N_SAY.eaf	196.845	00:03:22.992000	202.992		POUT FACE	PANT HOOT FACE	0
6_18_2018_(28)_N_SAY.eaf	12.194	00:00:27.633000	27.633		SCREAM FACE	SCREAM FACE	1
6_18_2018_(37)_N_SAY.eaf	192.603	00:03:19.154000	199.154		PANT HOOT FACE	PANT HOOT FACE	1
6_18_2018_(37)_N_SAY.eaf	204.964	00:03:26.740000	206.74		PLAY FACE	AMBIGUOUS FACE	0
6_18_2018_(37)_N_SAY.eaf	209.568	00:03:35.171000	215.171		PANT HOOT FACE	PANT HOOT FACE	1
6_18_2018_(37)_N_SAY.eaf	246.327	00:04:14.861000	254.861		PLAY FACE	PANT HOOT FACE	0
6_18_2018_(9)_SAY.eaf	0.074	00:00:14.243000	14.243		PLAY FACE	PLAY FACE	1
6_25_18_(27)_N_SAY.eaf	46.169	00:00:59.779000	59.779		PLAY FACE	PLAY FACE	1
6_25_18_(27)_N_SAY.eaf	59.779	00:01:07.169000	67.169		PLAY FACE	PLAY FACE	1
6_25_18_(34)_N_SAYeaf.eaf	37.779	00:00:43.804000	43.804		AMBIGUOUS FACE	AMBIGUOUS FACE	1
6_25_18_(34)_N_SAYeaf.eaf	48.56	00:00:55.633000	55.633		SCREAM FACE	SCREAM FACE	1
6_25_18_(34)_N_SAYeaf.eaf	55.633	00:00:59.877000	59.877		BARED TEETH FACE	BARED TEETH FACE	1
6_26_18_(14)_N_SAYeaf.eaf	257.591	00:04:19.651000	259.651		PLAY FACE	PLAY FACE	1
6_26_18_(14)_N_SAYeaf.eaf	259.651	00:04:23.407000	263.407		PLAY FACE	AMBIGUOUS FACE	0
6_26_18_(14)_N_SAYeaf.eaf	265.591	00:04:26.134000	266.134		PLAY FACE	AMBIGUOUS FACE	0
6_26_18_(14)_N_SAYeaf.eaf	266.134	00:04:29.782000	269.782		N/A	PLAY FACE	0
6_26_18_(14)_N_SAYeaf.eaf	274.944	00:04:36.377000	276.377		PLAY FACE	PLAY FACE	1
6_26_18_(14)_N_SAYeaf.eaf	276.377	00:04:38.118000	278.118		PANT HOOT FACE	PANT HOOT FACE	1
6_26_18_(18)_N_SAYeaf.eaf	28.121	00:00:34.365000	34.365		PANT HOOT FACE	PANT HOOT FACE	1
6_26_18_(18)_N_SAYeaf.eaf	37.267	00:00:43.535000	43.535		PANT HOOT FACE	PANT HOOT FACE	1
6_26_18_(18)_N_SAYeaf.eaf	78.609	00:01:40.146000	100.146		PANT HOOT FACE	PANT HOOT FACE	1
6_26_18_(18)_N_SAYeaf.eaf	274.682	00:04:40.023000	280.023		SCREAM FACE	SCREAM FACE	1
6_26_18_(2)_N_SAY.eaf	25.829	00:00:33.158000	33.158		PANT HOOT FACE	POUT FACE	0
6_26_18_(20)_N_SAY.eaf	0.073	00:00:05.634000	5.634		PANT HOOT FACE	PANT HOOT FACE	1
6_26_18_(20)_N_SAY.eaf	6.146	00:00:21.853000	21.853		PANT HOOT FACE	PANT HOOT FACE	1
6_26_18_(20)_N_SAY.eaf	30.048	00:00:44.413000	44.413		PANT HOOT FACE	PANT HOOT FACE	1
6_26_18_(20)_N_SAY.eaf	44.73	00:01:10.218000	70.218		N/A	PANT HOOT FACE	0
6_26_18_(20)_N_SAY.eaf	122.575	00:02:15.147000	135.147		PANT HOOT FACE	PANT HOOT FACE	1
6_26_18_(20)_N_SAY.eaf	135.147	00:02:23.391000	143.391		PANT HOOT FACE	PANT HOOT FACE	1
6_26_18_(20)_N_SAY.eaf	145.586	00:02:29.342000	149.342		PANT HOOT FACE	PANT HOOT FACE	1
6_26_18_(20)_N_SAY.eaf	173.26	00:03:02.577000	182.577		PLAY FACE	LOWER LIP RELAXER FACE	0
6_26_18_(20)_N_SAY.eaf	205.118	00:03:29.875000	209.875		PLAY FACE	PANT HOOT FACE	0
6_28_18_(6)_N_SAY.eaf	11.023	00:00:23.219000	23.219		PANT HOOT FACE	PANT HOOT FACE	1
6_29_18_(1)_N_SAYeaf.eaf	6.845	00:00:10.069000	10.069		SCREAM FACE	SCREAM FACE	1
6_29_18_(1)_N_SAYeaf.eaf	10.069	00:00:12.112000	12.112		PANT HOOT FACE	PANT HOOT FACE	1
6_29_18_(1)_N_SAYeaf.eaf	16.017	00:00:20.189000	20.189		PANT HOOT FACE	PANT HOOT FACE	1
6_29_18_(31)_N_SAY.eaf	319.44	00:05:21.760000	321.76		POUT FACE	POUT FACE	1
6_29_18_(31)_N_SAY.eaf	442.585	00:07:23.705000	443.705		PANT HOOT FACE	AMBIGUOUS FACE	0
6_29_18_(31)_N_SAY.eaf	812.3	00:13:41.140000	821.14		PANT HOOT FACE	PANT HOOT FACE	1
6_29_18_(31)_N_SAY.eaf	840.894	00:14:03.494000	843.494		LOWER LIP RELAXER FACE	LOWER LIP RELAXER FACE	1
6_29_18_(31)_N_SAY.eaf	1259.47	00:21:02.892000	1262.89		PANT HOOT FACE	PANT HOOT FACE	1
6_29_18_(31)_N_SAY.eaf	1268.65	00:21:23.552000	1283.55		SCREAM FACE	SCREAM FACE	1
6_29_18_(31)_N_SAY.eaf	1283.61	00:21:25.688000	1285.69		AMBIGUOUS FACE	PANT HOOT FACE	0
6_29_18_(31)_N_SAY.eaf	1285.74	00:21:36.500000	1296.5		SCREAM FACE	SCREAM FACE	1
6_29_18_(31)_N_SAY.eaf	1321.9	00:22:05.871000	1325.87		SCREAM FACE	SCREAM FACE	1
6_29_18_(31)_N_SAY.eaf	1370.39	00:22:58.893000	1378.89		PANT HOOT FACE	PANT HOOT FACE	1
6_29_18_(31)_N_SAY.eaf	1471.22	00:24:40.685000	1480.68		PANT HOOT FACE	PANT HOOT FACE	1
6_29_18_(31)_N_SAY.eaf	1480.78	00:24:53.443000	1493.44		PANT HOOT FACE	PANT HOOT FACE	1
6_29_18_(31)_N_SAY.eaf	1573.48	00:26:17.451000	1577.45		AMBIGUOUS FACE	PANT HOOT FACE	0
6_29_18_(31)_N_SAY.eaf	1591.84	00:26:40.774000	1600.77		PANT HOOT FACE	PANT HOOT FACE	1
6_29_18_(31)_N_SAY.eaf	1623.44	00:27:10.320000	1630.32		BARED TEETH FACE	SCREAM FACE	0
6_29_18_(31)_N_SAY.eaf	1652.21	00:27:34.873000	1654.87		LOWER LIP RELAXER FACE	LOWER LIP RELAXER FACE	1
6_29_18_(31)_N_SAY.eaf	1671.87	00:27:57.576000	1677.58		PANT HOOT FACE	PANT HOOT FACE	1
6_29_18_(31)_N_SAY.eaf	1688.08	00:28:09.593000	1689.59		SCREAM FACE	SCREAM FACE	1
6_29_18_(31)_N_SAY.eaf	1689.59	00:28:13.056000	1693.06		SCREAM FACE	SCREAM FACE	1
6_29_18_(31)_N_SAY.eaf	1702.02	00:28:29.848000	1709.85		BARED TEETH FACE	SCREAM FACE	0
6_29_18_(31)_N_SAY.eaf	1718.45	00:28:52.061000	1732.06		SCREAM FACE	SCREAM FACE	1
6_29_18_(31)_N_SAY.eaf	1732.06	00:28:57	1737		SCREAM FACE	SCREAM FACE	1
6_29_18_(31)_N_SAY.eaf	1794.7	00:29:58.961000	1798.96		SCREAM FACE	SCREAM FACE	1
6_29_18_(31)_N_SAY.eaf	1828.04	00:30:43.247000	1843.25		SCREAM FACE	SCREAM FACE	1
6_29_18_(31)_N_SAY.eaf	1860.26	00:31:17.157000	1877.16		SCREAM FACE	SCREAM FACE	1
6_29_18_(31)_N_SAY.eaf	1913.04	00:32:02.096000	1922.1		PANT HOOT FACE	PANT HOOT FACE	1
6_29_18_(31)_N_SAY.eaf	1975.15	00:35:48.509000	2148.51		SCREAM FACE	SCREAM FACE	1
6_29_18_(31)_N_SAY.eaf	2240.39	00:37:36.157000	2256.16		SCREAM FACE	SCREAM FACE	1
6_29_18_(31)_N_SAY.eaf	2735.92	00:45:45.890000	2745.89		PLAY FACE	PLAY FACE	1
6_29_18_(31)_N_SAY.eaf	2770.73	00:46:14.489000	2774.49		PLAY FACE	PLAY FACE	1
6_29_18_(5)_N_SAY.eaf	34.219	00:00:39.585000	39.585		PLAY FACE	PLAY FACE	1
6_29_18_(5)_N_SAY.eaf	39.585	00:00:44.902000	44.902		PLAY FACE	PLAY FACE	1
6_29_18_(5)_N_SAY.eaf	45.999	00:00:47.316000	47.316		PANT HOOT FACE	PANT HOOT FACE	1
6_29_18_(5)_N_SAY.eaf	51.633	00:00:54.511000	54.511		BARED TEETH FACE	PLAY FACE	0
6_29_18_(5)_N_SAY.eaf	54.584	00:00:57.999000	57.999		AMBIGUOUS FACE	RASPBERRY FACE	0
7_11_18_(14)_N_SAY.eaf	65.389	00:01:57.999000	117.999		LIPSMACKING FACE	LIPSMACKING FACE	1
7_11_18_(14)_N_SAY.eaf	123.486	00:02:08.706000	128.706		AMBIGUOUS FACE	AMBIGUOUS FACE	1
7_11_18_(14)_N_SAY.eaf	187.999	00:04:34.304000	274.304		LIPSMACKING FACE	LIPSMACKING FACE	1
7_11_18_(15)_N_SAY.eaf	95.389	00:02:07.292000	127.292		SCREAM FACE	SCREAM FACE	1
7_11_18_(16)_N_SAY.eaf	14.894	00:00:42.414000	42.414		AMBIGUOUS FACE	PANT HOOT FACE	0
7_12_18_(17)_SAY.eaf	3.294	00:00:07.647000	7.647		PANT HOOT FACE	PANT HOOT FACE	1
7_12_18_(17)_SAY.eaf	7.754	00:00:56.288000	56.288		SCREAM FACE	SCREAM FACE	1
7_12_18_(17)_SAY.eaf	56.305	00:01:03.815000	63.815		SCREAM FACE	SCREAM FACE	1
7_12_18_(17)_SAY.eaf	73.999	00:01:17.387000	77.387		SCREAM FACE	SCREAM FACE	1
7_12_18_(17)_SAY.eaf	86.67	00:01:27.337000	87.337		PLAY FACE	SCREAM FACE	0
7_12_18_(17)_SAY.eaf	87.337	00:01:30.141000	90.141		PLAY FACE	SCREAM FACE	0
7_12_18_(17)_SAY.eaf	117.999	00:02:06.432000	126.432		PLAY FACE	PLAY FACE	1
7_2_18_(11)_N_SAY.eaf	0.195	00:00:05.658000	5.658		PLAY FACE	PLAY FACE	1
7_2_18_(11)_N_SAY.eaf	186.243	00:03:10.707000	190.707		PLAY FACE	PLAY FACE	1
7_2_18_(13)_N_SAY.eaf	278.145	00:04:41.194000	281.194		PLAY FACE	PLAY FACE	1
7_2_18_(13)_N_SAY.eaf	489.755	00:08:14.657000	494.657		BARED TEETH FACE	PLAY FACE	0
7_2_18_(13)_N_SAY.eaf	545.119	00:09:10.230000	550.23		PLAY FACE	PLAY FACE	1
7_23_18_(19)_SAY.eaf	7.972	00:00:09.077000	9.077		BARED TEETH FACE	SCREAM FACE	0
7_23_18_(19)_SAY.eaf	543.886	00:09:07.305000	547.305		PLAY FACE	AMBIGUOUS FACE	0
7_26_18_(13)_SAY.eaf	192.975	00:03:16.758000	196.758		PLAY FACE	PLAY FACE	1
7_26_18_(13)_SAY.eaf	240.44	00:04:02.223000	242.223		AMBIGUOUS FACE	PLAY FACE	0
7_26_18_(13)_SAY.eaf	705.497	00:11:49.118000	709.118		PLAY FACE	PLAY FACE	1
7_26_18_(13)_SAY.eaf	899.223	00:15:07.358000	907.358		AMBIGUOUS FACE	PLAY FACE	0
7_26_18_(13)_SAY.eaf	939.92	00:15:59.191000	959.191		PLAY FACE	PLAY FACE	1
7_26_18_(13)_SAY.eaf	1043.13	00:17:24.994000	1044.99		LOWER LIP RELAXER FACE	PLAY FACE	0
7_26_18_(13)_SAY.eaf	1044.99	00:17:26.454000	1046.45		BARED TEETH FACE	PLAY FACE	0
7_26_18_(13)_SAY.eaf	1099.21	00:18:24.427000	1104.43		PLAY FACE	PLAY FACE	1
7_26_18_(13)_SAY.eaf	1139.34	00:19:07.108000	1147.11		BARED TEETH FACE	PLAY FACE	0
7_26_18_(13)_SAY.eaf	1226.4	00:20:38.399000	1238.4		BARED TEETH FACE	PLAY FACE	0
7_26_18_(3)_SAY.eaf	151.448	00:03:00.091000	180.091		BARED TEETH FACE	BARED TEETH FACE	1
7_26_18_(3)_SAY.eaf	181.025	00:03:04.755000	184.755		PLAY FACE	PLAY FACE	1
7_9_18_(16)_N_SAY.eaf	132.608	00:02:29.657000	149.657		PLAY FACE	PLAY FACE	1
7_9_18_(16)_N_SAY.eaf	280.682	00:04:44.535000	284.535		AMBIGUOUS FACE	AMBIGUOUS FACE	1
8_10_18_(13)_SAY.eaf	179.227	00:03:00.497000	180.497		LOWER LIP RELAXER FACE	LOWER LIP RELAXER FACE	1
8_2_18_(13)_SAY.eaf	29.141	00:00:30.330000	30.33		BARED TEETH FACE	BARED TEETH FACE	1
8_2_18_(13)_SAY.eaf	40.854	00:00:47.232000	47.232		RASPBERRY FACE	RASPBERRY FACE	1
8_2_18_(14)_SAY.eaf	19.849	00:00:21.525000	21.525		BARED TEETH FACE	BARED TEETH FACE	1
8_2_18_(14)_SAY.eaf	43.429	00:01:05.173000	65.173		RASPBERRY FACE	RASPBERRY FACE	1
8_2_18_(14)_SAY.eaf	118.381	00:02:05.273000	125.273		AMBIGUOUS FACE	PANT HOOT FACE	0
8_2_18_(14)_SAY.eaf	290.003	00:05:32.095000	332.095		PANT HOOT FACE	PANT HOOT FACE	1
8_2_18_(14)_SAY.eaf	422.472	00:07:06.040000	426.04		PLAY FACE	PLAY FACE	1
8_2_18_(14)_SAY.eaf	426.04	00:07:13.040000	433.04		RASPBERRY FACE	RASPBERRY FACE	1
8_2_18_(14)_SAY.eaf	435.602	00:07:30.467000	450.467		LIPSMACKING FACE	LIPSMACKING FACE	1
8_2_18_(14)_SAY.eaf	672.999	00:11:17.012000	677.012		PANT HOOT FACE	PANT HOOT FACE	1
8_2_18_(14)_SAY.eaf	677.012	00:11:20.607000	680.607		AMBIGUOUS FACE	PANT HOOT FACE	0
8_2_18_(14)_SAY.eaf	776.997	00:12:57.821000	777.821		PLAY FACE	PLAY FACE	1
8_2_18_(14)_SAY.eaf	777.821	00:13:07.699000	787.699		PLAY FACE	PLAY FACE	1
8_2_18_(14)_SAY.eaf	915.819	00:15:20.383000	920.383		PLAY FACE	PLAY FACE	1
8_2_18_(14)_SAY.eaf	920.383	00:15:32.316000	932.316		PLAY FACE	PLAY FACE	1
8_2_18_(14)_SAY.eaf	934.025	00:15:40.922000	940.922		PLAY FACE	PLAY FACE	1
8_2_18_(14)_SAY.eaf	971.246	00:16:26.392000	986.392		PLAY FACE	PLAY FACE	1
8_6_18_(19)_SAY.eaf	152.506	00:02:45.615000	165.615		LOWER LIP RELAXER FACE	LOWER LIP RELAXER FACE	1
8_7_18_(7)_SAY.eaf	3.108	00:00:08.513000	8.513		PANT HOOT FACE	PANT HOOT FACE	1
8_8_18_(10)_SAY.eaf	7.054	00:00:09.675000	9.675		AMBIGUOUS FACE	PANT HOOT FACE	0
					AGREEMENT:		0.748299

## Sheet: IRR Info - Manual Gestures
File	Begin Time - hh:mm:ss.ms	End Time - hh:mm:ss.ms	Duration - hh:mm:ss.ms		MWC Gesture Type (Before Category Condensing)	BNF Gesture Type (Before Category Condensing)	Agreement		MWC Gesture Type (After Category Condensing)	BNF Gesture Type (After Category Condensing)	Agreement
6_18_2018 (1)_N_BLANK.eaf	00:00:32.730000	00:00:35.657000	00:00:02.927000		TOUCH OTHER	DIRECTED PUSH	0		AMB TOUCH	DIRECTED PUSH	0
6_18_2018 (1)_N_BLANK.eaf	00:00:52.243000	00:00:53.121000	00:00:00.878000		PRESENT BODY PART	TOUCH OTHER	0		PRESENT BODY PART	AMB TOUCH	0
6_18_2018 (1)_N_BLANK.eaf	00:00:53.462000	00:01:00.168000	00:00:06.706000		HAND ON	EMBRACE	0		AMB TOUCH	EMBRACE	0
6_18_2018 (1)_N_BLANK.eaf	00:03:37.446000	00:03:38.212000	00:00:00.766000		HIT WITH OBJECT	SLAP OTHER WITH OBJECT	0		HIT WITH OBJECT	SLAP OTHER WITH OBJECT	0
6_18_2018 (1)_N_BLANK.eaf	00:03:39.182000	00:03:39.517000	00:00:00.335000		UNSURE/UNKNOWN	HAND FLING	0		UNSURE/UNKNOWN	HAND FLING	0
6_18_2018 (1)_N_BLANK.eaf	00:03:39.616000	00:03:41.438000	00:00:01.822000		ARM WAVE	ARM WAVE	1		ARM WAVE	ARM WAVE	1
6_18_2018 (1)_N_BLANK.eaf	00:03:41.452000	00:03:42.126000	00:00:00.674000		HAND FLING	HAND FLING	1		HAND FLING	HAND FLING	1
6_18_2018_(16)_N_BLANK.eaf	00:01:06.876000	00:01:19.567000	00:00:12.691000		UNSURE/UNKNOWN	GALLOP	0		UNSURE/UNKNOWN	GALLOP	0
6_18_2018_(16)_N_BLANK.eaf	00:02:14.482000	00:02:22.385000	00:00:07.903000		LOOK	LOOK	1		LOOK	LOOK	1
6_18_2018_(18)_N_BLANK.eaf	00:16:44.640000	00:16:49.140000	00:00:04.500000		GRAB PULL	GRAB PULL	1		AMB TOUCH	AMB TOUCH	1
6_18_2018_(18)_N_BLANK.eaf	00:16:49.140000	00:16:55.940000	00:00:06.800000		PRESENT BODY PART	BITE	0		PRESENT BODY PART	BITE	0
6_18_2018_(18)_N_BLANK.eaf	00:16:57.160000	00:17:01.440000	00:00:04.280000		GRAB	GRAB PULL	0		AMB TOUCH	AMB TOUCH	1
6_18_2018_(18)_N_BLANK.eaf	00:17:01.520000	00:17:11.640000	00:00:10.120000		BITE	BITE	1		BITE	BITE	1
6_18_2018_(18)_N_BLANK.eaf	00:17:13.223000	00:17:20.160000	00:00:06.937000		TOUCH OTHER	GRAB PULL	0		AMB TOUCH	AMB TOUCH	1
6_18_2018_(18)_N_BLANK.eaf	00:18:20.920000	00:18:26	00:00:05.080000		POKE	DIRECTED PUSH	0		POKE	DIRECTED PUSH	0
6_18_2018_(19)_N_BLANK.eaf	00:00:27.051000	00:00:39.026000	00:00:11.975000		BITE	BITE	1		BITE	BITE	1
6_18_2018_(19)_N_BLANK.eaf	00:00:53.238000	00:00:58.677000	00:00:05.439000		GRAB	GRAB	1		AMB TOUCH	AMB TOUCH	1
6_18_2018_(19)_N_BLANK.eaf	00:01:56.781000	00:01:57.609000	00:00:00.828000		TOUCH OTHER	HAND ON	0		AMB TOUCH	AMB TOUCH	1
6_18_2018_(19)_N_BLANK.eaf	00:01:57.609000	00:02:01.780000	00:00:04.171000		BITE	BITE	1		BITE	BITE	1
6_18_2018_(19)_N_BLANK.eaf	00:02:14.815000	00:02:16.547000	00:00:01.732000		HAND ON	HAND ON	1		AMB TOUCH	AMB TOUCH	1
6_18_2018_(19)_N_BLANK.eaf	00:02:35.965000	00:02:38.111000	00:00:02.146000		HAND ON	HAND ON	1		AMB TOUCH	AMB TOUCH	1
6_18_2018_(19)_N_BLANK.eaf	00:03:06.018000	00:03:07.628000	00:00:01.610000		LOOK	GRAB	0		LOOK	AMB TOUCH	0
6_18_2018_(19)_N_BLANK.eaf	00:03:16.211000	00:03:22.016000	00:00:05.805000		REACH	REACH	1		REACH	REACH	1
6_18_2018_(19)_N_BLANK.eaf	00:03:22.585000	00:03:25.512000	00:00:02.927000		BITE	BITE	1		BITE	BITE	1
6_18_2018_(19)_N_BLANK.eaf	00:03:26.829000	00:03:30.414000	00:00:03.585000		UNSURE/UNKNOWN	BITE	0		UNSURE/UNKNOWN	BITE	0
6_18_2018_(19)_N_BLANK.eaf	00:03:33.882000	00:03:36.540000	00:00:02.658000		THRUST	THRUST	1		THRUST	THRUST	1
6_18_2018_(19)_N_BLANK.eaf	00:04:25.154000	00:04:34.471000	00:00:09.317000		BITE	BITE	1		BITE	BITE	1
6_18_2018_(19)_N_BLANK.eaf	00:04:40.194000	00:04:42.316000	00:00:02.122000		THRUST	THRUST	1		THRUST	THRUST	1
6_18_2018_(28)_N_BLANK.eaf	00:00:08.657000	00:00:11.267000	00:00:02.610000		SLAP OTHER	HAND ON	0		SLAP OTHER	AMB TOUCH	0
6_18_2018_(28)_N_BLANK.eaf	00:00:25.172000	00:00:29.611000	00:00:04.439000		HEAD NOD	ROCKING	0		HEAD NOD	SWING/ROCK	0
6_18_2018_(28)_N_BLANK.eaf	00:00:29.634000	00:00:30.442000	00:00:00.808000		ROCKING	ARM SWING	0		SWING/ROCK	SWING/ROCK	1
6_18_2018_(28)_N_BLANK.eaf	00:00:30.442000	00:00:33.327000	00:00:02.885000		HEAD NOD	ROCKING	0		HEAD NOD	SWING/ROCK	0
6_18_2018_(37)_N_BLANK.eaf	00:03:25.176000	00:03:28.352000	00:00:03.176000		TOUCH OTHER	HAND ON	0		AMB TOUCH	AMB TOUCH	1
6_18_2018_(9)_N_BLANK.eaf	00:00:00.268000	00:00:12.195000	00:00:11.927000		DANGLE	LEG SWING	0		DANGLE	LEG SWING	0
6_25_18_(27)_N_BLANK.eaf	00:00:59.560000	00:01:03.316000	00:00:03.756000		SLAP OTHER	SLAP OTHER	1		SLAP OTHER	SLAP OTHER	1
6_25_18_(27)_N_BLANK.eaf	00:01:03.340000	00:01:07.194000	00:00:03.854000		GRAB PULL	GRAB PULL	1		AMB TOUCH	AMB TOUCH	1
6_25_18_(34)_N_BLANK.eaf	00:00:43.926000	00:00:47.731000	00:00:03.805000		PRESENT SEXUAL	PRESENT BODY PART	0		PRESENT SEXUAL	PRESENT BODY PART	0
6_25_18_(34)_N_BLANK.eaf	00:00:47.756000	00:00:49.585000	00:00:01.829000		TOUCH OTHER	GRAB PULL	0		AMB TOUCH	AMB TOUCH	1
6_25_18_(34)_N_BLANK.eaf	00:00:49.609000	00:00:50.756000	00:00:01.147000		BITE	BITE	1		BITE	BITE	1
6_25_18_(34)_N_BLANK.eaf	00:00:50.756000	00:00:53.048000	00:00:02.292000		TOUCH OTHER	GRAB	0		AMB TOUCH	AMB TOUCH	1
6_25_18_(34)_N_BLANK.eaf	00:00:56.633000	00:00:59.925000	00:00:03.292000		HAND ON	EMBRACE	0		AMB TOUCH	EMBRACE	0
6_26_18_(14)_N_BLANK.eaf	00:00:52.166000	00:01:13.239000	00:00:21.073000		HEAD STAND	HEAD STAND	1		HEAD STAND	HEAD STAND	1
6_26_18_(14)_N_BLANK.eaf	00:01:15.755000	00:01:18.487000	00:00:02.732000		DRUM OBJECT (PALMS)	KNOCK OBJECT	0		TAP/SLAP/KNOCK OBJECT	TAP/SLAP/KNOCK OBJECT	1
6_26_18_(14)_N_BLANK.eaf	00:01:20.011000	00:01:25.645000	00:00:05.634000		SLAP OTHER WITH OBJECT	SLAP OTHER WITH OBJECT	1		SLAP OTHER WITH OBJECT	SLAP OTHER WITH OBJECT	1
6_26_18_(14)_N_BLANK.eaf	00:04:18.700000	00:04:22.147000	00:00:03.447000		TOUCH OTHER	SLAP OTHER	0		AMB TOUCH	SLAP OTHER	0
6_26_18_(14)_N_BLANK.eaf	00:04:22.147000	00:04:23.166000	00:00:01.019000		PUSH	PUSH	1		PUSH	PUSH	1
6_26_18_(14)_N_BLANK.eaf	00:04:27.264000	00:04:28.199000	00:00:00.935000		SLAP OTHER	SLAP OTHER	1		SLAP OTHER	SLAP OTHER	1
6_26_18_(14)_N_BLANK.eaf	00:04:28.199000	00:04:29.708000	00:00:01.509000		PUSH	PUSH	1		PUSH	PUSH	1
6_26_18_(14)_N_BLANK.eaf	00:04:35.424000	00:04:36.461000	00:00:01.037000		TOUCH OTHER	ARM RAISE	0		AMB TOUCH	ARM RAISE	0
6_26_18_(14)_N_BLANK.eaf	00:04:38.553000	00:04:40.831000	00:00:02.278000		TAP OTHER	SLAP OTHER	0		AMB TOUCH	SLAP OTHER	0
6_26_18_(18)_N_BLANK.eaf	00:04:35.853000	00:04:36.829000	00:00:00.976000		JUMP	CLAP	0		JUMP	CLAP	0
6_26_18_(2)_N_BLANK.eaf	00:00:17.141000	00:00:20.726000	00:00:03.585000		LOOK	LOOK	1		LOOK	LOOK	1
6_26_18_(20)_N_BLANK.eaf	00:02:20.671000	00:02:21.891000	00:00:01.220000		HEAD NOD	ARM SWING	0		HEAD NOD	SWING/ROCK	0
6_26_18_(20)_N_BLANK.eaf	00:02:49.898000	00:02:54.751000	00:00:04.853000		OBJECT SHAKE	OBJECT SHAKE	1		OBJECT SHAKE	OBJECT SHAKE	1
6_26_18_(20)_N_BLANK.eaf	00:02:54.800000	00:02:58.194000	00:00:03.394000		OBJECT SHAKE	SLAP OTHER WITH OBJECT	0		OBJECT SHAKE	SLAP OTHER WITH OBJECT	0
6_26_18_(20)_N_BLANK.eaf	00:02:58.194000	00:03:00.536000	00:00:02.342000		HAND FLING	REACH	0		HAND FLING	REACH	0
6_26_18_(20)_N_BLANK.eaf	00:03:25.413000	00:03:27.145000	00:00:01.732000		HAND FLING	REACH	0		HAND FLING	REACH	0
6_28_18_(6)_N_BLANK.eaf	00:00:33.317000	00:00:37.487000	00:00:04.170000		POKE	PUSH	0		POKE	PUSH	0
6_28_18_(6)_N_BLANK.eaf	00:01:00.584000	00:01:04.657000	00:00:04.073000		DIRECTED PUSH	PUSH	0		DIRECTED PUSH	PUSH	0
6_29_18_(1)_N_BLANK.eaf	00:00:07.397000	00:00:10.357000	00:00:02.960000		SLAP OTHER	SLAP OTHER	1		SLAP OTHER	SLAP OTHER	1
6_29_18_(1)_N_BLANK.eaf	00:00:10.357000	00:00:10.961000	00:00:00.604000		TOUCH OTHER	GRAB	0		AMB TOUCH	AMB TOUCH	1
6_29_18_(1)_N_BLANK.eaf	00:00:19.112000	00:00:19.353000	00:00:00.241000		JUMP	JUMP	1		JUMP	JUMP	1
6_29_18_(1)_N_BLANK.eaf	00:00:19.353000	00:00:20.440000	00:00:01.087000		TOUCH OTHER	SLAP OTHER	0		AMB TOUCH	SLAP OTHER	0
6_29_18_(1)_N_BLANK.eaf	00:00:30.957000	00:00:32.595000	00:00:01.638000		TOUCH OTHER	GRAB	0		AMB TOUCH	AMB TOUCH	1
6_29_18_(1)_N_BLANK.eaf	00:03:52.601000	00:03:53.687000	00:00:01.086000		UNSURE/UNKNOWN	TOUCH OTHER	0		UNSURE/UNKNOWN	AMB TOUCH	0
6_29_18_(31)_N_BLANK.eaf	00:00:31.999000	00:00:34	00:00:02.001000		TOUCH OTHER	PUSH	0		AMB TOUCH	PUSH	0
6_29_18_(31)_N_BLANK.eaf	00:00:46.333000	00:00:48.666000	00:00:02.333000		HAND ON	PUSH	0		AMB TOUCH	PUSH	0
6_29_18_(31)_N_BLANK.eaf	00:00:49.444000	00:00:51.777000	00:00:02.333000		HAND ON	PUSH	0		AMB TOUCH	PUSH	0
6_29_18_(31)_N_BLANK.eaf	00:03:03.565000	00:03:06.080000	00:00:02.515000		HAND ON	PUSH	0		AMB TOUCH	PUSH	0
6_29_18_(31)_N_BLANK.eaf	00:03:19.064000	00:03:22.264000	00:00:03.200000		HAND ON	PUSH	0		AMB TOUCH	PUSH	0
6_29_18_(31)_N_BLANK.eaf	00:03:36.660000	00:03:38.900000	00:00:02.240000		HAND ON	EMBRACE	0		AMB TOUCH	EMBRACE	0
6_29_18_(31)_N_BLANK.eaf	00:03:38.940000	00:03:40.420000	00:00:01.480000		BITE	BITE	1		BITE	BITE	1
6_29_18_(31)_N_BLANK.eaf	00:05:17.760000	00:05:19.720000	00:00:01.960000		EMBRACE	HAND ON	0		EMBRACE	AMB TOUCH	0
6_29_18_(31)_N_BLANK.eaf	00:05:48.520000	00:05:50.040000	00:00:01.520000		TOUCH OTHER	GRAB	0		AMB TOUCH	AMB TOUCH	1
6_29_18_(31)_N_BLANK.eaf	00:05:50.080000	00:05:52.280000	00:00:02.200000		HAND ON	TANDEM WALK	0		AMB TOUCH	TANDEM WALK	0
6_29_18_(31)_N_BLANK.eaf	00:07:22.585000	00:07:25.905000	00:00:03.320000		ARM SWING	EMBRACE	0		SWING/ROCK	EMBRACE	0
6_29_18_(31)_N_BLANK.eaf	00:07:25.905000	00:07:27.225000	00:00:01.320000		BITE	BITE	1		BITE	BITE	1
6_29_18_(31)_N_BLANK.eaf	00:07:27.225000	00:07:30.625000	00:00:03.400000		HAND ON	TANDEM WALK	0		AMB TOUCH	TANDEM WALK	0
6_29_18_(31)_N_BLANK.eaf	00:10:20.745000	00:10:24.665000	00:00:03.920000		TOUCH OTHER	PUSH	0		AMB TOUCH	PUSH	0
6_29_18_(31)_N_BLANK.eaf	00:10:28.385000	00:10:32.505000	00:00:04.120000		GRAB PULL	GRAB PULL	1		AMB TOUCH	AMB TOUCH	1
6_29_18_(31)_N_BLANK.eaf	00:14:01.534000	00:14:02.774000	00:00:01.240000		TOUCH OTHER	TOUCH OTHER	1		AMB TOUCH	AMB TOUCH	1
6_29_18_(31)_N_BLANK.eaf	00:14:02.854000	00:14:05.654000	00:00:02.800000		HAND ON	TOUCH OTHER	0		AMB TOUCH	AMB TOUCH	1
6_29_18_(31)_N_BLANK.eaf	00:15:18.618000	00:15:20.378000	00:00:01.760000		TOUCH OTHER	HAND ON	0		AMB TOUCH	AMB TOUCH	1
6_29_18_(31)_N_BLANK.eaf	00:20:46.357000	00:20:47.157000	00:00:00.800000		ARM RAISE	TOUCH OTHER	0		ARM RAISE	AMB TOUCH	0
6_29_18_(31)_N_BLANK.eaf	00:20:47.237000	00:20:48.117000	00:00:00.880000		ARM WAVE	ARM SWING	0		ARM WAVE	SWING/ROCK	0
6_29_18_(31)_N_BLANK.eaf	00:21:02.972000	00:21:04.932000	00:00:01.960000		JUMP	CLAP	0		JUMP	CLAP	0
6_29_18_(31)_N_BLANK.eaf	00:21:29.660000	00:21:29.860000	00:00:00.200000		EMBRACE	EMBRACE	1		EMBRACE	EMBRACE	1
6_29_18_(31)_N_BLANK.eaf	00:21:29.860000	00:21:32.980000	00:00:03.120000		EMBRACE	EMBRACE	1		EMBRACE	EMBRACE	1
6_29_18_(31)_N_BLANK.eaf	00:21:57.720000	00:21:58.480000	00:00:00.760000		REACH	REACH	1		REACH	REACH	1
6_29_18_(31)_N_BLANK.eaf	00:21:58.480000	00:22:01.040000	00:00:02.560000		REACH	REACH	1		REACH	REACH	1
6_29_18_(31)_N_BLANK.eaf	00:22:03.652000	00:22:05.165000	00:00:01.513000		TOUCH OTHER	HAND ON	0		AMB TOUCH	AMB TOUCH	1
6_29_18_(31)_N_BLANK.eaf	00:26:13.299000	00:26:14.208000	00:00:00.909000		SLAP OBJECT	CLAP	0		TAP/SLAP/KNOCK OBJECT	CLAP	0
6_29_18_(31)_N_BLANK.eaf	00:26:17.027000	00:26:17.905000	00:00:00.878000		TOUCH OTHER	HAND ON	0		AMB TOUCH	AMB TOUCH	1
6_29_18_(31)_N_BLANK.eaf	00:26:17.905000	00:26:21.057000	00:00:03.152000		BITE	BITE	1		BITE	BITE	1
6_29_18_(31)_N_BLANK.eaf	00:26:40.835000	00:26:42.622000	00:00:01.787000		HEAD BUTT	GRAB	0		HEAD BUTT	AMB TOUCH	0
6_29_18_(31)_N_BLANK.eaf	00:27:02.333000	00:27:03.757000	00:00:01.424000		THROW OBJECT	THROW OBJECT	1		THROW OBJECT	THROW OBJECT	1
6_29_18_(31)_N_BLANK.eaf	00:27:33.933000	00:27:34.933000	00:00:01		TOUCH OTHER	TOUCH OTHER	1		AMB TOUCH	AMB TOUCH	1
6_29_18_(31)_N_BLANK.eaf	00:27:34.933000	00:27:35.191000	00:00:00.258000		PRESENT BODY PART	PRESENT BODY PART	1		PRESENT BODY PART	PRESENT BODY PART	1
6_29_18_(31)_N_BLANK.eaf	00:27:35.191000	00:27:37.585000	00:00:02.394000		BITE	BITE	1		BITE	BITE	1
6_29_18_(31)_N_BLANK.eaf	00:27:56.104000	00:27:57.289000	00:00:01.185000		SLAP OBJECT	SLAP OBJECT	1		TAP/SLAP/KNOCK OBJECT	TAP/SLAP/KNOCK OBJECT	1
6_29_18_(31)_N_BLANK.eaf	00:27:58.271000	00:28:00.178000	00:00:01.907000		TOUCH OTHER	TOUCH OTHER	1		AMB TOUCH	AMB TOUCH	1
6_29_18_(31)_N_BLANK.eaf	00:28:09.158000	00:28:10.584000	00:00:01.426000		TOUCH OTHER	PUSH	0		AMB TOUCH	PUSH	0
6_29_18_(31)_N_BLANK.eaf	00:28:10.936000	00:28:12.232000	00:00:01.296000		ROCKING	ARM WAVE	0		SWING/ROCK	ARM WAVE	0
6_29_18_(31)_N_BLANK.eaf	00:28:24.607000	00:28:26.320000	00:00:01.713000		PRESENT SEXUAL	PRESENT BODY PART	0		PRESENT SEXUAL	PRESENT BODY PART	0
6_29_18_(31)_N_BLANK.eaf	00:28:26.320000	00:28:27.283000	00:00:00.963000		REACH	HAND FLING	0		REACH	HAND FLING	0
6_29_18_(31)_N_BLANK.eaf	00:28:28.848000	00:28:31.348000	00:00:02.500000		HAND ON	TANDEM WALK	0		AMB TOUCH	TANDEM WALK	0
6_29_18_(31)_N_BLANK.eaf	00:28:52	00:28:52.940000	00:00:00.940000		SLAP OTHER	SLAP OTHER	1		SLAP OTHER	SLAP OTHER	1
6_29_18_(31)_N_BLANK.eaf	00:29:09.029000	00:29:12.070000	00:00:03.041000		HAND ON	EMBRACE	0		AMB TOUCH	EMBRACE	0
6_29_18_(31)_N_BLANK.eaf	00:29:55.196000	00:29:55.951000	00:00:00.755000		SLAP OTHER	SLAP OTHER	1		SLAP OTHER	SLAP OTHER	1
6_29_18_(31)_N_BLANK.eaf	00:30:06.083000	00:30:11.961000	00:00:05.878000		SLAP OBJECT	SLAP OBJECT	1		TAP/SLAP/KNOCK OBJECT	TAP/SLAP/KNOCK OBJECT	1
6_29_18_(31)_N_BLANK.eaf	00:30:28.573000	00:30:37.533000	00:00:08.960000		ARM SWING	ROCKING	0		SWING/ROCK	SWING/ROCK	1
6_29_18_(31)_N_BLANK.eaf	00:30:37.553000	00:30:39.043000	00:00:01.490000		JUMP	JUMP	1		JUMP	JUMP	1
6_29_18_(31)_N_BLANK.eaf	00:31:00.136000	00:31:03.687000	00:00:03.551000		ROCKING	ROCKING	1		SWING/ROCK	SWING/ROCK	1
6_29_18_(31)_N_BLANK.eaf	00:31:06.912000	00:31:07.871000	00:00:00.959000		SLAP OTHER	SLAP OBJECT	0		SLAP OTHER	TAP/SLAP/KNOCK OBJECT	0
6_29_18_(31)_N_BLANK.eaf	00:33:48.522000	00:33:54.665000	00:00:06.143000		HAND ON	GRAB PULL	0		AMB TOUCH	AMB TOUCH	1
6_29_18_(31)_N_BLANK.eaf	00:33:54.665000	00:33:57.642000	00:00:02.977000		TAP OTHER	TOUCH OTHER	0		AMB TOUCH	AMB TOUCH	1
6_29_18_(31)_N_BLANK.eaf	00:33:57.642000	00:33:59.927000	00:00:02.285000		TOUCH OTHER	HAND ON	0		AMB TOUCH	AMB TOUCH	1
6_29_18_(31)_N_BLANK.eaf	00:34:08.808000	00:34:10.142000	00:00:01.334000		TOUCH OTHER	TOUCH OTHER	1		AMB TOUCH	AMB TOUCH	1
6_29_18_(31)_N_BLANK.eaf	00:34:43.596000	00:34:47.549000	00:00:03.953000		HAND ON	EMBRACE	0		AMB TOUCH	EMBRACE	0
6_29_18_(31)_N_BLANK.eaf	00:34:50.047000	00:34:51.856000	00:00:01.809000		JUMP	HAND FLING	0		JUMP	HAND FLING	0
6_29_18_(31)_N_BLANK.eaf	00:34:56.380000	00:35:10.095000	00:00:13.715000		ARM SWING	ROCKING	0		SWING/ROCK	SWING/ROCK	1
6_29_18_(31)_N_BLANK.eaf	00:35:10.095000	00:35:18.285000	00:00:08.190000		ARM SWING	ROCKING	0		SWING/ROCK	SWING/ROCK	1
6_29_18_(31)_N_BLANK.eaf	00:37:23.871000	00:37:24.395000	00:00:00.524000		EMBRACE	EMBRACE	1		EMBRACE	EMBRACE	1
6_29_18_(31)_N_BLANK.eaf	00:37:24.395000	00:37:27.728000	00:00:03.333000		EMBRACE	EMBRACE	1		EMBRACE	EMBRACE	1
6_29_18_(31)_N_BLANK.eaf	00:37:30.300000	00:37:33.490000	00:00:03.190000		EMBRACE	EMBRACE	1		EMBRACE	EMBRACE	1
6_29_18_(31)_N_BLANK.eaf	00:37:34.062000	00:37:38.300000	00:00:04.238000		PRESENT SEXUAL	PRESENT SEXUAL	1		PRESENT SEXUAL	PRESENT SEXUAL	1
6_29_18_(31)_N_BLANK.eaf	00:37:39.728000	00:37:56.662000	00:00:16.934000		PRESENT SEXUAL	PRESENT SEXUAL	1		PRESENT SEXUAL	PRESENT SEXUAL	1
6_29_18_(31)_N_BLANK.eaf	00:39:55.875000	00:39:57.453000	00:00:01.578000		PRESENT BODY PART	REACH	0		PRESENT BODY PART	REACH	0
6_29_18_(31)_N_BLANK.eaf	00:39:57.453000	00:39:58.591000	00:00:01.138000		HAND ON	HAND ON	1		AMB TOUCH	AMB TOUCH	1
6_29_18_(31)_N_BLANK.eaf	00:40:35.415000	00:40:39.656000	00:00:04.241000		LOOK	LOOK	1		LOOK	LOOK	1
6_29_18_(31)_N_BLANK.eaf	00:41:45.785000	00:41:48.319000	00:00:02.534000		ARM SWING	ROCKING	0		SWING/ROCK	SWING/ROCK	1
6_29_18_(31)_N_BLANK.eaf	00:41:48.336000	00:41:49.285000	00:00:00.949000		TOUCH OTHER	HAND ON	0		AMB TOUCH	AMB TOUCH	1
6_29_18_(31)_N_BLANK.eaf	00:44:13.833000	00:44:19.057000	00:00:05.224000		LOOK	LOOK	1		LOOK	LOOK	1
6_29_18_(31)_N_BLANK.eaf	00:45:27.600000	00:45:38.400000	00:00:10.800000		SLAP OTHER	SLAP OTHER	1		SLAP OTHER	SLAP OTHER	1
6_29_18_(31)_N_BLANK.eaf	00:45:44.500000	00:45:47.460000	00:00:02.960000		SLAP OTHER	SLAP OTHER	1		SLAP OTHER	SLAP OTHER	1
6_29_18_(31)_N_BLANK.eaf	00:46:01.569000	00:46:05.409000	00:00:03.840000		BITE	BITE	1		BITE	BITE	1
6_29_18_(31)_N_BLANK.eaf	00:46:05.409000	00:46:14.049000	00:00:08.640000		SLAP OTHER	SLAP OTHER	1		SLAP OTHER	SLAP OTHER	1
6_29_18_(31)_N_BLANK.eaf	00:46:17.669000	00:46:19.209000	00:00:01.540000		TOUCH OTHER	HAND ON	0		AMB TOUCH	AMB TOUCH	1
6_29_18_(31)_N_BLANK.eaf	00:46:19.209000	00:46:21.189000	00:00:01.980000		BITE	BITE	1		BITE	BITE	1
6_29_18_(31)_N_BLANK.eaf	00:46:21.229000	00:46:24.869000	00:00:03.640000		EMBRACE	EMBRACE	1		EMBRACE	EMBRACE	1
6_29_18_(5)_N_BLANK.eaf	00:00:34.512000	00:00:42.609000	00:00:08.097000		HIT WITH OBJECT	SLAP OTHER WITH OBJECT	0		HIT WITH OBJECT	SLAP OTHER WITH OBJECT	0
6_29_18_(5)_N_BLANK.eaf	00:00:45.023000	00:00:46.950000	00:00:01.927000		UNSURE/UNKNOWN	OBJECT MOVE	0		UNSURE/UNKNOWN	OBJECT MOVE	0
6_29_18_(5)_N_BLANK.eaf	00:00:50.999000	00:00:52.438000	00:00:01.439000		CLAP	CLAP	1		CLAP	CLAP	1
6_29_18_(5)_N_BLANK.eaf	00:00:52.438000	00:00:53.097000	00:00:00.659000		THROW OBJECT	THROW OBJECT	1		THROW OBJECT	THROW OBJECT	1
6_29_18_(5)_N_BLANK.eaf	00:00:56.609000	00:00:58.658000	00:00:02.049000		THROW OBJECT	THROW OBJECT	1		THROW OBJECT	THROW OBJECT	1
6_29_18_(5)_N_BLANK.eaf	00:01:22.072000	00:01:28.268000	00:00:06.196000		HAND ON	PUSH	0		AMB TOUCH	PUSH	0
7_11_18_(14)_N_BLANK.eaf	00:00:05.878000	00:00:06.926000	00:00:01.048000		SLAP OTHER	HAND FLING	0		SLAP OTHER	HAND FLING	0
7_11_18_(14)_N_BLANK.eaf	00:02:05.951000	00:02:11.536000	00:00:05.585000		HEAD NOD	ROCKING	0		HEAD NOD	SWING/ROCK	0
7_11_18_(15)_N_BLANK.eaf	00:00:03.048000	00:00:05.756000	00:00:02.708000		OBJECT IN MOUTH APPROACH	OBJECT MOVE	0		OBJECT IN MOUTH APPROACH	OBJECT MOVE	0
7_11_18_(15)_N_BLANK.eaf	00:00:05.756000	00:00:11.658000	00:00:05.902000		ARM SWING	ROCKING	0		SWING/ROCK	SWING/ROCK	1
7_11_18_(15)_N_BLANK.eaf	00:01:19.316000	00:01:28.974000	00:00:09.658000		ARM SWING	ROCKING	0		SWING/ROCK	SWING/ROCK	1
7_11_18_(16)_N_BLANK.eaf	00:00:41.414000	00:00:42.731000	00:00:01.317000		STOMP	KNOCK OBJECT	0		STOMP	TAP/SLAP/KNOCK OBJECT	0
7_12_18_(17)_BLANK.eaf	00:00:03.294000	00:00:04.176000	00:00:00.882000		HAND FLING	HAND FLING	1		HAND FLING	HAND FLING	1
7_12_18_(17)_BLANK.eaf	00:00:05.294000	00:00:05.489000	00:00:00.195000		HAND FLING	HAND FLING	1		HAND FLING	HAND FLING	1
7_12_18_(17)_BLANK.eaf	00:00:05.489000	00:00:06.693000	00:00:01.204000		TAP OTHER	TOUCH OTHER	0		AMB TOUCH	AMB TOUCH	1
7_12_18_(17)_BLANK.eaf	00:00:06.959000	00:00:08.161000	00:00:01.202000		ROLL OVER	ROLL OVER	1		ROLL OVER	ROLL OVER	1
7_12_18_(17)_BLANK.eaf	00:00:08.161000	00:00:09.066000	00:00:00.905000		TOUCH OTHER	EMBRACE	0		AMB TOUCH	EMBRACE	0
7_12_18_(17)_BLANK.eaf	00:00:09.066000	00:00:12.526000	00:00:03.460000		EMBRACE	ROCKING	0		EMBRACE	SWING/ROCK	0
7_12_18_(17)_BLANK.eaf	00:00:12.526000	00:00:16.122000	00:00:03.596000		ROLL OVER	ROLL OVER	1		ROLL OVER	ROLL OVER	1
7_12_18_(17)_BLANK.eaf	00:00:23.857000	00:00:27.653000	00:00:03.796000		ROLL OVER	ROLL OVER	1		ROLL OVER	ROLL OVER	1
7_12_18_(17)_BLANK.eaf	00:00:27.653000	00:00:29.673000	00:00:02.020000		ARM WAVE	SLAP OTHER	0		ARM WAVE	SLAP OTHER	0
7_12_18_(17)_BLANK.eaf	00:00:35.306000	00:00:54.845000	00:00:19.539000		REACH	REACH	1		REACH	REACH	1
7_12_18_(17)_BLANK.eaf	00:00:55.815000	00:00:56.836000	00:00:01.021000		ROCKING	JUMP	0		SWING/ROCK	JUMP	0
7_12_18_(17)_BLANK.eaf	00:00:56.836000	00:00:58.427000	00:00:01.591000		JUMP	SLAP OTHER	0		JUMP	SLAP OTHER	0
7_12_18_(17)_BLANK.eaf	00:00:58.427000	00:00:59.529000	00:00:01.102000		TAP OTHER	PUSH	0		AMB TOUCH	PUSH	0
7_12_18_(17)_BLANK.eaf	00:01:03.754000	00:01:04.162000	00:00:00.408000		REACH	REACH	1		REACH	REACH	1
7_12_18_(17)_BLANK.eaf	00:01:04.162000	00:01:04.733000	00:00:00.571000		HAND FLING	GRAB	0		HAND FLING	AMB TOUCH	0
7_12_18_(17)_BLANK.eaf	00:01:05.183000	00:01:07.612000	00:00:02.429000		ROLL OVER	ROLL OVER	1		ROLL OVER	ROLL OVER	1
7_12_18_(17)_BLANK.eaf	00:01:09.550000	00:01:11.244000	00:00:01.694000		SLAP OBJECT	SLAP OBJECT	1		TAP/SLAP/KNOCK OBJECT	TAP/SLAP/KNOCK OBJECT	1
7_12_18_(17)_BLANK.eaf	00:01:11.285000	00:01:12.122000	00:00:00.837000		CLAP	CLAP	1		CLAP	CLAP	1
7_12_18_(17)_BLANK.eaf	00:01:13.265000	00:01:13.571000	00:00:00.306000		REACH	PRESENT BODY PART	0		REACH	PRESENT BODY PART	0
7_12_18_(17)_BLANK.eaf	00:01:13.571000	00:01:14.020000	00:00:00.449000		SLAP OTHER	SLAP OTHER	1		SLAP OTHER	SLAP OTHER	1
7_12_18_(17)_BLANK.eaf	00:01:24.509000	00:01:30.039000	00:00:05.530000		DRUM OTHER	DRUM OTHER	1		DRUM OTHER	DRUM OTHER	1
7_12_18_(17)_BLANK.eaf	00:01:58.510000	00:02:02.232000	00:00:03.722000		DRUM OTHER	DRUM OTHER	1		DRUM OTHER	DRUM OTHER	1
7_2_18_(11)_N_BLANK.eaf	00:00:00.219000	00:00:03.829000	00:00:03.610000		GRAB	GRAB PULL	0		AMB TOUCH	AMB TOUCH	1
7_2_18_(11)_N_BLANK.eaf	00:03:03.609000	00:03:07.536000	00:00:03.927000		HAND ON	GRAB	0		AMB TOUCH	AMB TOUCH	1
7_2_18_(11)_N_BLANK.eaf	00:05:07.365000	00:05:11.048000	00:00:03.683000		PUSH	PUSH	1		PUSH	PUSH	1
7_2_18_(11)_N_BLANK.eaf	00:05:12.292000	00:05:14.023000	00:00:01.731000		TOUCH OTHER	TOUCH OTHER	1		AMB TOUCH	AMB TOUCH	1
7_2_18_(13)_N_BLANK.eaf	00:01:56.072000	00:01:57.365000	00:00:01.293000		UNSURE/UNKNOWN	HAND FLING	0		UNSURE/UNKNOWN	HAND FLING	0
7_2_18_(13)_N_BLANK.eaf	00:02:11.438000	00:02:20.974000	00:00:09.536000		SLAP OBJECT	SLAP OBJECT	1		TAP/SLAP/KNOCK OBJECT	TAP/SLAP/KNOCK OBJECT	1
7_2_18_(13)_N_BLANK.eaf	00:02:25.316000	00:02:29.804000	00:00:04.488000		DANGLE	DANGLE	1		DANGLE	DANGLE	1
7_2_18_(13)_N_BLANK.eaf	00:02:29.804000	00:02:30.658000	00:00:00.854000		SLAP OBJECT	SLAP OBJECT	1		TAP/SLAP/KNOCK OBJECT	TAP/SLAP/KNOCK OBJECT	1
7_2_18_(13)_N_BLANK.eaf	00:02:41.365000	00:02:44.755000	00:00:03.390000		SLAP OBJECT	SLAP OBJECT	1		TAP/SLAP/KNOCK OBJECT	TAP/SLAP/KNOCK OBJECT	1
7_2_18_(13)_N_BLANK.eaf	00:04:38.853000	00:04:40.585000	00:00:01.732000		GRAB	GRAB	1		AMB TOUCH	AMB TOUCH	1
7_2_18_(13)_N_BLANK.eaf	00:04:41.047000	00:04:42.511000	00:00:01.464000		BITE	BITE	1		BITE	BITE	1
7_2_18_(13)_N_BLANK.eaf	00:04:43.390000	00:04:44.609000	00:00:01.219000		TOUCH OTHER	GRAB	0		AMB TOUCH	AMB TOUCH	1
7_2_18_(13)_N_BLANK.eaf	00:07:48.585000	00:07:49.780000	00:00:01.195000		SLAP OTHER	SLAP OBJECT	0		SLAP OTHER	TAP/SLAP/KNOCK OBJECT	0
7_2_18_(13)_N_BLANK.eaf	00:08:11.633000	00:08:16.194000	00:00:04.561000		ROLL OVER	ROLL OVER	1		ROLL OVER	ROLL OVER	1
7_2_18_(13)_N_BLANK.eaf	00:09:02.230000	00:09:10.230000	00:00:08		DANGLE	DANGLE	1		DANGLE	DANGLE	1
7_23_18_(19)_BLANK.eaf	00:00:07.593000	00:00:08.674000	00:00:01.081000		SLAP OTHER	SLAP OTHER	1		SLAP OTHER	SLAP OTHER	1
7_23_18_(19)_BLANK.eaf	00:01:16.293000	00:01:19.277000	00:00:02.984000		EMBRACE	EMBRACE	1		EMBRACE	EMBRACE	1
7_23_18_(19)_BLANK.eaf	00:03:10.600000	00:03:16.487000	00:00:05.887000		LOOK	LOOK	1		LOOK	LOOK	1
7_23_18_(19)_BLANK.eaf	00:05:38.350000	00:06:27.649000	00:00:49.299000		LOOK	LOOK	1		LOOK	LOOK	1
7_23_18_(19)_BLANK.eaf	00:09:03.886000	00:09:07.305000	00:00:03.419000		LOOK	LOOK	1		LOOK	LOOK	1
7_26_18_(13)_BLANK.eaf	00:01:34.083000	00:01:34.191000	00:00:00.108000		LOOK	LOOK	1		LOOK	LOOK	1
7_26_18_(13)_BLANK.eaf	00:01:34.191000	00:01:47.704000	00:00:13.513000		LOOK	LOOK	1		LOOK	LOOK	1
7_26_18_(13)_BLANK.eaf	00:02:05.120000	00:02:13.765000	00:00:08.645000		LOOK	LOOK	1		LOOK	LOOK	1
7_26_18_(13)_BLANK.eaf	00:03:12.893000	00:03:14.812000	00:00:01.919000		ARM WAVE	ARM RAISE	0		ARM WAVE	ARM RAISE	0
7_26_18_(13)_BLANK.eaf	00:03:59.548000	00:04:00.953000	00:00:01.405000		BITE	BITE	1		BITE	BITE	1
7_26_18_(13)_BLANK.eaf	00:04:02.034000	00:04:02.548000	00:00:00.514000		HAND FLING	GRAB	0		HAND FLING	AMB TOUCH	0
7_26_18_(13)_BLANK.eaf	00:04:02.575000	00:04:03.332000	00:00:00.757000		FOOT PRESENT	KICK	0		FOOT PRESENT	KICK	0
7_26_18_(13)_BLANK.eaf	00:04:29.957000	00:04:32.038000	00:00:02.081000		BECKON	TOUCH OTHER	0		BECKON	AMB TOUCH	0
7_26_18_(13)_BLANK.eaf	00:05:19.899000	00:05:29.026000	00:00:09.127000		LOOK	LOOK	1		LOOK	LOOK	1
7_26_18_(13)_BLANK.eaf	00:07:46.797000	00:08:31.883000	00:00:45.086000		DANGLE	DANGLE	1		DANGLE	DANGLE	1
7_26_18_(13)_BLANK.eaf	00:09:50.480000	00:09:51.939000	00:00:01.459000		THROW OBJECT	THROW OBJECT	1		THROW OBJECT	THROW OBJECT	1
7_26_18_(13)_BLANK.eaf	00:09:57.993000	00:10:05.047000	00:00:07.054000		THROW OBJECT	THROW OBJECT	1		THROW OBJECT	THROW OBJECT	1
7_26_18_(13)_BLANK.eaf	00:10:39.134000	00:10:42.728000	00:00:03.594000		SLAP OBJECT	SLAP OBJECT	1		TAP/SLAP/KNOCK OBJECT	TAP/SLAP/KNOCK OBJECT	1
7_26_18_(13)_BLANK.eaf	00:11:05.829000	00:11:08.235000	00:00:02.406000		SLAP OBJECT	SLAP OBJECT	1		TAP/SLAP/KNOCK OBJECT	TAP/SLAP/KNOCK OBJECT	1
7_26_18_(13)_BLANK.eaf	00:11:41.740000	00:11:45.145000	00:00:03.405000		PRESENT SEXUAL	PRESENT CLIMB ON ME	0		PRESENT SEXUAL	PRESENT CLIMB ON ME	0
7_26_18_(13)_BLANK.eaf	00:11:45.470000	00:11:48.389000	00:00:02.919000		TOUCH OTHER	GRAB	0		AMB TOUCH	AMB TOUCH	1
7_26_18_(13)_BLANK.eaf	00:12:31.866000	00:12:37.245000	00:00:05.379000		LOOK	LOOK	1		LOOK	LOOK	1
7_26_18_(13)_BLANK.eaf	00:12:37.245000	00:12:40.893000	00:00:03.648000		HAND ON	GRAB	0		AMB TOUCH	AMB TOUCH	1
7_26_18_(13)_BLANK.eaf	00:14:05.994000	00:14:08.467000	00:00:02.473000		PRESENT SEXUAL	PRESENT SEXUAL	1		PRESENT SEXUAL	PRESENT SEXUAL	1
7_26_18_(13)_BLANK.eaf	00:14:08.467000	00:14:11.764000	00:00:03.297000		GRAB PULL	GRAB PULL	1		AMB TOUCH	AMB TOUCH	1
7_26_18_(13)_BLANK.eaf	00:14:59.060000	00:15:04.736000	00:00:05.676000		GRAB PULL	GRAB PULL	1		AMB TOUCH	AMB TOUCH	1
7_26_18_(13)_BLANK.eaf	00:15:04.776000	00:15:07.452000	00:00:02.676000		ROCKING	ROCKING	1		SWING/ROCK	SWING/ROCK	1
7_26_18_(13)_BLANK.eaf	00:15:43.893000	00:15:45.569000	00:00:01.676000		THROW OBJECT	THROW OBJECT	1		THROW OBJECT	THROW OBJECT	1
7_26_18_(13)_BLANK.eaf	00:15:45.569000	00:15:46.596000	00:00:01.027000		GRAB PULL	GRAB PULL	1		AMB TOUCH	AMB TOUCH	1
7_26_18_(13)_BLANK.eaf	00:18:21.832000	00:18:24.210000	00:00:02.378000		POKE	TOUCH OTHER	0		POKE	AMB TOUCH	0
7_26_18_(13)_BLANK.eaf	00:18:24.291000	00:18:30.129000	00:00:05.838000		REACH	REACH	1		REACH	REACH	1
7_26_18_(13)_BLANK.eaf	00:19:03.189000	00:19:07.729000	00:00:04.540000		SLAP OTHER	SLAP OTHER WITH OBJECT	0		SLAP OTHER	SLAP OTHER WITH OBJECT	0
7_26_18_(13)_BLANK.eaf	00:19:09.702000	00:19:14.432000	00:00:04.730000		HAND ON	GRAB PULL	0		AMB TOUCH	AMB TOUCH	1
7_26_18_(13)_BLANK.eaf	00:20:27.723000	00:20:36.399000	00:00:08.676000		SOMERSAULT	ROLL OVER	0		SOMERSAULT	ROLL OVER	0
7_26_18_(3)_BLANK.eaf	00:03:00.513000	00:03:01.012000	00:00:00.499000		PRESENT BODY PART	PRESENT BODY PART	1		PRESENT BODY PART	PRESENT BODY PART	1
7_26_18_(3)_BLANK.eaf	00:03:01.012000	00:03:01.458000	00:00:00.446000		TAP OTHER	SLAP OTHER	0		AMB TOUCH	SLAP OTHER	0
7_26_18_(3)_BLANK.eaf	00:03:01.458000	00:03:04.153000	00:00:02.695000		JUMP	JUMP	1		JUMP	JUMP	1
7_26_18_(3)_BLANK.eaf	00:03:04.153000	00:03:04.878000	00:00:00.725000		HAND FLING	HAND FLING	1		HAND FLING	HAND FLING	1
7_9_18_(16)_N_BLANK.eaf	00:01:03.658000	00:01:07.317000	00:00:03.659000		HAND ON	GRAB	0		AMB TOUCH	AMB TOUCH	1
7_9_18_(16)_N_BLANK.eaf	00:01:07.317000	00:01:09.951000	00:00:02.634000		TOUCH OTHER	GRAB PULL	0		AMB TOUCH	AMB TOUCH	1
7_9_18_(16)_N_BLANK.eaf	00:01:15.439000	00:01:19.560000	00:00:04.121000		HAND ON	GRAB	0		AMB TOUCH	AMB TOUCH	1
7_9_18_(16)_N_BLANK.eaf	00:01:19.560000	00:01:21.316000	00:00:01.756000		TOUCH OTHER	GRAB	0		AMB TOUCH	AMB TOUCH	1
7_9_18_(16)_N_BLANK.eaf	00:01:26.511000	00:01:29.511000	00:00:03		HAND ON	HAND ON	1		AMB TOUCH	AMB TOUCH	1
7_9_18_(16)_N_BLANK.eaf	00:01:37.511000	00:01:39.316000	00:00:01.805000		UNSURE/UNKNOWN	GRAB	0		UNSURE/UNKNOWN	AMB TOUCH	0
7_9_18_(16)_N_BLANK.eaf	00:01:39.316000	00:01:44.292000	00:00:04.976000		TOUCH OTHER	BITE	0		AMB TOUCH	BITE	0
7_9_18_(16)_N_BLANK.eaf	00:02:16.901000	00:02:21.218000	00:00:04.317000		STOMP	STOMP	1		STOMP	STOMP	1
8_10_18_(13)_BLANK.eaf	00:03:00.497000	00:03:01.024000	00:00:00.527000		PRESENT BODY PART	PRESENT BODY PART	1		PRESENT BODY PART	PRESENT BODY PART	1
8_10_18_(13)_BLANK.eaf	00:03:01.024000	00:03:02.713000	00:00:01.689000		UNSURE/UNKNOWN	BITE	0		UNSURE/UNKNOWN	BITE	0
8_10_18_(13)_BLANK.eaf	00:03:45.604000	00:03:55.766000	00:00:10.162000		LOOK	LOOK	1		LOOK	LOOK	1
8_2_18_(13)_BLANK.eaf	00:00:25.357000	00:00:29.006000	00:00:03.649000		ARM WAVE	ROCKING	0		ARM WAVE	SWING/ROCK	0
8_2_18_(13)_BLANK.eaf	00:00:29.006000	00:00:29.186000	00:00:00.180000		TOUCH OTHER	HAND ON	0		AMB TOUCH	AMB TOUCH	1
8_2_18_(13)_BLANK.eaf	00:00:29.186000	00:00:30.321000	00:00:01.135000		TOUCH OTHER	HAND ON	0		AMB TOUCH	AMB TOUCH	1
8_2_18_(14)_BLANK.eaf	00:00:42.510000	00:01:17.525000	00:00:35.015000		TAP OBJECT	KNOCK OBJECT	0		TAP/SLAP/KNOCK OBJECT	TAP/SLAP/KNOCK OBJECT	1
8_2_18_(14)_BLANK.eaf	00:05:20.134000	00:05:27.972000	00:00:07.838000		ROCKING	ROCKING	1		SWING/ROCK	SWING/ROCK	1
8_2_18_(14)_BLANK.eaf	00:05:29.729000	00:05:31.026000	00:00:01.297000		SLAP OBJECT	KNOCK OBJECT	0		TAP/SLAP/KNOCK OBJECT	TAP/SLAP/KNOCK OBJECT	1
8_2_18_(14)_BLANK.eaf	00:07:01.256000	00:07:03.500000	00:00:02.244000		TAP OTHER	PUNCH OTHER	0		AMB TOUCH	PUNCH OTHER	0
8_2_18_(14)_BLANK.eaf	00:07:03.500000	00:07:06.986000	00:00:03.486000		GRAB	GRAB PULL	0		AMB TOUCH	AMB TOUCH	1
8_2_18_(14)_BLANK.eaf	00:07:06.986000	00:07:09.797000	00:00:02.811000		SLAP OTHER	SLAP OTHER	1		SLAP OTHER	SLAP OTHER	1
8_2_18_(14)_BLANK.eaf	00:11:21.093000	00:11:28.525000	00:00:07.432000		ROCKING	ROCKING	1		SWING/ROCK	SWING/ROCK	1
8_2_18_(14)_BLANK.eaf	00:12:56.618000	00:13:01.503000	00:00:04.885000		TAP OBJECT	KNOCK OBJECT	0		TAP/SLAP/KNOCK OBJECT	TAP/SLAP/KNOCK OBJECT	1
8_2_18_(14)_BLANK.eaf	00:13:01.503000	00:13:03.881000	00:00:02.378000		TOUCH OTHER	GRAB PULL	0		AMB TOUCH	AMB TOUCH	1
8_2_18_(14)_BLANK.eaf	00:15:18.076000	00:15:23.807000	00:00:05.731000		HAND ON	GRAB	0		AMB TOUCH	AMB TOUCH	1
8_2_18_(14)_BLANK.eaf	00:15:23.807000	00:15:25.012000	00:00:01.205000		PUSH	KICK	0		PUSH	KICK	0
8_2_18_(14)_BLANK.eaf	00:15:26.012000	00:15:27.076000	00:00:01.064000		UNSURE/UNKNOWN	KNOCK OBJECT	0		UNSURE/UNKNOWN	TAP/SLAP/KNOCK OBJECT	0
8_2_18_(14)_BLANK.eaf	00:15:28.564000	00:15:28.743000	00:00:00.179000		UNSURE/UNKNOWN	KNOCK OBJECT	0		UNSURE/UNKNOWN	TAP/SLAP/KNOCK OBJECT	0
8_2_18_(14)_BLANK.eaf	00:15:28.743000	00:15:30.128000	00:00:01.385000		TOUCH OTHER	KICK	0		AMB TOUCH	KICK	0
8_2_18_(14)_BLANK.eaf	00:15:30.128000	00:15:31.083000	00:00:00.955000		PUSH	PUNCH OTHER	0		PUSH	PUNCH OTHER	0
8_2_18_(14)_BLANK.eaf	00:15:31.083000	00:15:31.788000	00:00:00.705000		SLAP OTHER	SLAP OTHER	1		SLAP OTHER	SLAP OTHER	1
8_2_18_(14)_BLANK.eaf	00:15:33.166000	00:15:34.076000	00:00:00.910000		HAND FLING	HAND FLING	1		HAND FLING	HAND FLING	1
8_2_18_(14)_BLANK.eaf	00:15:34.076000	00:15:34.999000	00:00:00.923000		ARM RAISE	ARM RAISE	1		ARM RAISE	ARM RAISE	1
8_2_18_(14)_BLANK.eaf	00:15:37.755000	00:15:41.640000	00:00:03.885000		HAND ON	GRAB	0		AMB TOUCH	AMB TOUCH	1
8_2_18_(14)_BLANK.eaf	00:15:54.773000	00:15:56.273000	00:00:01.500000		GRAB	GRAB	1		AMB TOUCH	AMB TOUCH	1
8_2_18_(14)_BLANK.eaf	00:15:56.273000	00:16:07.870000	00:00:11.597000		BITE	BITE	1		BITE	BITE	1
8_6_18_(19)_BLANK.eaf	00:02:31.371000	00:02:36.452000	00:00:05.081000		ROCKING	ROCKING	1		SWING/ROCK	SWING/ROCK	1
8_6_18_(19)_BLANK.eaf	00:02:36.452000	00:02:38.615000	00:00:02.163000		REACH	REACH	1		REACH	REACH	1
8_6_18_(19)_BLANK.eaf	00:02:38.669000	00:02:43.858000	00:00:05.189000		GRAB PULL	GRAB PULL	1		AMB TOUCH	AMB TOUCH	1
8_6_18_(19)_BLANK.eaf	00:02:43.885000	00:02:45.912000	00:00:02.027000		PRESENT SEXUAL	PRESENT SEXUAL	1		PRESENT SEXUAL	PRESENT SEXUAL	1
8_6_18_(19)_BLANK.eaf	00:02:45.912000	00:02:47.074000	00:00:01.162000		TOUCH OTHER	TOUCH OTHER	1		AMB TOUCH	AMB TOUCH	1
8_7_18_(7)_BLANK.eaf	00:00:08.675000	00:00:10.648000	00:00:01.973000		SLAP OBJECT	STOMP	0		TAP/SLAP/KNOCK OBJECT	STOMP	0
8_8_18_(10)_BLANK.eaf	00:00:06.972000	00:00:07.837000	00:00:00.865000		THRUST	GRAB	0		THRUST	AMB TOUCH	0
8_8_18_(10)_BLANK.eaf	00:00:07.837000	00:00:09.297000	00:00:01.460000		TOUCH OTHER	PUSH	0		AMB TOUCH	PUSH	0
					AGREEMENT:		0.485185		AGREEMENT:		0.655556

## Sheet: IRR Info - Consolidation
IRR Information - Manual Gesture Agreement (Before and After Consolidation)
Agreement is based on whether MWC (IRR coder) agreed with the coding of BNF (the primary coder).
Before Consolidation		After Consolidation			Consolidation explanation:
Gesture Types	Agreement %	Gesture Types	Agreement %		We chose to consolidate 11 gesture types into 3 bigger gesture typings for 3 main reasons.
GRAB	0.136364	AMB. TOUCH	0.808824
GRAB PULL	0.4375				First,these gesture types are very morphologically similar to one another.
HAND ON	0.25				Second, these gesture types are frequently observed in the data set (see Raw Data tab).
TOUCH OTHER	0.428571				Third, we found that IRR was generally low due to gesture types that are very similar in morphology.
TAP OTHER	--					For example: in some instances, BNF would code "touch other" whereas MWC would code similar gesture types such as "hand on" and "tap other".
ARM SWING	0	SWING/ROCK	0.631579
ROCKING	0.3125				We chose not to condense other gesture categories for 3 main reasons.
DRUM OBJECT (PALMS)	--	TAP/SLAP/KNOCK OBJECT	0.705882
KNOCK OBJECT	0				First, these geture types are morphologically distinct.
SLAP OBJECT	0.8				Second the total IRR score across the remaining 31 gesture types was relatively higher (59.04%) compared to the total agreement for the 11 gesture types before consolidation (31.73%).
TAP OBJECT	--				Third, some of these gesture types were removed from the study due to low sample sizes.
ARM RAISE	0.333333	ARM RAISE	0.333333
ARM WAVE✝	0.5	ARM WAVE ✝	0.5
BITE	0.789474	BITE	0.789474
CLAP	0.4	CLAP	0.4
DANGLE	1	DANGLE	1
DIRECTED PUSH	0	DIRECTED PUSH	0
DRUM OTHER ✝	1	DRUM OTHER ✝	1
EMBRACE	0.5	EMBRACE	0.5
GALLOP ✝	0	GALLOP ✝	0
HAND FLING	0.5	HAND FLING	0.5
HEAD STAND✝	1	HEAD STAND ✝	1
JUMP	0.75	JUMP	0.75
KICK	0	KICK	0
LEG SWING ✝	0	LEG SWING ✝	0
LOOK	1	LOOK	1
OBJECT MOVE	0	OBJECT MOVE	0
OBJECT SHAKE ✝	1	OBJECT SHAKE ✝	1
PIROUETTE	--	PIROUETTE	--
PRESENT BODY PART	0.5	PRESENT BODY PART	0.5
PRESENT CLIMB ON ME	0	PRESENT CLIMB ON ME	0
PRESENT SEXUAL	1	PRESENT SEXUAL	1
PUNCH OTHER	0	PUNCH OTHER	0
PUSH	0.2	PUSH	0.2
REACH	0.7	REACH	0.7
ROLL OVER	0.833333	ROLL OVER	0.833333
SLAP OTHER	0.666667	SLAP OTHER	0.666667
SLAP OTHER WITH OBJECT	0.2	SLAP OTHER WITH OBJECT	0.2
STOMP	0.5	STOMP	0.5
TANDEM WALK	0	TANDEM WALK	0
THROW OBJECT	1	THROW OBJECT	1
THRUST ✝	1	THRUST ✝	1
✝Gesture type was removed from final data analysis due to low sample size.

## Sheet: FE_V vs FE_NV
Signal Type	With Vocalizaiton? (1=yes, 0=no)	CTI Scores	CGS Scores
Ambiguous Face	0	0.362832	8.74
Bared Teeth Face	0	0.245283	6.57
Lipsmacking Face	1	0.988095	6.08
Lower Lip Relaxer Face	0	0.305085	9.1
Pant Hoot Face	1	0.486755	6.56
Pout Face	0	0.272727	8.73
Raspberry Face	1	0.722222	7.26
Scream Face	1	0.52	8.13
